1 **Title:** Evaluation of nutrient stoichiometric relationships amongst ecosystem compartments of a  
2 subtropical treatment wetland. Fine-scale analysis of wetland nutrient stoichiometry.

3

4 Paul Julian II<sup>1</sup>, Stefan Gerber<sup>2</sup>, Rupesh Bhomia<sup>2</sup>, Jill King<sup>3</sup>, Todd Z. Osborne<sup>4,5</sup>, Alan L. Wright<sup>1</sup>

5 <sup>1</sup> University of Florida, Soil and Water Sciences Department, Ft. Pierce, FL 34945

6 \*Corresponding Author: [pjulian@ufl.edu](mailto:pjulian@ufl.edu); ORCID: 0000-0002-7617-1354

7 <sup>2</sup> University of Florida, Soil and Water Sciences Department, Gainesville, FL, 32611

8 <sup>3</sup> South Florida Water Management District, Water Quality Treatment Technologies, West Palm  
9 Beach, FL, 33406

10 <sup>4</sup>University of Florida, Whitney Laboratory for Marine Bioscience, St Augustine, FL 32080

## 11 **Abstract**

12 **Background:** Evaluation of carbon (C), nitrogen (N) and phosphorus (P) ratios in aquatic and  
13 terrestrial ecosystems can advance our understanding of biological processes, nutrient cycling  
14 and the fate of organic matter (OM). Eutrophication of aquatic ecosystems can upset the  
15 accumulation and decomposition of OM which serves as the base of the aquatic food web. This  
16 study investigated nutrient stoichiometry within and between wetland ecosystem compartments  
17 of two treatment flow-ways (FWs) in the Everglades Stormwater Treatment Areas located in  
18 south Florida (USA). These FWs include an emergent aquatic vegetation FW dominated by  
19 *Typha spp.*(cattail) and a submerged aquatic vegetation FW composed of species such as *Chara*  
20 *spp.* (muskgrass) and *Potamogeton spp.* (pondweed).

21 **Results:** This study demonstrates that C, N, and P stoichiometry can be highly variable within  
22 and between wetland ecosystem compartments influenced largely by biota. Generally, total P  
23 declined along the length of each treatment FW in all ecosystem compartments, whereas trends  
24 in total N and C trends were more variable. These changes in C and nutrient concentrations  
25 results in variable nutrient stoichiometry along treatment FWs signaling potential changes in  
26 nutrient availability and biogeochemical processes.

27 **Conclusions:** Assessment of wetland nutrient stoichiometry between and within ecosystem  
28 compartments suggest decoupling of OM decomposition from nutrient mineralization which may  
29 have considerable influence on nutrient removal rates and contrasting dominate vegetation  
30 communities. Moreover, based on these OM dynamics and nutrient stoichiometric relationships  
31 differences food webs structure and composition could vary between systems resulting in  
32 variable feedback cycles related to nutrient cycling. Therefore, this information could be used to  
33 further understand water treatment performance and adaptively manage these constructed  
34 wetlands.

35 **Keywords:** decomposition, mineralization, Everglades, treatment wetlands

36

## 37 **Introduction**

38 The study of nutrient stoichiometry, pioneered by Redfield (1934, 1958), laid the foundation of two  
39 important biogeochemical principles that later became basic tenets of ecological stoichiometry: (1)  
40 organisms have consistent carbon (C), nitrogen (N) and phosphorus (P) molar ratios and (2) the  
41 abundance of C, N and P in organisms is regulated by interactions between them and their environment.  
42 The basic premise of the Redfield ratio is that C:N:P is well constrained based on the similarity  
43 of measured N and P concentrations in marine plankton relative to the nitrate (NO<sub>3</sub>) to phosphate  
44 (PO<sub>4</sub>) ratio in deep ocean water. The Redfield ratio describes the ratio of NO<sub>3</sub>, PO<sub>4</sub> and non-  
45 calcite inorganic C (i.e. inorganic C, N and P) in deep seawater (Redfield 1934, 1958; Lenton  
46 and Watson 2000; Geider and La Roche 2002). The stoichiometric values of the Redfield ratio  
47 thus describe the average composition of marine OM and the necessary oxygen required to  
48 decompose the organic matter (OM) via respiration. Since its acceptance, the Redfield ratio has  
49 been debated and revisited frequently in light of new analytical methods, more data, and  
50 clarification of the frequent misrepresentations of the notable Redfield ratio (Lenton and Watson  
51 2000; Geider and La Roche 2002). Furthermore the Redfield ratio concept has been extended  
52 beyond marine ecosystems into freshwater and terrestrial systems (Dodds et al. 2002; Dodds  
53 2003; Cleveland and Liptzin 2007; Xu et al. 2013).

54 In general, wetlands are net C sinks that store a large amount of the global C driven by a  
55 disproportionate accumulation of C via plant productivity and export from the decomposition of  
56 organic matter (Billett and Moore 2008; Kayranli et al. 2010). Decomposition of OM involves a  
57 stepwise conversion of complex organic molecules into simple constituents through physical  
58 leaching and fragmentation, extracellular hydrolysis, and catabolic activities by microbes (Reddy  
59 and DeLaune 2008). Anthropogenically mediated nutrient loading to otherwise pristine wetlands

60 has a potential to disrupt the ecological balance and substantially affect nutrient (i.e. N and P)  
61 cycling through the disruption of OM decomposition dynamics and other biogeochemical  
62 processes. Long-term nutrient enrichment in wetlands can affect OM decomposition rates by  
63 increasing microbial productivity leading to accelerated rates of C mineralization and nutrient  
64 cycling (Qualls and Richardson 2000). Therefore, excessive external inputs of nutrients to an  
65 ecosystem can lead to disruption in the stoichiometric balance of ecosystem compartments by  
66 preferential uptake and assimilation resulting in alteration of OM decomposition processes  
67 mediated by microbes (Zhan et al. 2017). Other factors that also influence OM decomposition  
68 associated with excessive loading include changes in water column oxygen regime, oxidation-  
69 reduction conditions and hydrology.

70 In addition to changes to microbial OM decomposition dynamics, enrichment of natural systems  
71 significantly influences OM accumulation via larger ecosystem through shifts in plant and algal  
72 communities (Pan et al. 2000). Eutrophication of aquatic ecosystems allows for nutrient tolerant  
73 species to establish and thrive while reducing the overall coverage of nutrient sensitive species  
74 leading to a cascading effect on the entire ecosystem structure and function. In the Everglades  
75 ecosystem, stormwater run-off has accelerated soil accretion dynamics, and the spread of *Typha*  
76 spp. (cattail) have been well documented (Davis and Ogden 1994; Newman et al. 1998). Because  
77 of nutrient inputs and altered hydrology, Everglades flora and fauna have been significantly  
78 impacted through widescale encroachment of cattails, loss of calcareous periphyton and other  
79 ecological changes within the Everglades marsh (Davis and Ogden 1994). In an effort to restore  
80 the biological integrity of the system, the State of Florida and the US Federal government  
81 initiated restoration and control efforts. One such effort is the construction of treatment wetlands  
82 to improve the quality of agricultural surface runoff water originating in the Everglades

83 Agricultural Area (EAA) prior to entering the downstream Everglades ecosystem (Chen et al.  
84 2015). These treatment wetlands, referred to as the Everglades stormwater treatment areas  
85 (STAs) were constructed with the primary objective of removing P from surface water prior to  
86 discharge to the Everglades Protection Area. The STAs are composed of several treatment cells  
87 which use natural wetland communities to facilitate the removal of P from the water column by  
88 leveraging natural wetland processes including nutrient storage in vegetative tissues and soils  
89 (Kadlec and Wallace 2009). Previous studies have suggested that C:N:P ratios in soil and soil  
90 microbial biomass are tightly constrained providing a Redfield-like stoichiometric ratio across  
91 forested, grassland and natural wetland ecosystems (Cleveland and Liptzin 2007; Xu et al. 2013).  
92 Given the role of OM accumulation and decomposition in wetland ecosystems, nutrient  
93 stoichiometry is important to understand the cycling and controls of nutrient removal. Given the  
94 primary objective of the STAs and the role they play as biogeochemical hotspots (McClain et al.  
95 2003), this study will evaluate stoichiometry relationships within treatment wetlands. The  
96 objectives of this study were to investigate nutrient stoichiometry within a treatment wetland  
97 ecosystem to understand changes in nutrient pools within each ecosystem compartment. The first  
98 objective of this study was to evaluate nutrient relationships (i.e. C x N, C x P and N x P) within  
99 surface water, soil flocculent material (floc), recently accreted soil (RAS) and vegetation live  
100 aboveground biomass (AGB) ecosystem between two cells, one dominated by emergent aquatic  
101 vegetation (EAV) and the other by submerged aquatic vegetation (SAV). The second objective  
102 of this study was to assess changes in nutrient stoichiometry in surface water, floc and RAS  
103 ecosystem compartments along each flow way transect. The first hypothesis is that along a given  
104 treatment cell, nutrient stoichiometry will be tightly constrained across different ecosystem  
105 compartment as suggested by previous studies (Cleveland and Liptzin 2007; Xu et al. 2013). The

106 second hypothesis is that due to external loading, shifts in nutrient stoichiometry is likely to  
107 occur along a given flow path due to biogeochemical processes associated with uptake,  
108 utilization and storage of excess nutrients that supersede the ecosystem demands resulting in  
109 strong nutrient gradients from inflow-to-outflow. The final hypothesis is that due to differences  
110 in vegetation and associated biogeochemical processes nutrient stoichiometry in surface water,  
111 flocculation, RAS and living-AGB will differ between flow paths inhabited by different vegetation types.

112

## 113 **Methods**

### 114 *Study Area*

115 Everglades STAs reduce surface water P loads in an effort to preserve and protect the remaining  
116 Everglades ecosystem (Chimney 2017). A total of six STAs with an approximate area of 18,000  
117 ha are located south of Lake Okeechobee in the southern portion of the EAA (Fig 1). Prior land  
118 uses within the current STA boundaries include natural wetlands and agricultural land use  
119 dominated by sugarcane. The primary source of inflow water to the STAs is agricultural runoff  
120 originating from approximately 284,000 ha of farmland upstream. Everglades STA treatment  
121 cells are comprised of a mixture of EAV and SAV communities in several configurations  
122 including EAV and SAV treatment cells arranged in parallel or in series (Chen et al. 2015).

123 Stormwater Treatment Area-2 has been in operation since June 1999 with an effective treatment  
124 area of approximately 6,270 ha divided into eight treatment cells. This study was conducted in  
125 two cells, cells 1 and 3 which are conventionally called flow-ways (FWs) 1 and 3, respectively.  
126 The vegetative community of FW 1 is comprised predominately of EAV vegetation including  
127 *Typha domingensis* Pers. (cattail) and *Cladium jamaicense* Crantz (sawgrass) while FW 3 is

128 dominantly SAV including *Chara* spp. (muskgrass), *Potamogeton* spp. (pondweed) and *Najas*  
129 *guadalupensis* Spreng (southern naiad) with approximately a third of the FW occupied by EAV  
130 species. Furthermore, prior to STA-2 construction FW 1 was a historic natural wetland while  
131 approximate two-thirds of FW 3 was previously farmed and is now managed as a SAV system  
132 (Juston and DeBusk 2006).

133

#### 134 *Data Source*

135 Water quality monitoring locations were established along two flow paths within STA-2 along a  
136 transect running from inflow to outflow of the FW. Weekly surface water grab samples were  
137 collected at monitoring locations within FW 1 and 3 to characterize changes in nutrient  
138 concentrations and availability during prescribe/semi-managed flow events (Fig 1). When  
139 adequate water was available within the water management systems, prescribed flow events were  
140 scheduled and cycled through various flow/no-flow sequences for FWs 1 and 3. Water column  
141 parameters such as total P (TP), total N (TN), and dissolved organic carbon (DOC) were  
142 analyzed on these water samples. Soil samples were also collected along the flow transects twice  
143 during the dry and wet seasons throughout the course of this study. Soils were sampled using the  
144 push-core method by a 50-cm long polycarbonate coring tube (10-cm internal diameter)  
145 consistent with methods used in prior wetland soil studies (Bruland et al. 2007; Osborne et al.  
146 2011; Newman et al. 2017). Samples were extruded from the soil core tube and partitioned into  
147 floc and RAS. Soil samples were analyzed for loss-on-ignition (LOI), TP, TN, TC and total  
148 calcium (TCa). Living and senescent aboveground biomass (AGB) were sampled from dominant  
149 vegetation in FW 1 while only living aboveground biomass was sampled from FW 3 at the end  
150 of the 2015 (November 2015) and 2016 (September 2016) wet seasons. Vegetations samples

151 were collected from four to eight randomly placed 0.25 m<sup>2</sup> quadrats adjacent to the identified  
152 sampling locations. Vegetation sampling locations were located at inflow, mid and outflow  
153 regions of the FWs within close proximity to the surface water and soil monitoring locations (Fig  
154 1). Dry homogenized vegetation samples were analyzed for TP, TN and TC content consistent  
155 with U.S. Environmental Protection Agency approved methods (Table 1). Surface water inflow  
156 volume and TP concentrations were retrieved from the South Florida Water Management District  
157 (SFWMD) online database (DBHYDRO; [www.sfwmd.gov/dbhydro](http://www.sfwmd.gov/dbhydro)) for each FW. For purposes  
158 of this data analysis and summary statistics, data reported as less than method detection limit  
159 (MDL) were set to the MDL.

160

#### 161 *Data Analysis*

162 Hydraulic and P loading rates (HLR and PLR, respectively) were calculated based on methods  
163 by Kadlec and Wallace (2009). Inflow structure daily flow rates were determined using the  
164 difference between head-water (upstream) and tail-water (downstream) stage elevations in  
165 combination with structure geometry. Weekly surface water grab total phosphorus samples were  
166 collected at inflow and outflow structures and used to estimate inflow and outflow load amounts.  
167 Hydraulic loading rate were estimated by dividing flow volume and FW area for each FW.  
168 Phosphorus loading rate were estimated using daily TP load divided by FW area.

169 Surface water nutrient concentrations were converted from mass of nutrient per volume  
170 concentration (i.e. mg L<sup>-1</sup>) to a molecular concentration (i.e. mM). Soil, floc and vegetation  
171 nutrient concentrations were converted from a mass of nutrient per mass of soil (i.e. mg kg<sup>-1</sup>) to a  
172 molecular concentration per mass of soil (i.e. mmol kg<sup>-1</sup>). Relationships among surface water,  
173 soil, floc and vegetation nutrients were examined by log-log regression using Siegel repeated

174 median's linear model (Siegel 1982) ('mblm' package). All parameters were log transformed  
175 prior to analysis. Log-Log regression is commonly used in allometric analyses of growth and  
176 biomass where a slope equal to one indicates isometric (proportional) scaling while slopes not-  
177 equal to one indicates allometric (disproportional) scaling. This same approach was used in this  
178 study to test if the proportional relationships (i.e.  $C \times P$ ) are preserved as concentrations change  
179 in the various nutrient pools within each compartment similar to (Cleveland and Liptzin 2007).

180 Surface water (DOC:TP, DOC:TN and TN:TP), soil and floc molar ratios (TC:TP, TC:TN and  
181 TN:TP) were compared between FWs by Kruskal-Wallis rank sum test. To characterize the  
182 relationship between floc and soil along the two-flow path transects, fractional distance  
183 downstream was broken into two categories, inflow to mid-point region ( $<0.5$ ) and mid-point to  
184 outflow region ( $>0.5$ ). Soil and floc TN:TP were compared between FWs and distance  
185 downstream by Kruskal-Wallis rank sum test, separately. Floc and RAS TN:TP were also  
186 compared by spearman's rank sum test by flow path separately.

187 Longitudinal change point analysis was performed on mean surface water, floc and soil nutrient  
188 stoichiometric ratios for data collected in FWs 1 and 3. Surface water nutrient ratios considered  
189 were TN:TP, OC:TP, and OC:TN, similarly floc and RAS nutrient ratios include N:P, C:P and  
190 C:N. Mean nutrient ratios were compared to fractional distance downstream by spearman's rank  
191 sum correlation and rate of change was evaluated using Theil-Sen slope estimator ('zyp'  
192 package)(Bronaugh and Werner 2013). Nutrient stoichiometry change-point detection along the  
193 flow way transects was evaluated using Davies' difference-in-slope test ('segmented'  
194 package)(Vito and Muggeo 2003; Muggeo 2008). Despite only three sampling locations along  
195 the flow path transect for vegetation (Fig 1), spearman's rank sum correlation test was used to  
196 assess changes in absolute nutrient concentrations (i.e. TP, TN and TC) and molar ratio (TC:TP,



197 TC:TN and TN:TP) of vegetation living-AGB along each flow path. All statistical operations  
198 were performed with R© (Ver 3.1.2, R Foundation for Statistical Computing, Vienna Austria),  
199 unless otherwise stated all statistical operations were performed using the base R library. The  
200 critical level of significance was set at  $\alpha=0.05$ .

201

## 202 **Results**

203 A total of five prescribed/managed flow events occurred between August 10<sup>th</sup>, 2015 and  
204 November 22<sup>nd</sup>, 2016 with events ranging from 35 to 63 days between FWs 1 and 3 within STA-  
205 2. During the flow events, daily HLR ranged between 0 (no inflow) to 33.7 cm d<sup>-1</sup> with FW 3  
206 receiving a relatively higher mean HLR of  $3.2 \pm 0.1$  cm d<sup>-1</sup> and higher maximum daily HLR of  
207 33.7 cm d<sup>-1</sup>. Flow-way 1 achieved a mean HLR of  $2.7 \pm 0.07$  cm d<sup>-1</sup> with a daily maximum HLR  
208 of 23.7 cm d<sup>-1</sup>. Observed daily PLR values ranged from 0 (no loading) to 92.9 mg m<sup>-2</sup> d<sup>-1</sup> with  
209 FW 3 received a higher relative load with a mean PLR of  $3.2 \pm 0.1$  mg m<sup>-2</sup> d<sup>-1</sup> and experiencing  
210 the highest daily maximum PLR rate. Flow-way 1 achieved a mean PLR of  $2.6 \pm 0.01$  mg m<sup>-2</sup> d<sup>-1</sup>  
211 with a daily maximum PLR of 66.1 mg m<sup>-2</sup> d<sup>-1</sup> (complete summary of flow event characteristics  
212 can be found in Supplemental Table 1). The daily HLR and PLR observed during this study was  
213 consistent with historic operational loading rates experienced for these FWs to date (Chen et al.  
214 2015).

### 215 *Water column C:N:P dynamics*

216 During this study DOC ranged from 15.1 to 40.2 mg C L<sup>-1</sup>, TP ranged from 6 to 378 µg P L<sup>-1</sup> and  
217 TN ranged from 0.78 to 4.14 mg N L<sup>-1</sup> between the two study FWs. Molar ratios of DOC to TP  
218 ranged from 280 to 14,613, DOC to TN ranged from 9.3 to 24.0 and TN to TP ranged from 16.3

219 to 788.7 (Table 2). Qualitatively, mean DOC, TN and TP concentrations were relatively  
220 comparable (Table 2) between the FWs as expected since they receive the same source water but  
221 experience different loading (HLR and PLR) regimes and dominant vegetative communities.

222 All surface water stoichiometric relationships resulted in statistically significant relationships  
223 with slopes significantly different from one (Table 3) indicating that none of the nutrient pools  
224 proportionally scale. The models between the two FWs diverge drastically in most cases except  
225 for the DOC-TN relationship which is relatively constrained (Fig 2) as indicated by the similar  
226 slopes and intercepts between the two FWs (Table 3). Stoichiometric relationships associated  
227 with TP (i.e. DOC:TP and TN:TP) were not tightly constrained driven largely by the extreme  
228 variability in weekly measurements (Table 2). Stoichiometric ratios of DOC:TP, DOC:TN and  
229 TN:TP (Table 4) were significantly different between the two FWs with FW 3 experiencing  
230 greater DOC:TP and TN:TP values and lower DOC:TN values (Table 2 and Fig 3).

231 Total P, TN and DOC concentrations were negatively correlated with distance downstream  
232 indicating a gradual decline in concentrations along the STA-2 FW 1 flow way transect (Table 5  
233 and Fig 4). Dissolved OC decline the most along the flow way transect followed by TN and TP  
234 (Table 5). Along with significant declines in concentrations along the flow path DOC:TN and  
235 TN:TP significantly increased with no significant change points detected ( $\rho=0.59$  and  $\rho=0.22$ ,  
236 respectively) along the flow way transect. (Table 5). However, DOC:TP did not significantly  
237 change along the flow path and no change point was detected ( $\rho=0.19$ ) despite having the largest  
238 rate of increase between stoichiometric ratios (Table 5). Similar to FW 1, FW 3 TP and TN were  
239 negatively correlated with distance downstream with TN with largest decline along the transects  
240 (Table 5). Meanwhile, in FW 3 DOC was not significantly correlated with distance downstream  
241 (Table 5). All surface water stoichiometric ratios were positively correlated with distance

242 downstream at a similar rate as FW 1 (Table 5) and no change points detected for any of the  
243 stoichiometric ratios (DOC:TP  $\rho=0.08$ ; DOC:TN  $\rho=0.21$ ; TN:TP  $\rho=0.12$ ).

#### 244 *Floc C:N:P dynamics*

245 Percent organic matter (OM), as indicated by LOI, ranged from 12.1 to 91.4% across the FWs  
246 with FW 1 having higher OM in the floc material (Table 2). In addition to having lower OM, FW  
247 3 floc material was more mineral as indicated by TCa concentrations which were several orders  
248 of magnitude greater than concentrations observed in FW 1 (Table 2). Meanwhile, floc TC  
249 concentrations ranged from 160 to 448 g kg<sup>-1</sup> (13,321 to 40,630 mmol kg<sup>-1</sup>), TP concentrations  
250 ranged from 307 to 2,436 mg kg<sup>-1</sup> (9.9 to 78.6 mmol kg<sup>-1</sup>) and TN concentration ranged from 7.8  
251 to 39.4 g kg (651 to 3,280 mmol kg<sup>-1</sup>) across FWs 1 and 3. Floc molar ratios of TC to TP ranged  
252 from 410.9 to 1,369.2, TC to TN ranged from 10.2 to 21.1 and TN to TP ranged from 23.8 to  
253 87.4 (Table 2). Generally, TP concentration was the most variable parameter between and within  
254 sites with coefficients of variance as high as 78% at any given site but overall FW 3 exhibited the  
255 highest overall coefficient of variance with 27% spatial and temporal variability (Table 2).

256 Floc TC-TN and TN-TP models for both FWs and the TC-TP model for FW 3 resulted in slopes  
257 significantly different from one while the TC-TP slope for FW 1 was not significantly different  
258 than one, indicating TC and TP scale proportionally (Table 3). Similar to surface water  
259 stoichiometry models, floc stoichiometry models deviate drastically when comparing the two  
260 FWs except for the TC-TN relationships which are nearly identical and fall along a continuum  
261 (Fig 2) with FW 1 generally having greater TN concentrations in the floc compartment (Table 2).  
262 Floc TC:TP and TC:TN stoichiometry significantly differ between FWs (Table 4) with FW 3  
263 having higher TC:TN and TC:TN ratio (Fig 3), suggesting TP and TN are less constrained  
264 relative to TC. Meanwhile, floc TN:TP was not significantly different between FWs (Table 4)

265 suggesting that even though TP concentrations are highly variable between and within FWs TP  
266 and TN are tightly constrained.

267 Floc TP concentration was negatively correlated with distance downstream along the FW 1  
268 transect at a rate of  $-1531 \text{ mg kg}^{-1} \text{ Distance}^{-1}$  (Fractional Distance, Table 5) indicating a  
269 significant decline in TP concentration along the flow path. Meanwhile, floc TC and TN were  
270 not significantly correlated with distance downstream (Table 5). Floc TC:TP and TN:TP molar  
271 ratios were positively correlated with distance downstream while TC:TN molar ratio did not  
272 exhibit a significant correlation with distance downstream (Table 5). Furthermore, no significant  
273 change points were detected for any stoichiometric ratios along the FW 1 flow way transect  
274 (TC:TP  $\rho=0.13$ ; TC:TN  $\rho=0.78$ ; TN:TP  $\rho=0.07$ ). Along the FW 3 flow way transect, TP, TN,  
275 TC, TC:TN were not significantly correlated with distance downstream (Table 5). While, floc  
276 TC:TP and TN:TP were positively correlated with distance downstream at rates of change  
277 comparable to that of FW 1 (Table 5 and Fig 4). Moreover, no change points were detected in  
278 along the FW 3 flow transect for TC:TP, TC:TN or TN:TP (TC:TP  $\rho=0.12$ ; TC:TN  $\rho=0.16$ ;  
279 TN:TP  $\rho=0.22$ ).

### 280 *Soil C:N:P dynamics*

281 Much like the floc compartment, LOI values in the RAS compartment range from 16.5 to 91.0%  
282 across the study FWs with FW 1 having a higher observed mean LOI value for RAS ( $81.2 \pm 1.4$   
283 %; Table 2). Additionally, FW 3 soils were more mineral in nature with greater TCa  
284 concentrations relative to FW 1 soils (Table 2). Soil TC concentration ranged from 171 to 504 g  
285  $\text{kg}^{-1}$ , TN ranged from 7.7 to 38.2 g  $\text{kg}^{-1}$  and TP ranged from 312 to 1449 mg  $\text{kg}^{-1}$  across FWs 1  
286 and 3 with FW 1 being generally more enriched with nutrients as indicated by qualitatively  
287 greater average concentrations (Table 2). Soil nutrient ratios were generally greater than those

288 observed in the floc compartment with TC:TP values ranging from 534 to 4,061, TC:TN ranged  
289 from 11.6 to 22.2 and TN:TP ranged from 26.0 to 262 (Table 2). Much like the floc  
290 compartment, TP was the most variable parameter as indicated by intra- and inter-site  
291 coefficients of variance reaching as high as 58% at any given site. Overall FW 1 exhibited the  
292 highest overall coefficient of variance with 42% spatial and temporal variability (Table 2).

293 Soil TC-TP and TC-TN models for both FWs and the TN-TP model for FW 3 resulted in slopes  
294 significantly different from one while the TN-TP model for FW 1 was not significantly different  
295 than one, indicating TN and TP ratio for FW 1 scale proportionally (Table 3). Soil TC:TN  
296 significantly differed between FWs (Table 4) with FW 3 having a greater TC:TN ratio (Fig 3).  
297 Meanwhile, TC:TP and TN:TP were not significantly different between FWs (Table 4)  
298 indicating that despite the lack of proportional scaling for TC-TP and TN-TP, P is somewhat  
299 constrained along the flow path between the two FWs.

300 Soil TP concentration was negatively correlated with distance downstream with no change point  
301 detected within FW 1 (Table 5). Within FW 1, soil TC and TN were not significantly correlated  
302 with distance downstream (Table 5). Both TC:TP and TN:TP stoichiometry were not  
303 significantly correlated with distance downstream along the FW 1 flow way transect with no  
304 significant change point detected (TC:TP  $\rho=0.59$ ; TN:TP  $\rho=0.46$ ). Soil TC:TN was negatively  
305 correlated with distance downstream along the FW 1 flow way transect (Table 5) with no change  
306 point detected ( $\rho=0.30$ ). Along the FW 3 flow transect, TN and TC were positively correlated  
307 with distance downstream with a greater rate of change than FW 1 while TP was negatively  
308 correlated with distance downstream at a comparable rate of change downstream relative to FW  
309 1 suggesting similar removal rates between FWs (Table 5). Soil TC:TP was positively correlated  
310 with distance downstream (Table 5) and a significant change point was detected along the FW 3

311 flow way transect (Estimate=0.78,  $\rho < 0.05$ ). Soil TC:TN was negatively correlated with distance  
312 downstream (Table 5) and a significant change point was detected along the FW 3 flow way  
313 transect (Estimate=0.71,  $\rho < 0.05$ ). Soil TN:TP was not significantly correlated with distance  
314 downstream (Table 5), however a significant change point was detected along the FW 3 flow  
315 way transect (Estimate=0.71,  $\rho < 0.05$ )

316 Floc and soil N:P molar ratios were significantly correlated for sites within FW 3 ( $r=0.85$ ,  
317  $\rho < 0.01$ ). In FW 3, the distribution of the data formed what appears to be an S-shaped curve with  
318 sharp transition in floc N:P ratio when soil N:P is approximately 100 (Fig 5), but not in FW 1.  
319 Furthermore, both floc ( $\chi^2=20.41$ ,  $\rho < 0.01$ ) and soil ( $\chi^2=4.67$ ,  $\rho < 0.05$ ) N:P molar ratios were  
320 significantly different along FW 3 between the two distance categories. Within FW 1, floc and  
321 soil N:P was not significantly correlated ( $r=0.28$ ,  $\rho=0.21$ ) and qualitatively the floc-soil  
322 relationship within FW 1 appears to be different than that of FW 3 where the upper arm of the S-  
323 curve is missing for FW 1 (Fig 5). The lack of an “upper arm” in the FW 1 floc-soil relationship  
324 could indicate the floc compartment has not reached saturation or microbial decomposition  
325 dynamics differ. Despite the difference in the floc-soil N:P relationships between the two FWs,  
326 N:P molar ratios were significantly different between the two distance classes in FW 1 for floc  
327 ( $\chi^2=19.44$ ,  $\rho < 0.01$ ) and soil ( $\chi^2=4.35$ ,  $\rho < 0.05$ ).

### 328 *Vegetation C:N:P dynamics*

329 During the vegetation sampling within FW 1 three EAV species were sampled including cattail,  
330 sawgrass and *Nymphaea odorata* Aiton (water lily) with cattails accounting for most of the  
331 samples collected. Within FW 3, a mix of SAV species were sampled including muskgrass,  
332 pondweed and southern naiad with muskgrass being the most common. Plant tissue TP  
333 concentrations from both FWs 1 and 3 ranged from 87.2 to 4,693 mg kg<sup>-1</sup> with vegetation within

334 FW 3 having higher absolute tissue TP concentrations (Table 2). Plant tissue TN concentrations  
335 ranged from 4.0 to 48.7 g kg<sup>-1</sup> and TC concentrations ranged from 186 to 464 g kg<sup>-1</sup> with FW 3  
336 having higher tissue TN and FW 1 having higher tissue TC concentrations (Table 2). Living  
337 AGB molar ratios of TC to TP ranged from 205 to 13,012, TC to TN ranged from 6.4 to 100 and  
338 TN to TP ranged from 4.6 to 146 with FW 1 having higher TC:TP and TC:TN ratios and FWs 3  
339 having higher TN:TP ratios (Table 2). Much like the other compartments, variability in TP was  
340 greatest amongst the other nutrient parameters with an overall coefficient of variance of 82.0%  
341 while between FWs, FW 1 had a higher coefficient of variance with 83.1% and FW 3 having a  
342 coefficient of variance of 72.7%.

343 Much like the other ecosystem compartments living-AGB TC-TP, TC-TN and TN-TP models  
344 for FWs 1 and 3 resulted in slopes significantly different than one (Table 3) suggesting that  
345 nutrient concentrations within vegetation do not proportionally scale. Between FWs, TC-TP and  
346 TC-TN models appear to converge at the higher TP and TN concentrations, respectively (Fig 2).  
347 While TN-TP models between FWs seem to gradually diverge from one another (Fig 2). Living-  
348 AGB TP and TN concentration were negatively correlated while TC concentration was  
349 positively correlated with distance downstream along the FW 1 flow way transect (Table 5).  
350 Meanwhile, living-AGB TC:TP, TC:TN and TN:TP along the FW 1 flow way transect was  
351 positively correlated with distance downstream (Table 5 and Fig 4). Similarly, living-AGB TP  
352 and TN concentrations were negatively correlated with distance downstream along the FW 3  
353 flow way transect (Table 5). Living-AGB TC concentration along the FW 3 flow way transect  
354 was not significantly correlated with distance downstream (Table 5). As observed along the FW  
355 1 flow way transect TC:TP, TC:TN and TN:TP were positively correlated with distance  
356 downstream (Table 5 and Fig 4).

357 **Discussion**

358 *Surface Water Stoichiometric Relationships*

359 (Redfield 1958) focused on the composition of inorganic fractions of C and nutrients of deep  
360 ocean waters. This emphasis on inorganic nutrients have carried forward because of the relative  
361 homogenous reservoir of inorganic nutrients in the deep ocean (Guildford and Hecky 2000).  
362 However, in freshwater ecosystems nutrient availability can be highly variable, analytical  
363 methods can be tenuous and interpreting inorganic nutrient data can be problematic (Guildford  
364 and Hecky 2000; Dodds 2003). Furthermore, biogeochemical cycling of nutrients in freshwater  
365 ecosystems is influenced by the ability of some biota to utilize dissolved and particulate  
366 inorganic and organic fractions with the organic fractions being utilized via enzymatic hydrolysis  
367 (Bergström 2010). Therefore some studies have successfully used total nutrient fractions to  
368 indicate nutrient limiting status and trophic dynamics across the freshwater-to-marine aquatic  
369 continuum (Downing 1997; Guildford and Hecky 2000)

370 The Everglades STAs are optimized to effectively remove P from the water column (Chen et al.  
371 2015). This process is completed through a combination of physical removal and biological  
372 uptake. Physical removal of P is done through settling and entrainment of particulate P while  
373 biological uptake removes P from the water column through metabolic uptake along a given flow  
374 path (Kadlec and Wallace 2009). Therefore, changes in nutrient stoichiometry within and  
375 between FWs (Fig 2 and 4) can be the result of biological or physical configurations of the  
376 treatment system. The extreme variability in aquatic stoichiometric relationships among the  
377 FWs, especially DOC:TP could be attributed to vegetation mediated dynamics, nutrient uptake  
378 and OM decomposition (Fig 2). Flow-way 3 of STA-2 is a SAV dominated system where the  
379 sequestration of P is facilitated partly by the co-precipitation of calcite (Dierberg et al. 2002).



380 Meanwhile, FW 1 is an EAV dominated system where particle entrainment and P mining from  
381 soils by vegetation and microbial decomposition are dominate nutrient uptake mechanisms  
382 (Reddy and DeLaune 2008). This difference in P removal mechanisms could explain the  
383 variability in the water column DOC:TP relationship and to some extent TN:TP where FW 3 is  
384 less reliant on microbial decomposition but rather SAV-geochemical mediated P removal (Fig  
385 2). Another line of evidence is the distance downstream trend in DOC concentrations where  
386 DOC declines along the flow path in FW 1 while FW 3 remains relatively constant (Fig 4). This  
387 difference may indicate microbial consumption of DOC via decomposition of dissolved OM  
388 (DOM) within FW 1 (Qualls and Haines 1992; Cleveland et al. 2004), and is less likely the  
389 product of changes in vegetation, as TC in vegetation declines in FW 3 but not FW 1.

#### 390 *Soil Stoichiometric Relationships*

391 Redfield (1958) concluded that the elemental composition of plankton was “*uniform in a*  
392 *statistical sense...*”. Several studies have taken this approach to explain the relatively consistent  
393 elemental composition in other ecosystems and ecosystem compartments (Cleveland and Liptzin  
394 2007; Xu et al. 2013). Cleveland and Liptzin (2007) determined that much like marine plankton  
395 and oceanic water, soil and soil microbial biomass are well-constrained at the global scale across  
396 forest and grassland ecosystems. Despite significant differences in nutrient stoichiometry  
397 between forest and grassland ecosystems, Cleveland and Liptzin (2007) concluded that  
398 similarities in soil and microbial element ratios among sites and across large scales were more  
399 apparent than different. Xu et al. (2013) presented comparable results with a larger dataset  
400 spanning several other ecosystems including natural wetlands and concluded that soil and  
401 microbial nutrient stoichiometry vary widely among ecosystems. Cleveland and Liptzin (2007)  
402 estimated the “Redfield-like” stoichiometric ratios of C, N and P in soil as 186:13:1, while Xu et

403 al. (2013) estimated a global average soil C:N:P of 287:17:1. Additionally, Xu et al. (2013)  
404 demonstrated the soil stoichiometric ratios of natural wetlands to be 1347:72:1. It is clear that  
405 stoichiometric relationships in soil are variable between ecosystems as presented by Cleveland  
406 and Liptzin (2007) and Xu et al. (2013) with C being the most variable stoichiometric component  
407 along the ecosystem continuum.

408 The stoichiometric relationships apparent in the Everglades STAs lacks the degree of  
409 proportional (allometric) scaling (this study) and diverges from the “Redfield-like” relationships  
410 demonstrated in previous studies at an ecosystem and global scale (Cleveland and Liptzin 2007;  
411 Xu et al. 2013). However, this study provides a unique case for applying stoichiometric  
412 relationships to understand nutrient cycling and transformations between soil and water column  
413 along an enriched nutrient gradient. Unlike relationships presented by prior studies C and P  
414 concentrations were not well-constrained (Fig 2) between EAV and SAV communities and  
415 exhibit a strong non-linear relationship despite sharing the same source water. The response of C  
416 and P in the Everglades ecosystem is driven largely by the P limiting nature of the natural system  
417 combined with high loading of P from upstream sources (Chen et al. 2015). Meanwhile, C and  
418 N dynamics are somewhat constrained (Table 4) and following a near linear relationship (Fig 2)  
419 in the soil compartment. Within the Everglades the majority of TN is comprised of organic  
420 nitrogen as indicated by the strong near-linear relationship with C and N for most compartments  
421 (Fig 2) (Julian et al. 2016b). Overall the allometric (disproportional) relationships between C, N  
422 and P suggested the relative decoupling of P as OM accumulation driven by the rapid  
423 consumption of inorganic P (Corstanje et al. 2016), the decomposition of OM, and the utilization  
424 of labile organic P as indicated by changes in enzyme activities along the treatment FW (Inglett,  
425 *et al., unpublished data*). This decoupling could potentially indicate a more efficient use of P

426 release from the organic pools along the flow path gradients and/or the interaction of mineral and  
427 organic pools as in the case of STA-2 FW 3 (Supplemental Fig 2). This decoupling of P cycling  
428 from OM accumulation is also hypothesized to occur in forested ecosystems where P is often  
429 limiting (Johnson et al. 2003; Cleveland and Liptzin 2007).

430 The stoichiometric relationships apparent in the STAs are consistent with relationships observed  
431 within the Everglades marsh (Julian et al. 2016a). In addition to direct loading, nutrient inputs in  
432 the form of senescent plant material can play a significant role in soil biogeochemistry,  
433 especially toward the back-end of the treatment FW where external inputs are reduced and  
434 internal loading drives nutrient cycling. The role of litter fall and its decomposition plays a  
435 significant role in internal nutrient cycling by enriching the soil OM through initially increasing  
436 both C and N concentration. Litter N is known to be conserved during decomposition processes  
437 ultimately enriching the soil below while C is lost due to microbial respiration. As litter  
438 decomposes soil TN concentrations increase, thereby soil TC:TN ratios decrease (Melillo et al.  
439 1989; Julian et al. 2016a). During this study soil and floc TC:TN varied along flow path (Table 4  
440 and Fig 4) where soil TC:TN values begin to increase toward the back third of the FW 3  
441 suggesting a change in biogeochemical drivers such as enzyme activity microbial composition  
442 (*Inglett, et al., unpublished data*), substrate composition and deposition environment (i.e. redox,  
443 electron acceptor availability, etc.).

444 Unlike the conservative nature of N, P is rapidly cycled with internal nutrient regeneration from  
445 OM decomposition being more important than external inputs (Verhoeven et al. 1988).  
446 Phosphorus enrichment reduces net nutrient regeneration from senescent litter but increases  
447 nutrient regeneration in soil (Newman et al. 2001) suggesting that P-enrichment accelerates  
448 decomposition by increasing microbial activity. Newman et al. (2001) also observed soil TC:TN

449 values indicating the potential for N mineralization which with the addition of P would alleviate  
450 P-limited microbial activity thereby releasing inorganic N via mineralization of organic matter.  
451 As demonstrated by changes along the flow paths (Table 5) and the variability of nutrient  
452 availability (Table 2 and Fig 4), biogeochemical cycling and contributions from different  
453 ecosystem compartments can be variable along the flow-paths as P concentrations are reduced  
454 lowering the enrichment potential. Furthermore, soil C:N values significantly decline (Table 5)  
455 along the flow paths suggesting the potential for N-mineralization which could imply differential  
456 nutrient limitations and mineralization processes along the flow path. This is especially apparent  
457 in FW 3, an SAV dominated community suggesting vegetation dynamics drive can influence  
458 biogeochemical cycling of nutrients when comparing the two flow paths.

459 Soils are long term integrators of environmental conditions where nutrient concentrations and  
460 availabilities are driven by external inputs (i.e. loading) and the interaction of biota and microbial  
461 communities dictate biogeochemical cycling (DeBusk and Reddy 2003). Moreover, nutrient  
462 concentrations and availability can significantly vary along environmental gradients (i.e. flow,  
463 vegetations, soil type) and spatial scales. Variability of nutrient stoichiometric estimates are  
464 apparent between local (i.e. STA; this study), ecosystem (i.e. Natural Wetland; Xu et al. 2013)  
465 and global scales (Cleveland and Liptzin 2007; Xu et al. 2013). This continuum of spatial scale  
466 (fine to coarse) is contrasted by a temporal component as indicated by net ecosystem  
467 productivity with tropical and subtropical ecosystems typically have longer periods of warmer  
468 conditions and prolonged photoperiods which facilitates longer and more frequent growing  
469 seasons of comparable ecosystems in more temperate regions which can significant influence  
470 biogeochemical cycling rates (Kadlec and Wallace 2009). Given the ecosystem level biophysical

471 difference between tropical and temperate ecosystems, nutrient, cycling and demand will vary  
472 along this continuum (Kadlec and Wallace 2009; Xu et al. 2013).

473

#### 474 *Soil – Floc Interaction and Stoichiometry*

475 Floc is a complex matrix of microbes, organic particles (i.e. cellular detritus) and inorganic  
476 particles (clays and silts) with substantial inter-floc spaces analogous to pore space in soils are  
477 formed from a variety of physical, chemical and biological processes (Droppo 2001). In the  
478 Everglades system, floc material is largely derived from senescing periphyton and macrophytes  
479 with very little to no terrigenous sediments (Noe et al. 2001, 2003). This matrix of biologic,  
480 chemical and geologic material is ecologically important in aquatic systems due to its ability to  
481 act as a source or sink of nutrients to the overlying water column ultimately influencing a  
482 variety of biogeochemical processes including nutrient cycling primarily through microbial  
483 activity. Furthermore floc represents the beginning of soil OM diagenesis in natural wetland  
484 ecosystems (Noe et al. 2003; Neto et al. 2006).

485 As observed elsewhere, floc and soil represent stoichiometric intermediaries between microbial  
486 and higher plant end-members. (Neto et al. 2006) evaluated floc and soil C:N ratios along a  
487 freshwater-to-marine transect suggesting a mixed source of OM to these compartments with a  
488 decoupling of C to N suggesting variable remineralization rates in soil relative to floc. In our  
489 study, floc and soil follow the same pattern as (Neto et al. 2006) in that N:P ratios of floc and soil  
490 are an apparent mixture of microbial biomass (TN:TP < 14; Xu et al. 2013) and EAV (TN:TP >  
491 45; Table 2) or SAV (TN:TP > 60; Table 2). Additionally, this mixing is accompanied by a co-  
492 variate of distance downstream (Fig 5) where floc TN:TP values in the inflow-to-mid region of

493 the treatment FW (fractional distance  $<0.5$ ) are generally lower than TN:TP values in the mid-to-  
494 outflow region (fractional distance  $>0.5$ ) potentially indicating shifts in OM decomposition or  
495 selective nutrient removal processes (Fig 5). Floc and soil TN:TP lacked any correlation  
496 potentially indicating selective removal or variable nutrient remineralization rates in FW 1 while  
497 in FW 3 floc and soil TN:TP were significantly correlated again suggesting variability in nutrient  
498 removal processes but also potential variability in N or P remineralization rates driven by  
499 different microbial communities and enzyme activities (*Inglett, et al., unpublished data*).

#### 500 *Conclusion and Further Research.*

501 Prior studies of stoichiometry suggest that the relationship between C and nutrients is tightly  
502 constrained and C:N:P stoichiometric relationships are relatively constrained and consistent with  
503 elemental composition of dominate phototrophs (i.e. algae and phytoplankton) in the water  
504 column and microbial biomass in soil. However, at a finer scale exemplified in this study  
505 nutrient stoichiometric relationship within treatment wetlands potentially decouple through  
506 processes such as enrichment, disruption of biotic-feedback loops, variable mineralization rates  
507 or selective removal of water column constituents via biotic uptake or physical settling. These  
508 processes translate across floc, soil and vegetation where stoichiometric relationship vary  
509 between compartments driven by biotic and physical processes.

510 At the onset of this study three hypotheses were suggested, the first hypothesis that nutrient  
511 stoichiometry was tightly constrained across ecosystem compartments was rejected as nutrient  
512 concentrations did not proportionally in each ecosystem compartment or study FW with a few  
513 exceptions (FW 1 Floc TC-TP and FW 1 Soil TN-TP). The second hypothesis related to  
514 observed shifts in nutrient stoichiometry due to ecosystem level biogeochemical processes was  
515 accepted due to the significant changes of nutrient stoichiometry relative to distance downstream

516 and between flow paths were apparent. The final hypothesis that stoichiometry between  
517 ecosystem compartments significantly differed between flow paths was accepted as each flow  
518 path driven by its biota cycle and retain nutrients differently, especially relative to C and N  
519 dynamics. Future studies should address the potential for preferential removal and utilization of  
520 nutrients for different substrates and organism (uptake and mining in macrophytes,  
521 immobilization of nutrients), perhaps coupled with a modeling study that addresses the resulting  
522 accumulation in vegetation, floc and soil following the nutrient driven changes in  
523 biogeochemical cycles.

#### 524 **Acknowledgements**

525 We would like to SFWMD and UF Wetland Biogeochemistry Laboratory staff members for field  
526 and analytical support. We would also like to thank Mark Brenner, K. Ramesh Reddy, Odi  
527 Villapando, Delia Ivanoff and the anonymous peer reviewer(s) and editor(s) for their efforts and  
528 constructive review of this manuscript. Financial support for this project was provided by the  
529 South Florida Water Management District (Contract #4600003031).

#### 530 **Conflict of Interest Statement**

531 The authors declare that they have no conflict of interest.

532

#### 533 **References**

- 534 Bergström A-K (2010) The use of TN:TP and DIN:TP ratios as indicators for phytoplankton  
535 nutrient limitation in oligotrophic lakes affected by N deposition. *Aquat Sci* 72:277–281 .  
536 doi: 10.1007/s00027-010-0132-0
- 537 Billett MF, Moore TR (2008) Supersaturation and evasion of CO<sub>2</sub> and CH<sub>4</sub> in surface waters at  
538 Mer Bleue peatland, Canada. *Hydrol Process* 22:2044–2054 . doi: 10.1002/hyp.6805

- 539 Bronaugh DB, Werner A (2013) Zhang + Yue-Pilon trends package. CRAN R-Project
- 540 Bruland GL, Osborne TZ, Reddy KR, et al (2007) Recent Changes in Soil Total Phosphorus in  
541 the Everglades: Water Conservation Area 3. *Environ Monit Assess* 129:379–395 . doi:  
542 10.1007/s10661-006-9371-x
- 543 Chen H, Ivanoff D, Pietro K (2015) Long-term phosphorus removal in the Everglades  
544 stormwater treatment areas of South Florida in the United States. *Ecol Eng* 79:158–168 .  
545 doi: 10.1016/j.ecoleng.2014.12.012
- 546 Chimney M (2017) Performance of the Everglades Stormwater Treatment Areas. In: 2017 South  
547 Florida Environmental Report. South Florida Water Management District, West Palm  
548 Beach, FL
- 549 Clesceri LS, Greenberg AE, Eaton AD (eds) (1998) Standard Methods for the Examination of  
550 Water and Wastewater. American Public Health Association
- 551 Cleveland CC, Liptzin D (2007) C:N:P stoichiometry in soil: is there a “Redfield ratio” for the  
552 microbial biomass? *Biogeochemistry* 85:235–252 . doi: 10.1007/s10533-007-9132-0
- 553 Cleveland CC, Neff JC, Townsend AR, Hood E (2004) Composition, Dynamics, and Fate of  
554 Leached Dissolved Organic Matter in Terrestrial Ecosystems: Results from a  
555 Decomposition Experiment. *Ecosystems* 7: . doi: 10.1007/s10021-003-0236-7
- 556 Corstanje R, Grafius DR, Zawadzka J, et al (2016) A datamining approach to identifying spatial  
557 patterns of phosphorus forms in the Stormwater Treatment Areas in the Everglades, US.  
558 *Ecol Eng* 97:567–576 . doi: 10.1016/j.ecoleng.2016.10.003
- 559 Davis S, Ogden JC (1994) Everglades: The Ecosystem and Its Restoration. CRC Press, Boca  
560 Raton, FL
- 561 DeBusk WF, Reddy KR (2003) Nutrient and hydrology effects on soil respiration in a northern  
562 Everglades marsh. *J Environ Qual* 32:702–710
- 563 Dierberg FE, DeBusk TA, Jackson SD, et al (2002) Submerged aquatic vegetation-based  
564 treatment wetlands for removing phosphorus from agricultural runoff: response to  
565 hydraulic and nutrient loading. *Water Res* 36:1409–1422
- 566 Dodds WK (2003) Misuse of inorganic N and soluble reactive P concentrations to indicate  
567 nutrient status of surface waters. *J North Am Benthol Soc* 22:171–181
- 568 Dodds WK, Smith VH, Lohman K (2002) Nitrogen and phosphorus relationships to benthic algal  
569 biomass in temperate streams. *Can J Fish Aquat Sci* 59:865–874 . doi: 10.1139/f02-063
- 570 Downing JA (1997) Marine nitrogen: phosphorus stoichiometry and the global N: P cycle.  
571 *Biogeochemistry* 37:237–252



- 572 Droppo IG (2001) Rethinking what constitutes suspended sediment. *Hydrological Processes* 15:1551–  
573 1564 . doi: 10.1002/hyp.228
- 574 Geider R, La Roche J (2002) Redfield revisited: variability of C:N:P in marine microalgae and  
575 its biochemical basis. *Eur J Phycol* 37:1–17 . doi: 10.1017/S0967026201003456
- 576 Glibert PM (2012) Ecological stoichiometry and its implications for aquatic ecosystem  
577 sustainability. *Curr Opin Environ Sustain* 4:272–277 . doi: 10.1016/j.cosust.2012.05.009
- 578 Guildford SJ, Hecky RE (2000) Total nitrogen, total phosphorus, and nutrient limitation in lakes  
579 and oceans: Is there a common relationship? *Limnol Oceanogr* 45:1213–1223 . doi:  
580 10.4319/lo.2000.45.6.1213
- 581 Johnson AH, Frizano J, Vann DR (2003) Biogeochemical implications of labile phosphorus in  
582 forest soils determined by the Hedley fractionation procedure. *Oecologia* 135:487–499 .  
583 doi: 10.1007/s00442-002-1164-5
- 584 Julian P, Gu B, Wright AL (2016a) Mercury Stoichiometric Relationships in a Subtropical  
585 Peatland. *Water Air Soil Pollut* 227:472 . doi: 10.1007/s11270-016-3180-9
- 586 Julian P, Payne GG, Xue SK (2016b) Chapter 3A: Water Quality in the Everglades Protection  
587 Areas. In: 2016 South Florida Environmental Report. South Florida Water Management  
588 District, West Palm Beach, FL
- 589 Juston J, DeBusk TA (2006) Phosphorus mass load and outflow concentration relationships in  
590 stormwater treatment areas for Everglades restoration. *Ecol Eng* 26:206–223 . doi:  
591 10.1016/j.ecoleng.2005.09.011
- 592 Kadlec RH, Wallace SD (2009) *Treatment wetlands*. CRC Press, Boca Raton, FL
- 593 Kayranli B, Scholz M, Mustafa A, Hedmark Å (2010) Carbon Storage and Fluxes within  
594 Freshwater Wetlands: a Critical Review. *Wetlands* 30:111–124 . doi: 10.1007/s13157-  
595 009-0003-4
- 596 Lenton TM, Watson AJ (2000) Redfield revisited: 1. Regulation of nitrate, phosphate, and  
597 oxygen in the ocean. *Glob Biogeochem Cycles* 14:225–248
- 598 McClain M, Boyer E, Lisa Dent C, et al (2003) Biogeochemical Hot Spots and Hot Moments At  
599 the Interface of Terrestrial and Aquatic Ecosystems. *Ecosystems* 6:301–3012 . doi:  
600 10.1007/s10021-003-0161-9
- 601 Melillo JM, Aber JD, Linkins AE, et al (1989) Carbon and nitrogen dynamics along the decay  
602 continuum: Plant litter to soil organic matter. *Ecol Arable Land — Perspect Chall* 53–62
- 603 Muggeo VM (2008) Segmented: an R package to fit regression models with broken-line  
604 relationships. *R News* 8:20–25

- 605 Neto RR, Mead RN, Louda JW, Jaffé R (2006) Organic Biogeochemistry of Detrital Flocculent  
606 Material (Floc) in a Subtropical, Coastal Wetland. *Biogeochemistry* 77:283–304 . doi:  
607 10.1007/s10533-005-5042-1
- 608 Newman S, Kumpf H, Laing JA, Kennedy WC (2001) Decomposition responses to phosphorus  
609 enrichment in an Everglades (USA) slough. *Biogeochemistry* 54:229–250 . doi:  
610 10.1023/A:1010659016876
- 611 Newman S, Osborne TZ, Hagerthey SE, et al (2017) Drivers of landscape evolution: multiple  
612 regimes and their influence on carbon sequestration in a sub-tropical peatland. *Ecol*  
613 *Monogr* 87:578–599 . doi: 10.1002/ecm.1269
- 614 Newman S, Schuette J, Grace JB, et al (1998) Factors influencing cattail abundance in the  
615 northern Everglades. *Aquat Bot* 60:265–280 . doi: 10.1016/S0304-3770(97)00089-2
- 616 Noe GB, Childers DL, Jones RD (2001) Phosphorus Biogeochemistry and the Impact of  
617 Phosphorus Enrichment: Why Is the Everglades so Unique? *Ecosystems* 4:603–624 . doi:  
618 10.1007/s10021-001-0032-1
- 619 Noe GB, Scinto LJ, Taylor J, et al (2003) Phosphorus cycling and partitioning in an oligotrophic  
620 Everglades wetland ecosystem: a radioisotope tracing study. *Freshw Biol* 48:1993–2008 .  
621 doi: 10.1046/j.1365-2427.2003.01143.x
- 622 Osborne TZ, Bruland GL, Newman S, et al (2011) Spatial distributions and eco-partitioning of  
623 soil biogeochemical properties in the Everglades National Park. *Environ Monit Assess*  
624 183:395–408 . doi: 10.1007/s10661-011-1928-7
- 625 Pan Y, Stevenson RJ, Vaithyanathan P, et al (2000) Changes in algal assemblages along  
626 observed and experimental phosphorus gradients in a subtropical wetland, U.S.A. *Freshw*  
627 *Biol* 44:339–353 . doi: 10.1046/j.1365-2427.2000.00556.x
- 628 Qualls RG, Haines BL (1992) Biodegradability of dissolved organic matter in forest throughfall,  
629 soil solution, and stream water. *Soil Sci Soc Am J* 56:578–586
- 630 Qualls RG, Richardson CJ (2000) Phosphorus enrichment affects litter decomposition,  
631 immobilization, and soil microbial phosphorus in wetland mesocosms. *Soil Sci Soc Am J*  
632 64:799–808
- 633 Reddy KR, DeLaune RD (2008) *Biogeochemistry of wetlands: science and applications*. CRC  
634 Press, Boca Raton, FL
- 635 Redfield AC (1934) On the proportions of organic derivations in seawater and their relation to  
636 the composition of plankton (reprint). *Benchmark Pap Ecol* 1:
- 637 Redfield AC (1958) The biological control of chemical factors in the environment. *Am Sci*  
638 46:230A–221

- 639 SFWMD (2015) Chemistry Laboratory Quality Manual. South Florida Water Management  
640 District, West Palm Beach, FL
- 641 Siegel AF (1982) Robust regression using repeated medians. *Biometrika* 69:242–244
- 642 US EPA (2007) Method 6010C: Inductively coupled plasma-atmoic emission spectrometry. US  
643 Environmental Protection Agency, Washington DC
- 644 Verhoeven JTA, Kooijman MM, Wirdum GV (1988) Mineralization of N and P along a trophic  
645 gradient in a freshwater mire. *Biogeochemistry* 6:31–43 . doi: 10.1007/BF00002931
- 646 Vito M, Muggeo R (2003) Estimating regression models with unknown break-points. *Stat Med*  
647 22:3055–3071 . doi: 10.1002/sim.1545
- 648 Xu X, Thornton PE, Post WM (2013) A global analysis of soil microbial biomass carbon,  
649 nitrogen and phosphorus in terrestrial ecosystems. *Glob Ecol Biogeogr* 22:737–749 . doi:  
650 10.1111/geb.12029
- 651 Zhan S, Wang Y, Zhu Z, et al (2017) Nitrogen enrichment alters plant N: P stoichiometry and  
652 intensifies phosphorus limitation in a steppe ecosystem. *Environ Exp Bot* 134:21–32 .  
653 doi: 10.1016/j.envexpbot.2016.10.014
- 654

## 655 **Figures and Tables**

656 Figure 1. Surface water, soil and vegetation monitoring locations within Everglades Stormwater  
657 Treatment Area-2 cells 1 (right) and 3 (left). Cell 1 is predominately emergent vegetation and  
658 Cell 3 is predominately submerged aquatic vegetation. Operationally these cells are identified as  
659 flow-way 1 and 3, respectively.

660 Figure 2. Relationships between carbon (organic carbon in surface water), nitrogen and  
661 phosphorus in surface water, soil flocculent material (floc), recently accreted soil, and dominate  
662 vegetation aboveground living biomass for STA-2 flow-ways (FWs) 1 and 3. Relative  
663 correlation from Spearman's rank sum correlation indicated by lines through the data by Thiel-  
664 Sen linear model estimate.

665 Figure 3. Boxplot comparing stoichiometric relationships between study flow-ways (FWs) for  
666 surface water, soil flocculent material (floc), recently accreted soil, and dominate vegetation  
667 aboveground living biomass.

668 Figure 4. Mean  $\pm$  SE phosphorus (TP), nitrogen (TN) and associated molar ratios by fractional  
669 distance downstream for STA-2 flow-ways (FWs) 1 and 3. Carbon is expressed as dissolved  
670 organic carbon (DOC) for surface water and total carbon (TC) for soil flocculent material (floc),  
671 recently accreted soil and vegetation living aboveground biomass. Note scales differ across each  
672 ecosystem compartment and parameter.

673 Figure 5. Comparison of floc and soil TN:TP molar ratio with location along the flow-way  
674 identified by size of point (i.e. larger point further down flow path) and distance categories.

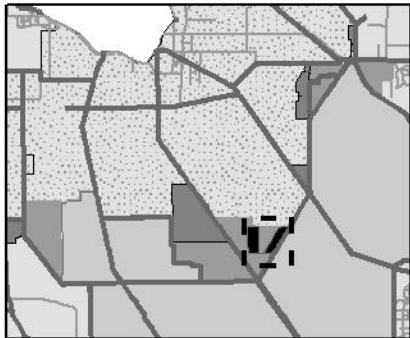

- ✕ Vegetation Monitoring Location
- ✚ Water Quality Monitoring Location
- Soil Monitoring Location
- ▭ STA-2 Study Cells
- Canal
- Water Control Structures
- ▨ Everglades Agricultural Area
- ▩ Everglades Protection Area

Miles

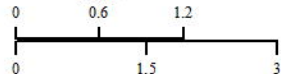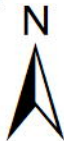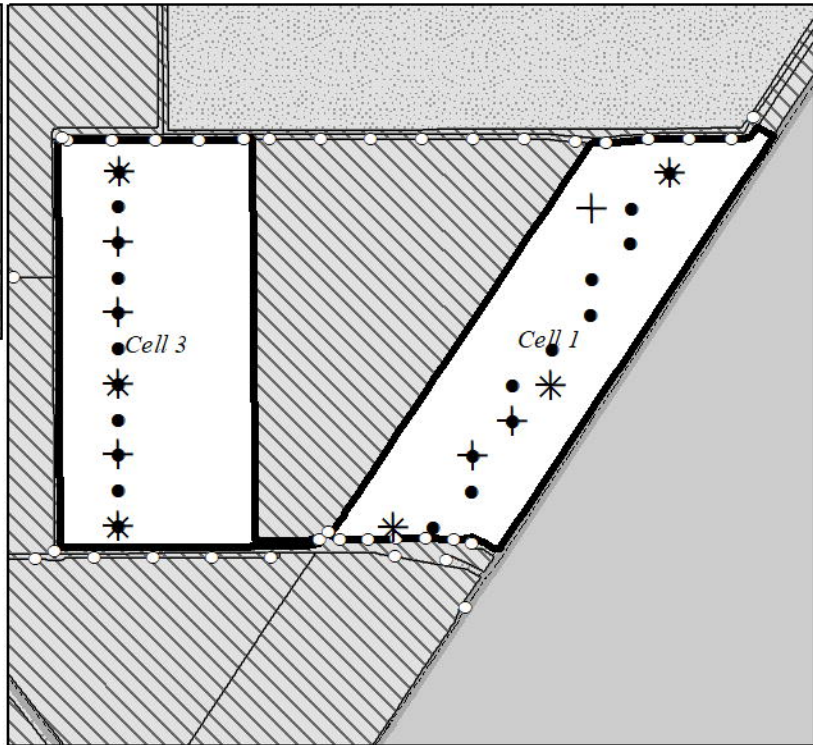

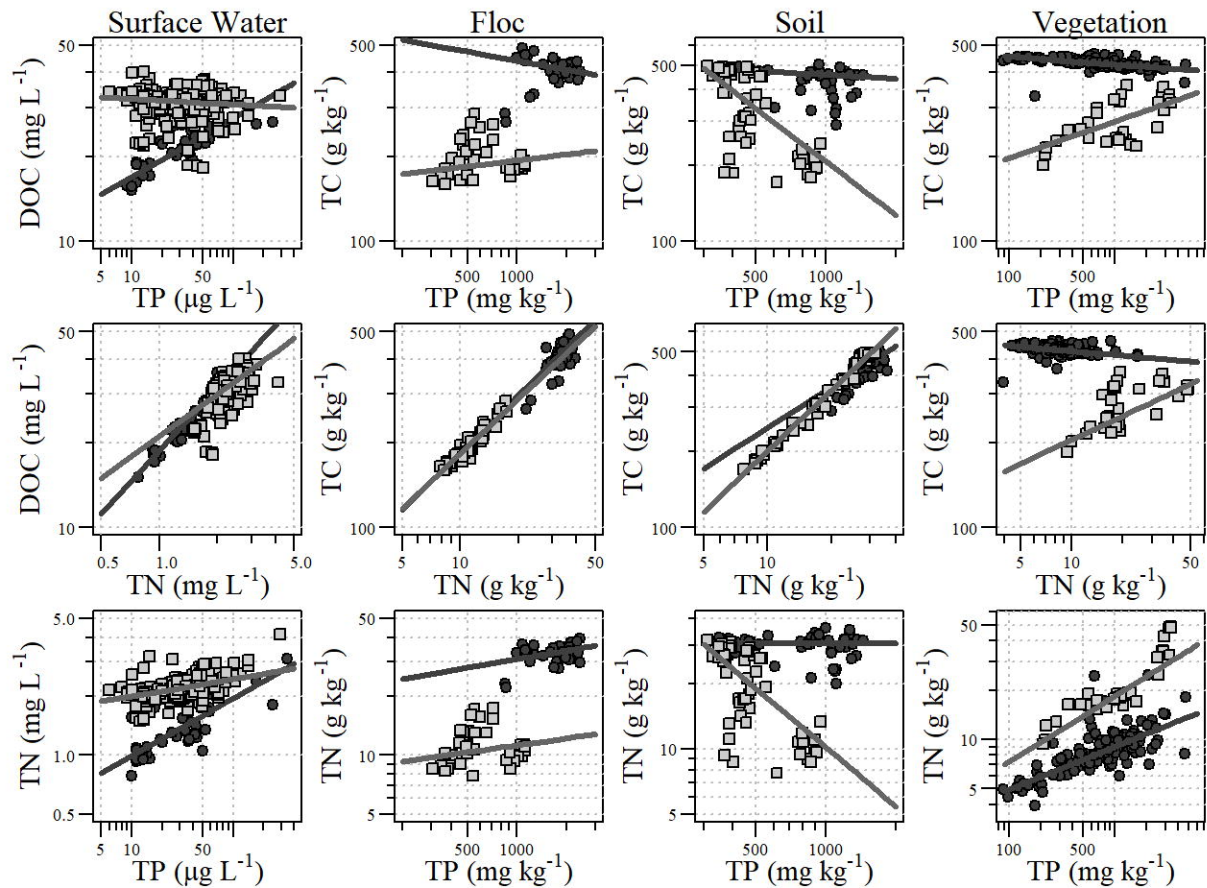

● FW 1 □ FW 3

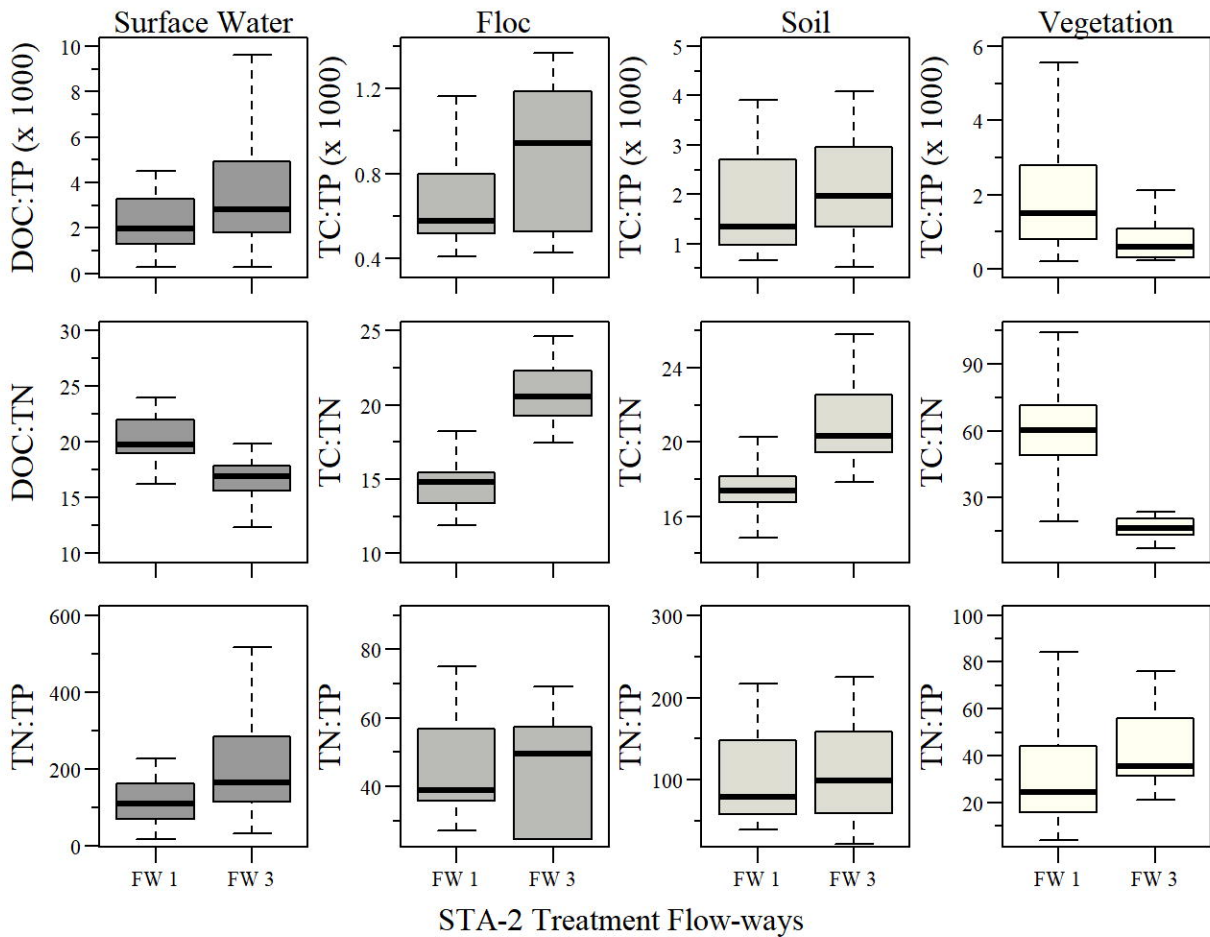



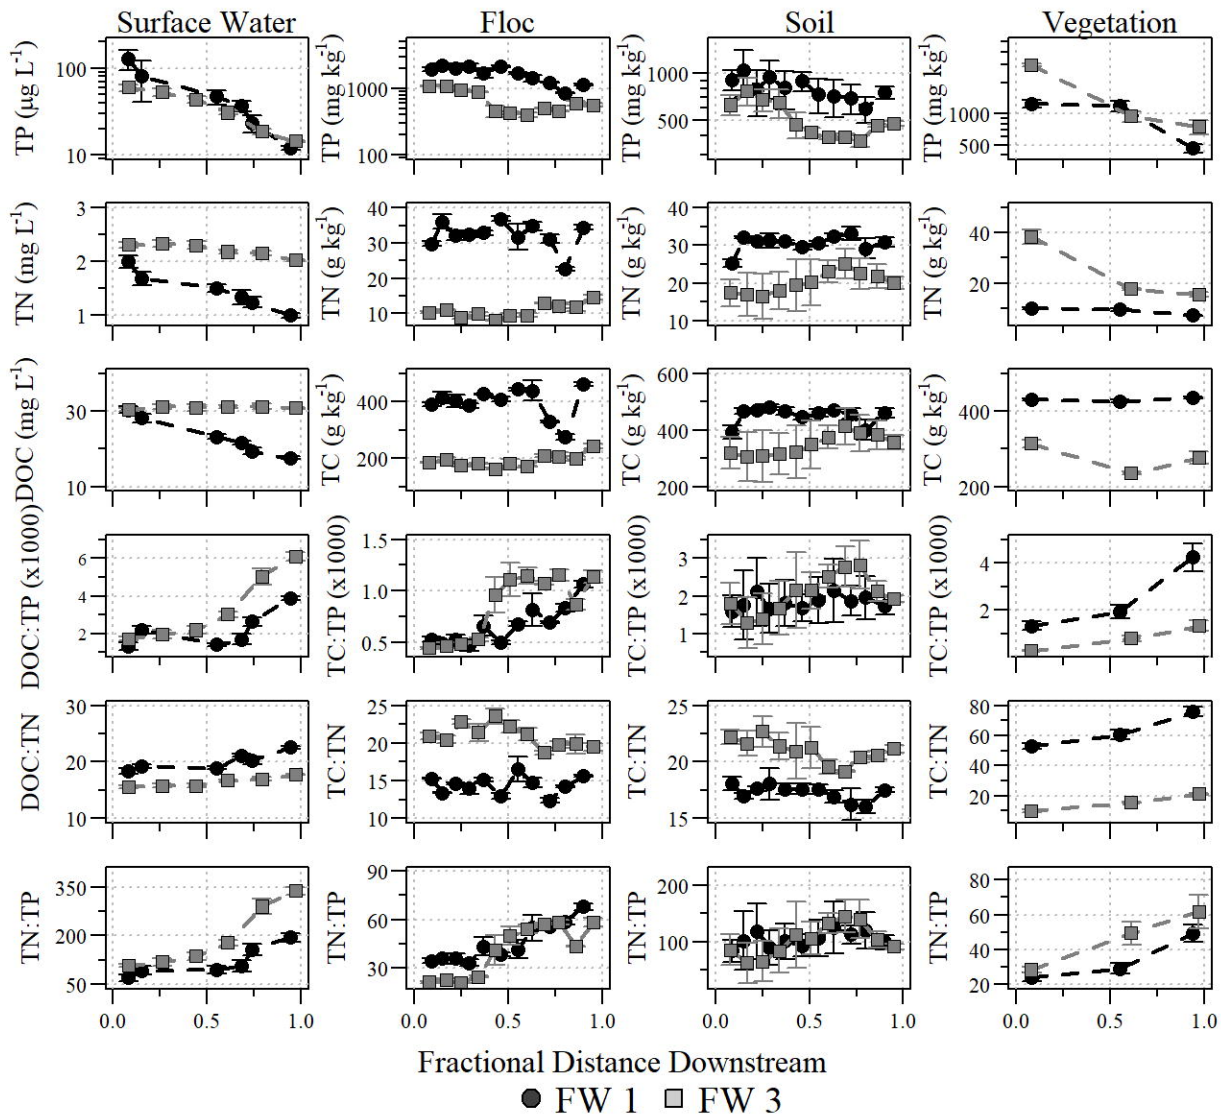



FW 1

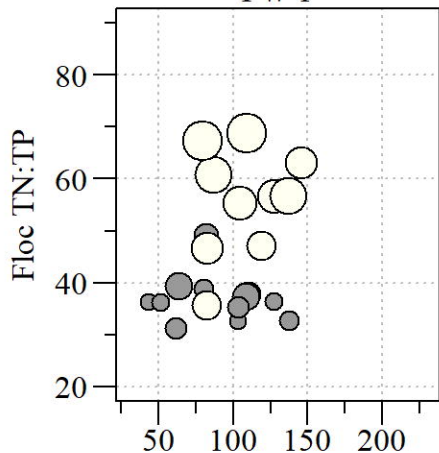

FW 3

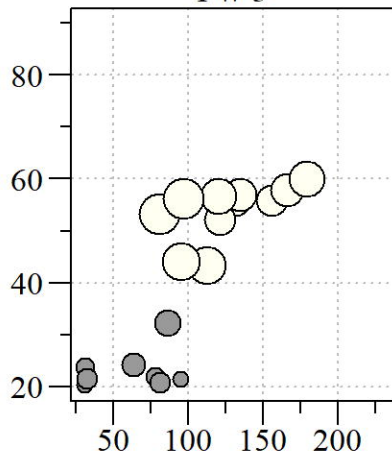

RAS TN:TP

Fractional Distance Downstream

 $\bullet <0.50$   $\circ >0.50$

Table 1. Summary of parameters, matrices and analytical methods used for this study. Additional parameters were collected but not used in this study. All analytical methods are consistent with Florida Department of Environmental Protection or U.S. Environmental Protection Agency Standard Operating Procedures and methods.

| <b>Matrix</b>       | <b>Parameter</b>                | <b>Abbreviation</b> | <b>Analytical Method</b> | <b>Method</b>          |
|---------------------|---------------------------------|---------------------|--------------------------|------------------------|
| Surface Water       | Total Phosphorus                | TP                  | SM4500PF                 | Clesceri et al. (1998) |
|                     | Total Nitrogen                  | TN                  | SM4500NC                 | Clesceri et al. (1998) |
|                     | Dissolved Organic Carbon        | DOC                 | SM5310B                  | Clesceri et al. (1998) |
| Soil and Vegetation | Loss-on-ignition <sup>1,2</sup> | LOI                 | Calculation <sup>2</sup> | ---                    |
|                     | Total Phosphorus                | TP                  | SM4500PF                 | Clesceri et al. (1998) |
|                     | Total Nitrogen                  | TN                  | SFWMD 3200               | SFWMD (2015)           |
|                     | Total Carbon                    | TC                  | SFWMD 3200               | SFWMD (2015)           |
|                     | Total Calcium <sup>1</sup>      | TCa                 | EPA 6010C                | US EPA (2007)          |

<sup>1</sup> Loss-on-ignition and total calcium was assessed for soil components only.

<sup>2</sup> Loss-on-ignition was calculated from the difference between 100% and percent ash determined by the analytical method identified as SFWMD 1610 (SFWMD 2015).

Table 2. Summary statistics for parameters and matrices used in this study of samples collected along the Cell 1 and 3 flow-path transect within Stormwater Treatment Area-2. Summary statistics include mean, standard error, range, and coefficient of variance. Matrices include surface water, soil flocculent material, recently accreted soil and living aboveground biomass of sampled vegetation.

| Matrix                        | Parameter (Units)                              | Flow-way 1      |             |                | Flow-way 3       |             |      |
|-------------------------------|------------------------------------------------|-----------------|-------------|----------------|------------------|-------------|------|
|                               |                                                | Mean $\pm$ SE   | Range       | CV             | Mean $\pm$ SE    | Range       | CV   |
| Surface Water                 | Dissolved Organic Carbon (mg L <sup>-1</sup> ) | 23.2 $\pm$ 0.7  | 15.1 - 35.6 | 23.6           | 30.9 $\pm$ 0.2   | 18.2 - 40.2 | 10.7 |
|                               | Total Phosphorus ( $\mu$ g L <sup>-1</sup> )   | 54.8 $\pm$ 9.6  | 9.0 - 378   | 145.1          | 35.1 $\pm$ 1.8   | 6.0 - 293   | 82.9 |
|                               | Total Nitrogen (mg L <sup>-1</sup> )           | 1.5 $\pm$ 0.1   | 0.8 - 3.1   | 32.4           | 2.2 $\pm$ 0.02   | 1.5 - 4.1   | 13.8 |
|                               | DOC:TP (molar)                                 | 2270 $\pm$ 138  | 280 - 4527  | 51.1           | 3545 $\pm$ 141   | 290 - 14613 | 66.3 |
|                               | DOC:TN (molar)                                 | 20.1 $\pm$ 0.3  | 12.8 - 24.0 | 10.8           | 16.6 $\pm$ 0.1   | 9.3 - 19.8  | 10.4 |
|                               | TN:TP (molar)                                  | 118 $\pm$ 7.8   | 16.3 - 342  | 54.4           | 206 $\pm$ 7.7    | 31.2 - 788  | 60.4 |
|                               | Chlorophyll-A ( $\mu$ g L <sup>-1</sup> )      | 5.3 $\pm$ 0.5   | 1.4 - 24.0  | 81.8           | 11.7 $\pm$ 0.9   | 0.03 - 68.8 | 125  |
| Floc                          | LOI (%)                                        | 76.4 $\pm$ 2.1  | 38.8 - 91.4 | 15.8           | 22.7 $\pm$ 1.2   | 12.1 - 40.5 | 32.1 |
|                               | Total Phosphorus (mg kg <sup>-1</sup> )        | 1698 $\pm$ 81.8 | 844 - 2436  | 28.1           | 642.1 $\pm$ 43.8 | 307 - 1118  | 40.3 |
|                               | Total Nitrogen (g kg <sup>-1</sup> )           | 32.8 $\pm$ 0.7  | 22.0 - 39.4 | 11.9           | 11.4 $\pm$ 0.4   | 7.8 - 17.4  | 22.5 |
|                               | Total Carbon (g kg <sup>-1</sup> )             | 406 $\pm$ 8.6   | 265 - 488   | 12.3           | 199 $\pm$ 5.4    | 160 - 283   | 15.9 |
|                               | TC:TP (molar)                                  | 671 $\pm$ 38.6  | 410 - 1165  | 33.5           | 919 $\pm$ 55.0   | 426 - 1369  | 35.4 |
|                               | TC:TN (molar)                                  | 14.5 $\pm$ 0.2  | 11.9 - 18.2 | 9.3            | 20.7 $\pm$ 0.3   | 17.4 - 24.6 | 8.6  |
|                               | TN:TP (molar)                                  | 46.0 $\pm$ 2.3  | 27.1 - 74.9 | 29.5           | 44.9 $\pm$ 2.8   | 20.4 - 69.2 | 36.3 |
| Calcium (g kg <sup>-1</sup> ) | 80.4 $\pm$ 8.2                                 | 24.5 - 236      | 59.4        | 286 $\pm$ 4.9  | 225 - 329        | 10.2        |      |
| Soil                          | LOI (%)                                        | 81.2 $\pm$ 1.4  | 48.6 - 91.0 | 12.0           | 54.2 $\pm$ 3.4   | 16.5 - 85.3 | 44.4 |
|                               | Total Phosphorus (mg kg <sup>-1</sup> )        | 826 $\pm$ 48.7  | 318 - 1449  | 42.1           | 509 $\pm$ 25.6   | 312 - 947   | 35.9 |
|                               | Total Nitrogen (g kg <sup>-1</sup> )           | 29.9 $\pm$ 0.5  | 19.9 - 36.2 | 11.7           | 20.2 $\pm$ 1.1   | 7.7 - 31.8  | 39.4 |
|                               | Total Carbon (g kg <sup>-1</sup> )             | 445 $\pm$ 7.1   | 290 - 504   | 11.4           | 350 $\pm$ 16.4   | 171 - 495   | 33.4 |
|                               | TC:TP (molar)                                  | 1777 $\pm$ 141  | 671 - 3917  | 56.8           | 2069 $\pm$ 145   | 534 - 4091  | 50.0 |
|                               | TC:TN (molar)                                  | 17.4 $\pm$ 0.2  | 13.6 - 21.1 | 7.8            | 20.9 $\pm$ 0.3   | 17.9 - 25.8 | 9.5  |
|                               | TN:TP (molar)                                  | 100 $\pm$ 7.5   | 39.5 - 217  | 53.2           | 103 $\pm$ 8.0    | 22.3 - 225  | 55.1 |
| Calcium (g kg <sup>-1</sup> ) | 63.2 $\pm$ 5.2                                 | 26.0 - 179      | 59.0        | 161 $\pm$ 13.0 | 39.2 - 313       | 57.9        |      |
| Vegetation                    | Total Phosphorus (mg kg <sup>-1</sup> )        | 989 $\pm$ 76    | 87.2 - 4694 | 83.1           | 1435 $\pm$ 182   | 210 - 3378  | 72.7 |
|                               | Total Nitrogen (g kg <sup>-1</sup> )           | 431 $\pm$ 1.7   | 329 - 464   | 4.3            | 272 $\pm$ 8.5    | 186 - 360   | 18.1 |
|                               | Total Carbon (g kg <sup>-1</sup> )             | 8.9 $\pm$ 0.3   | 4.0 - 24.6  | 36.7           | 22.5 $\pm$ 1.9   | 9.4 - 48.7  | 49.2 |
|                               | TC:TP (molar)                                  | 2457 $\pm$ 243  | 205 - 13013 | 107            | 845 $\pm$ 116    | 237 - 2487  | 79.1 |
|                               | TC:TN (molar)                                  | 63.0 $\pm$ 1.9  | 19.3 - 117  | 31.9           | 16.1 $\pm$ 0.8   | 7.5 - 23.7  | 30.1 |
|                               | TN:TP (molar)                                  | 33.7 $\pm$ 2.3  | 3.9 - 126   | 74.0           | 48.1 $\pm$ 4.8   | 12.3 - 120  | 57.4 |

Table 3. Siegel repeated median's linear model results for stoichiometric relationships within each ecosystem compartment along flow-way (FW) 1 and 3 within Stormwater Treatment Area-2. Bold  $\rho$ -values indicate models where slope was not significantly different than one.

| Y   | X  | Compartment   | Flow Path | N   | Slope | Intercept | V-Value | $\rho$ -value |
|-----|----|---------------|-----------|-----|-------|-----------|---------|---------------|
| DOC | TP | Surface Water | FW 1      | 69  | 0.21  | 2.39      | 990     | <0.01         |
|     |    |               | FW 3      | 265 | -0.03 | 3.53      | 9184    | <0.01         |
| TC  | TP | Floc          | FW 1      | 34  | -0.13 | 7.06      | 205     | <b>0.12</b>   |
|     |    |               | FW 3      | 35  | 0.07  | 4.68      | 427     | <0.05         |
|     |    | Soil          | FW 1      | 51  | -0.05 | 6.49      | 77      | <0.01         |
|     |    |               | FW 3      | 51  | -0.78 | 10.69     | 94      | <0.01         |
|     |    | Vegetation    | FW 1      | 117 | -0.03 | 10.58     | 335     | <0.01         |
|     |    |               | FW 3      | 33  | 0.12  | 9.55      | 543     | <0.01         |
| DOC | TN | Surface Water | FW 1      | 69  | 0.73  | 2.91      | 820     | <0.01         |
|     |    |               | FW 3      | 265 | 0.46  | 3.10      | 28251   | <0.01         |
| TC  | TN | Floc          | FW 1      | 34  | 0.77  | 3.37      | 580     | <0.01         |
|     |    |               | FW 3      | 35  | 0.61  | 3.80      | 630     | <0.01         |
|     |    | Soil          | FW 1      | 51  | 0.37  | 4.87      | 1113    | <0.01         |
|     |    |               | FW 3      | 51  | 0.82  | 3.41      | 1326    | <0.01         |
|     |    | Vegetation    | FW 1      | 117 | -0.06 | 10.89     | 1141    | <0.01         |
|     |    |               | FW 3      | 33  | 0.29  | 7.83      | 554     | <0.01         |
| TN  | TP | Surface Water | FW 1      | 69  | 0.36  | -0.94     | 561     | <0.01         |
|     |    |               | FW 3      | 265 | 0.08  | 0.50      | 25901   | <0.01         |
|     |    | Floc          | FW 1      | 34  | 0.09  | 2.76      | 468     | <0.01         |
|     |    |               | FW 3      | 35  | 0.14  | 1.65      | 490     | <0.01         |
|     |    | Soil          | FW 1      | 51  | 0.01  | 3.36      | 676     | <b>0.71</b>   |
|     |    |               | FW 3      | 51  | -1.01 | 9.24      | 101     | <0.01         |
|     |    | Vegetation    | FW 1      | 117 | 0.27  | 5.55      | 6723    | <0.01         |
|     |    |               | FW 3      | 33  | 0.32  | 6.02      | 561     | <0.01         |

Table 4. Comparison by Kruskal-Wallis rank sum test of stoichiometric ratios between flow-way 1 and 3 for surface water, soil flocculent material (floc) and recently accreted soil ecosystem compartments. Statistically significant comparison identified by italicized  $\rho$ -values.

| Ecosystem<br>Compartment | Ratio  | $\chi^2$ | $\rho$ -value   |
|--------------------------|--------|----------|-----------------|
| Surface Water            | DOC:TP | 10.9     | <i>&lt;0.01</i> |
|                          | DOC:TN | 74.3     | <i>&lt;0.01</i> |
|                          | TN:TP  | 22.1     | <i>&lt;0.01</i> |
| Floc                     | TC:TP  | 7.89     | <i>&lt;0.01</i> |
|                          | TC:TN  | 50.66    | <i>&lt;0.01</i> |
|                          | TN:TP  | 0.0005   | 0.98            |
| Soil                     | TC:TP  | 1.76     | 0.18            |
|                          | TC:TN  | 0.13     | 0.72            |
|                          | TN:TP  | 60.12    | <i>&lt;0.01</i> |

Table 5. Flow way assessment of total phosphorous (TP), total nitrogen (TN) and carbon (dissolved organic carbon [DOC] for surface water and total carbon [TC] for floc, soil and vegetation) along flow-ways 1 and 3 of STA-2. Spearman's rank sum correlation and Thiel-Sen Slope estimate results summarized by flow way and ecosystem compartment.

| Compartment   | Parameter | Flow-way 1        |               |                 | Flow-way 3        |               |                 |
|---------------|-----------|-------------------|---------------|-----------------|-------------------|---------------|-----------------|
|               |           | Spearman's $\rho$ | $\rho$ -value | Thiel-Sen Slope | Spearman's $\rho$ | $\rho$ -value | Thiel-Sen Slope |
| Surface Water | TP        | -1.0              | <0.01         | -113            | -1.0              | <0.01         | -55.0           |
|               | TN        | -1.0              | <0.01         | -1.1            | -0.9              | <0.01         | -0.3            |
|               | DOC       | -1.0              | <0.01         | -14.8           | 0.3               | 0.66          | 0.4             |
|               | DOC:TP    | 0.8               | 0.06          | 198             | 1.0               | <0.01         | 326             |
|               | DOC:TN    | 0.9               | <0.01         | 0.3             | 0.9               | <0.05         | 0.2             |
|               | TN:TP     | 1.0               | <0.05         | 133             | 1.0               | <0.01         | 260             |
| Floc          | TP        | -0.8              | <0.01         | -1531           | -0.5              | 0.09          | -594            |
|               | TN        | -0.1              | 0.67          | -1.7            | 0.6               | 0.07          | 4.5             |
|               | TC        | 0.1               | 0.82          | 50.0            | 0.5               | 0.09          | 42.6            |
|               | TC:TP     | 0.8               | <0.01         | 536             | 0.8               | <0.01         | 799             |
|               | TC:TN     | 0.1               | 0.86          | 0.2             | -0.6              | 0.7           | -2.6            |
|               | TN:TP     | 0.9               | <0.01         | 41.7            | 0.9               | <0.01         | 54.9            |
| Soil          | TP        | -0.8              | <0.01         | -358            | -0.7              | <0.05         | -354            |
|               | TN        | 0.1               | 0.88          | 0.8             | 0.7               | <0.05         | 7.4             |
|               | TC        | -0.1              | 0.69          | -9.8            | 0.8               | <0.01         | 95.7            |
|               | TC:TP     | 0.4               | 0.25          | 225             | 0.6               | <0.05         | 1389            |
|               | TC:TN     | -0.7              | <0.05         | -1.2            | -0.7              | <0.05         | -1.8            |
|               | TN:TP     | 0.4               | 0.18          | 32.9            | 0.6               | 0.06          | 90.9            |
| Vegetation    | TP        | -0.7              | <0.01         | -1231           | -0.7              | <0.01         | -2445           |
|               | TN        | -0.5              | <0.01         | -2.2            | -0.8              | <0.01         | -20.0           |
|               | TC        | 0.6               | <0.01         | 14.5            | -0.8              | 0.16          | -47.2           |
|               | TC:TP     | 0.7               | <0.01         | 1201            | 0.8               | <0.01         | 724             |
|               | TC:TN     | 0.5               | <0.01         | 14.3            | 0.9               | <0.01         | 11.3            |
|               | TN:TP     | 0.7               | <0.01         | 19.0            | 0.6               | <0.01         | 23.4            |
