1 **Title:** Evaluation of nutrient stoichiometric relationships amongst ecosystem compartments of a  
2 subtropical treatment wetland. Do we have “Redfield Wetlands”?  
3

4 Paul Julian II<sup>1</sup>, Stefan Gerber<sup>2</sup>, Rupesh K Bhomia<sup>2</sup>, Jill King<sup>3</sup>, Todd Z. Osborne<sup>2,4</sup>, Alan L.  
5 Wright<sup>1</sup>, Matthew Powers<sup>3</sup>, Jacob Dombrowski<sup>3</sup>

6 <sup>1</sup> University of Florida, Soil and Water Sciences Department, Ft. Pierce, FL 34945

7 \*Corresponding Author: [pjulian@ufl.edu](mailto:pjulian@ufl.edu); ORCID: 0000-0002-7617-1354

8 <sup>2</sup> University of Florida, Soil and Water Sciences Department, Gainesville, FL, 32611

9 <sup>3</sup> South Florida Water Management District, Water Quality Treatment Technologies, West Palm  
10 Beach, FL, 33406

11 <sup>4</sup> University of Florida, Whitney Laboratory for Marine Bioscience, St Augustine, FL 32080

## 12 **Abstract (350 words)**

13 **Background:** Evaluation of carbon (C), nitrogen (N) and phosphorus (P) ratios in aquatic and  
14 terrestrial ecosystems can advance our understanding of biological processes, nutrient cycling  
15 and the fate of organic matter (OM) in these ecosystems. Eutrophication of aquatic ecosystems  
16 can change the accumulation and decomposition of OM which can alter biogeochemical cycling  
17 and alter the base of the aquatic food web. This study investigated nutrient stoichiometry within  
18 and among wetland ecosystem compartments (i.e. water column, flocculent, soil and above  
19 ground vegetation biomass) of two sub-tropical treatment wetlands with distinct vegetation  
20 communities. Two flow-ways (FWs) within the network of Everglades Stormwater Treatment  
21 Areas in south Florida (USA) were selected for this study. We evaluated nutrient stoichiometry  
22 of these to understand biogeochemical cycling and controls of nutrient removal in a treatment  
23 wetland within an ecological stoichiometry context.

24 **Results:** This study demonstrates that C, N, and P stoichiometry can be highly variable among  
25 ecosystem compartments and between FWs. Power law slopes of C, N and P within surface  
26 water floc, soil and vegetation were significantly different between and along FWs.

27 **Conclusions:** Assessment of wetland nutrient stoichiometry between and within ecosystem  
28 compartments suggests unconstrained stoichiometry related to P that conforms with the notion of  
29 P limitation in the ecosystem. Differences in N:P ratios between floc and soil suggest different  
30 pathways of organic nutrient accumulation and retention between FWs. Surface nutrient  
31 stoichiometry was highly variable and decoupled (or closed to decoupled, by our criteria), in  
32 particular with respect to P. We hypothesize that decoupling may be the imprint of variability in  
33 inflow nutrient stoichiometry. However, despite active biogeochemical cycles that could act to  
34 restore nutrient stoichiometry along the FW, there was little evidence that such balancing  
35 occurred, as the degree of stoichiometric decoupling in the water column did change with  
36 distance downstream. This information is only the beginning of a larger journey to understand  
37 stoichiometric processes within wetland ecosystems and how it related to ecosystem function.

38 **Keywords:** decomposition, mineralization, Everglades, treatment wetlands  
39  
40

## 41 **Introduction**

42 The study of nutrient stoichiometry, pioneered by Redfield (1934, 1958), laid the foundation of  
43 two important biogeochemical principles that later became basic tenets of ecological  
44 stoichiometry: (1) organisms have consistent carbon (C), nitrogen (N) and phosphorus (P) molar  
45 ratios and (2) the abundance of C, N and P in a system is regulated by interactions between  
46 organisms and their environment. These principles were supported by the similarity of measured  
47 N and P concentrations in marine plankton relative to the ratio of mineral forms of N (as nitrate  
48 [NO<sub>3</sub>]), P (as phosphate [PO<sub>4</sub>]) and non-calcite inorganic C in deep ocean water (Redfield 1934,  
49 1958). The stoichiometric values of the Redfield ratio describe the average composition of  
50 marine organic matter (OM) and the requirements for remineralization of OM. Since its  
51 acceptance, the Redfield ratio has been debated and revisited frequently in light of new analytical  
52 methods, more data, and clarification of the frequent misrepresentations of the notable Redfield  
53 ratio (Lenton and Watson 2000; Geider and La Roche 2002). Despite this ongoing re-evaluation  
54 of the Redfield ratio most studies generally do not reject these conclusions but rather add  
55 subtlety and nuance (Sternner et al. 2008). Furthermore, the Redfield concept has been extended  
56 beyond marine ecosystems into freshwater and terrestrial ecosystems (i.e. lakes, streams,  
57 wetlands, forests, deserts, etc.) where C and nutrient concentrations are generally not part of a  
58 homogenous reservoir, are more variable between ecosystem compartments, residence times of  
59 nutrients in the system are shorter and biogeochemical dynamics differ significantly (Dodds et al.  
60 2002; Dodds 2003; Cleveland and Liptzin 2007; Xu et al. 2013).

61 Prior studies have suggested that C:N:P ratios in soil are tightly constrained (i.e. abundance of  
62 nutrients is highly correlated) suggesting that for any given P concentration there is a comparable  
63 C or N concentration providing a Redfield-like stoichiometric ratio in both bulk soil and soil

64 microbial biomass across forested, grassland and natural wetland ecosystems (Cleveland and  
65 Liptzin 2007; Xu et al. 2013). Redfield (1958) observed both the concentrations and ratio of  
66 elements in ocean water were constrained, indicating that, despite large variability in nutrient  
67 concentrations, the ratios remain unchanged in a specific ecosystem reservoir or compartment  
68 (i.e. water column, phytoplankton, sediment, etc.). Constrained stoichiometry suggests close  
69 interactions and feedbacks between organisms and their environment resulting in proportional  
70 scaling of nutrients (Fig 1). The relative ratios can change with abundance, suggesting a  
71 decoupling of nutrient cycles with increased nutrient availability. Here, we use coupling in a  
72 sense that there is an unbalanced stoichiometric budget expressed as disproportionate scaling  
73 between nutrients within a given ecosystem compartment, that may be allometric but predictable  
74 based on overall amount (high  $R^2$ ) or unpredictable (low  $R^2$ ). Shifts in nutrient concentrations  
75 within a given compartment can be driven by changes in nutrient loading, uptake and transport  
76 mechanisms or internal processes which in-turn can significantly alter stoichiometric  
77 composition of other ecosystem compartments resulting in an unbalanced stoichiometry cascade  
78 (Elser et al. 2009; Collins et al. 2017). Anthropogenically mediated nutrient loading to otherwise  
79 pristine aquatic ecosystems has potential to disrupt the ecological balance of nutrient supply and  
80 demand for both autotrophs and heterotrophs and can substantially affect nutrient (i.e. N and P)  
81 regeneration by disrupting productivity and nutrient remineralization. Long-term nutrient  
82 enrichment in aquatic ecosystems can affect overall nutrient abundance in all ecosystem  
83 compartments, affect rates of recycling between primary producers and OM decomposition,  
84 altering supply and demand for nutrients in different ecosystem compartments (plants, soil OM,  
85 microbial biomass) (Davis 1991; Reddy et al. 1999; Wright and Reddy 2001a). Therefore,  
86 excessive external inputs of nutrients to an ecosystem can potentially lead to a change of the

87 stoichiometric balance of ecosystem compartments by preferential assimilation, changes in  
88 turnover and mineralization rates (Reddy and DeLaune 2008).

89 Treatment wetlands reflect an extreme end-member of such a disruption with long-term nutrient  
90 enrichment (Kadlec and Wallace 2009; Walker and Kadlec 2011). In an effort to restore the  
91 biological integrity of the Everglades ecosystem, the State of Florida and the US Federal  
92 government-initiated restoration and control efforts focusing on water quality improvement. One  
93 such effort is the construction and operation of constructed treatment wetlands to improve the  
94 quality of agricultural runoff water originating in the Everglades Agricultural Area (EAA) prior  
95 to entering the downstream Everglades ecosystem (Chen et al. 2015). These treatment wetlands,  
96 referred to as the Everglades stormwater treatment areas (STAs) were constructed with the  
97 primary objective of removing excess P from surface water prior to discharge to the Everglades  
98 Protection Area. The STAs are composed of several treatment cells or flow-ways (FWs) which  
99 use natural wetland communities to facilitate the removal of P from the water column by  
100 leveraging natural wetland processes including nutrient storage into vegetative tissues and burial  
101 within soils (Kadlec and Wallace 2009). The STAs are highly-managed treatment wetlands  
102 optimized to remove P by managing vegetation and regulating inflow and outflow volumes to  
103 optimize hydrologic residence times, hydraulic loading rates (HLR) and P loading rates (PLR)  
104 (Howard-Williams 1985; Kadlec and Wallace 2009).

105 In the Everglades STAs, water column P concentrations decline along the flow-way establishing  
106 a strong inflow-to-outflow nutrient gradient pointing to notable P sequestration (Juston and  
107 DeBusk 2011; Corstanje et al. 2016). This water column P gradient facilitated by long-term P  
108 loading has promoted the formation of a soil nutrient gradient spatially distributed from inflow-  
109 to-outflow (Zamorano et al. 2018). The strong P-gradient in surface water and soil

110 compartments, suggest that other biologically relevant elements (C and N) may reflect this  
111 gradient to some degree (UF-WBL 2017). Gradients of C and N are apparent but vary in the  
112 degree of change along the FWs (UF-WBL 2017). Moreover, these treatment wetland  
113 ecosystems are typically heterogenous and exhibit significant differences in nutrient  
114 concentrations between ecosystems compartments (such as vegetation, floc and soils) as  
115 influenced by various wetland features and processes (Newman et al. 2004; Osborne et al.  
116 2011b; Bhomia and Reddy 2018; Zamorano et al. 2018).

117 There is considerable variability in loading and storage depending on the location within a FW.  
118 Because other macro-elements (C and N) reflect to some degree changes in P may be possible to  
119 discern a Redfield-like ratio within STA FWs. What is not known is if this Redfield-like ratio is  
120 consistent among systems with different vegetation communities and along the FW with  
121 decreased nutrient concentration in the water column from inflow to outflow. Therefore, this  
122 study focuses on the evaluation of nutrient stoichiometric relationships within wetland ecosystem  
123 compartments along strong nutrient gradients and explore similarities or differences as a result of  
124 different vegetation. Our objective is to evaluate overall nutrient relationships (i.e. C x N, C x P  
125 and N x P) within surface water, soil flocculent material (floc), recently accreted soil (soil) and  
126 vegetation live aboveground biomass (AGB) between two FWs, one dominated by emergent  
127 aquatic vegetation (EAV) and the other by submerged aquatic vegetation (SAV). Using standard  
128 major axis (SMA) regression, it was tested as to whether nutrient concentrations scale allometric  
129 (independently) or isometric (dependently). The isometric model suggests a Redfield-like  
130 nutrient relationship that is strongly governed by a fixed biotic elemental ratio while allometric  
131 relationships imply shifts in nutrient ratios as concentrations (or amounts) of one nutrient  
132 changes. Differences in scaling relationships can indicate changes or differences in

133 biogeochemical drivers and processes as suggested by Brown et al. (2002). We explored, how  
134 these relationships change along the FW of the treatment wetland (reflecting changes in nutrient  
135 supply) and between FWs (reflecting differences in vegetation). We first hypothesize that  
136 nutrient stoichiometric ratios in individual ecosystem compartments will differ between FWs  
137 with different vegetation types. Our second hypothesis is that the compartment's stoichiometry  
138 do not follow the Redfield relationship (i.e. are *unconstrained*) but instead scale allometrically  
139 because of a large gradient in nutrient supply, and that the ratios change predictably and remain  
140 *coupled* (regression on SMA explains > 25 % of variability) within a FW because of the  
141 homogenous vegetation (i.e. the system's macronutrients remain coupled). We further  
142 hypothesize that stoichiometric relationships will change along the flowway from inflow to  
143 outflow due to decreasing nutrient loading.

144

## 145 **Methods**

### 146 *Study Area*

147 A total of six STAs with an approximate area of 231 km<sup>2</sup> are located south of Lake Okeechobee  
148 in the southern portion of the EAA (Fig 2). Prior land uses within the current STA boundaries  
149 include natural wetlands and agricultural land use dominated by sugarcane. The primary source  
150 of inflow water to the STAs is agricultural runoff originating from approximately 284 km<sup>2</sup> of  
151 agricultural land use upstream. Everglades STA treatment cells are comprised of a mixture of  
152 EAV and SAV communities in several configurations including EAV and SAV treatment cells  
153 arranged in parallel or in series (Chen et al. 2015).

154 Stormwater Treatment Area-2 has been in operation since June 1999 with an effective treatment  
155 area of approximately 63 km<sup>2</sup> divided into eight treatment cells. This study was conducted in two  
156 cells, FWs 1 and 3, respectively. The vegetation community of FW 1 is comprised predominately  
157 of EAV including *Typha domingensis* Pers. (cattail) and *Cladium jamaicense* Crantz (sawgrass)  
158 while FW 3 mainly consists of SAV including *Chara* spp. (muskgrass), *Potamogeton* spp.  
159 (pondweed) and *Najas guadalupensis* Spreng (southern naiad), periphyton communities typically  
160 in the lower two-thirds of the FW. Approximately a third of the FW is occupied by EAV species  
161 (Dombrowski et al. 2018). Furthermore, prior to STA-2 construction, FW 1 was a historic natural  
162 wetland while approximately two-thirds of FW 3 was previously farmed and is now managed as  
163 a SAV system (Juston and DeBusk 2006).

164

#### 165 *Data Source*

166 Data used in this study were collected by South Florida Water Management District and  
167 University of Florida and was a part of a larger project within the overall South Florida Water  
168 Management District's (SFWMD) Restoration Strategies Science Plan to improve the  
169 understanding of mechanisms and factors that affect P treatment performance (SFWMD 2012).  
170 Data from one study of the Science Plan to evaluate P-sources, form, fluxes and transformation  
171 process in the STAs was used for this study and can be found in UF-WBL (2017). Water quality  
172 monitoring locations were established along two FWs within STA-2 along a transect running  
173 from inflow to outflow of the FW (Fig 2). Weekly surface water grab samples were collected at  
174 monitoring locations within FWs 1 and 3 to characterize changes in nutrient concentrations and  
175 availability during prescribed/semi-managed flow event. Flow events were planned as a short  
176 duration (fixed temporal window) during which hydraulic flows to the system were maintained  
177 within a pre-determined range, and extensive monitoring was undertaken to ascertain system's

178 response to the controlled flow regime. These prescribed flow events were scheduled and cycled  
179 through various flow/no-flow sequences for FWs 1 and 3.

180 Surface water grab samples were collected at a depth of 10-15 centimeters just under the water  
181 surface, approximately mid-water depth whenever feasible. Water column parameters such as  
182 total P (TP), total N (TN), and dissolved organic C (DOC) were analyzed for these samples. In  
183 the Everglades system, the organic C pool is predominately composed of the DOC fraction with  
184 low particulate OC concentrations (Julian et al. 2017), therefore the bias of not including  
185 particulates in the C analysis is small. Soil samples were collected along the flow transects twice  
186 during the dry and wet seasons between 2015 and 2016 using the push-core method consistent  
187 with prior wetland soil studies (Bruland et al. 2007; Osborne et al. 2011a; Newman et al. 2017).  
188 Samples were extruded from the soil core tube and partitioned into floc and soil. Floc was  
189 characterized as the suspended unconsolidated material on top of the consolidated soil. It was  
190 poured into a secondary sampling container, allowed to settle for 4 hours supernatant water was  
191 removed via aspiration and remaining floc material was collected and analyzed. The  
192 consolidated soil underneath the floc layer was segmented with the 0 - 5 cm interval retained for  
193 analyses. Floc and soil samples were analyzed for percent ash, TP, TN, and TC. Loss-on-ignition  
194 (LOI) was calculated using percent ash values subtracted by 100 percent. Live AGB were  
195 collected from dominant vegetation in FW 1 and FW 3 at the end of the 2015 (November 2015)  
196 and 2016 (September 2016) wet seasons. Additional details regarding floc and soil sampling is  
197 discussed by UF-WBL (2017). Vegetation sampling locations were located at inflow, mid and  
198 outflow regions of the FWs within close proximity to the surface water and soil monitoring  
199 locations (Fig 2). Vegetation samples were collected from four to eight randomly placed 0.25 m<sup>2</sup>  
200 quadrats adjacent to the identified sampling locations. Dry homogenized vegetation samples



201 were analyzed for TP, TN and TC content consistent with U.S. Environmental Protection  
202 Agency approved methods (Table S1). Surface water inflow volume and TP concentrations were  
203 retrieved from the South Florida Water Management District (SFWMD) online database  
204 (DBHYDRO; [www.sfwmd.gov/dbhydro](http://www.sfwmd.gov/dbhydro)) for each FW between May 1<sup>st</sup> 2014 and April 30<sup>th</sup>  
205 2018 to include periods prior to sampling for this study. For purposes of this data analysis and  
206 summary statistics, data reported as less than method detection limit (MDL; Table S1) were  
207 assigned a value of one-half the MDL, unless otherwise noted.

208

### 209 *Data Analysis*

210 Hydraulic and P loading rates (HLR and PLR, respectively) were calculated based on methods  
211 by Kadlec and Wallace (2009). Weekly surface water grab TP samples were collected at inflow  
212 and outflow structures and used to estimate inflow and outflow P-load amounts. Phosphorus  
213 loading rates were estimated using the daily TP load divided by FW area. Hydraulic loading rates  
214 were estimated by dividing flow volume by FW area. Surface water nutrient concentrations were  
215 converted from mass of nutrient per volume concentration (i.e. mg L<sup>-1</sup>) to molar concentrations  
216 (i.e. mM). Soil and floc concentrations were converted from mass of nutrient per mass of soil  
217 (i.e. g kg<sup>-1</sup>) to per area (moles m<sup>-2</sup>) by multiplying the nutrient concentration (g kg<sup>-1</sup>) with bulk  
218 density (kg m<sup>-3</sup>) and depth (m), and dividing by the nutrient (i.e. C, N and P) atomic weight.:

$$Conc (moles m^{-2}) = \frac{[Nutrient] \times Bulk Density \times Depth}{Nutrient Atomic Weight}$$

219 Nutrient concentrations in AGB was converted from mass per nutrient to mass of tissue to moles  
220 per area by multiplying nutrient concentration by biomass (g m<sup>-2</sup>) then dividing by the nutrient's  
221 molecular weight. Expressing nutrient concentrations in moles per area units normalizes the

222 concentration based upon bulk density for floc and soil and biomass in the case of AGB. In  
223 aquatic systems or in mineral soils Redfield ratios as well as evolution of isometric vs. allometric  
224 relationships have typically been carried out based on concentration (moles  $\text{kg}^{-1}$  or moles  $\text{L}^{-1}$ ).  
225 However, concentration-based analysis in the C-rich vegetation, floc and soil could be  
226 misleading, since any C increment would also increase the mass (the numerator for the  
227 concentration-based analysis; Fig S1). Hence, we chose to perform SMA analysis on a per area  
228 basis for these compartments.

229 Nutrient stoichiometric relationships within each ecosystem compartment (i.e. surface water,  
230 soil, floc and vegetation) were examined by evaluating power law slopes using standardized  
231 major axis (SMA) regression ('smatr' package; Warton et al. 2006) consistent with Cleveland  
232 and Liptzin (2007). Unlike standard regression techniques which are used to predict one variable  
233 from another, SMA regression assesses the best fit line between two variables. Molar nutrient  
234 concentrations (water column) or amounts ( $\text{mol m}^{-2}$ ) were log-transformed and slope of the SMA  
235 regression was evaluated against the null hypothesis that the slope was not different from one  
236 ( $\beta \neq 1$ ). Power law ( $y = kx^\beta$ ) and its linearized form ( $\log(y) = \beta \log(x) + \log(k)$ ) are used  
237 to evaluate the degree of proportional scaling between two variables. Scaling relationships and  
238 power-law distributions are key to understanding fundamental ecological relationships and  
239 processes in the natural system such as energy acquisition and transformation, biomass-growth  
240 relationships and evaluation of watershed chemostasis (Brown et al. 2002; Marquet et al. 2005;  
241 Wymore et al. 2017). In this analysis, we tested if the slope of the SMA regression results were  
242 statistically significantly different from one (i.e.  $\rho < 0.05$ ) and interpreted as the variables are  
243 independent and do not proportionally scale (i.e. allometric growth) where one nutrient can  
244 either be enriched or depleted relative to the other (Fig 1). If the slope was not statistically

245 different from one (i.e.  $\rho > 0.05$ ), then the variables exhibited proportional changes (i.e. isometric  
246 growth; Fig 1) resulting in a constrained stoichiometry between nutrients. A slope not different  
247 from one would indicate that for any given concentration of nutrient X (i.e. C, N, or P) a  
248 proportional concentration of nutrient Y (i.e. P, C or N) existed. The degree of scaling (i.e. slope  
249 test) was combined with an evaluation of the regression coefficient of determination ( $R^2$ ) which  
250 indicated the degree of predictability (i.e. one nutrient can be used to predict the other). Low  $R^2$   
251 values reflected high stoichiometric variability suggesting a decoupling of nutrients while high  
252  $R^2$  values reflected low stoichiometric variability indicating a degree of coupling between  
253 nutrients. For our purposes, decoupled stoichiometric relationships were defined as a relationship  
254 with an  $R^2$  less than 0.25,  $R^2$  greater than 0.25 suggested some degree of coupling.

255 Standardized major axis SMA regression was applied to surface water, floc and soil nutrient  
256 concentrations or amounts separately between FWs to evaluate the overall (entire FW)  
257 stoichiometric relationship of C (DOC in surface water, TC in floc, soil and vegetation) to P, C  
258 to N and N to P using the 'sma' function in the smatr R-library (Warton et al. 2012). To compare  
259 nutrient stoichiometric relationships along each FW, monitoring locations were spatially  
260 aggregated to represent the inflow region (<0.3 fractional distance between inflow and outflow),  
261 mid region (0.3 – 0.6 fractional distance) and outflow region (>0.6 fractional distance) with FW  
262 region being evaluated using SMA regression. The resulting models from this location analysis  
263 were referred to as local models. Slope values from each FW (overall) and FW region (local)  
264 were compared to evaluate if each region shared a similar slope using a maximum likelihood  
265 comparison of slopes consistent with Warton and Weber (2002) using the 'slope.com' function  
266 in the smatr R-library. Additionally, slope values of overall stoichiometric comparisons were  
267 also evaluated between FWs. Ecosystem compartment nutrient concentrations and amounts as

268 well as molar ratios were compared between FWs by Kruskal-Wallis rank sum test. To  
269 characterize the relationship between floc and soil along the two-flow path transects, regional  
270 categories outlined above (i.e. inflow, mid and outflow) were considered with soil and floc  
271 TN:TP being compared between FWs and distance downstream categories by Kruskal-Wallis  
272 rank sum test and a post-hoc Dunn's test of multiple comparisons ('dunn.test' in the dunn.test R-  
273 library) for each FW, separately. Floc and soil TN:TP were also compared by Spearman's rank  
274 sum correlation by flow path separately. All statistical operations were performed with R© (Ver  
275 3.1.2, R Foundation for Statistical Computing, Vienna Austria), unless otherwise stated all  
276 statistical operations were performed using the base R library. The critical level of significance  
277 was set at  $\alpha = 0.05$ . Unless otherwise stated, mean values were reported with together with  
278 standard errors (i.e. mean  $\pm$  standard error).

## 279 **Results**

280 A total of six prescribed/managed flow events occurred between August 10<sup>th</sup>, 2015 and July 31<sup>st</sup>,  
281 2017 with events ranging from 35 to 63 days in FWs 1 and 3 within STA-2, during which water  
282 column data were collected. During the flow events, daily HLR ranged between 0 (no inflow)  
283 and 31.5 cm d<sup>-1</sup> with FW 3 receiving a relatively higher mean HLR of  $3.4 \pm 0.3$  cm d<sup>-1</sup> (Mean  $\pm$   
284 SE), compared to  $2.2 \pm 0.4$  cm d<sup>-1</sup> in FW 1. Observed daily PLR values ranged from 0 (no  
285 loading) to 90.9 mg m<sup>-2</sup> d<sup>-1</sup> with FW 1 receiving a higher relative load a mean PLR of  $3.4 \pm 0.7$   
286 mg m<sup>-2</sup> d<sup>-1</sup>. Meanwhile, FW 3 experienced a mean PLR of  $2.1 \pm 0.2$  mg m<sup>-2</sup> d<sup>-1</sup> (complete  
287 summary of flow event characteristics can be found in the Supplemental Material; Table S2 and  
288 Fig S2). The daily HLR and PLR observed during this study was consistent with historic  
289 operational loading rates experienced by these FWs (Chen et al. 2015). Furthermore, this  
290 synoptic comparison is also consistent with the recent period of record (last four water years)

291 where HLR and PLR were generally greater in FW 3 than FW 1 (Fig S3). Mean HLR values  
292 observed during the study occurred at 56% and 71%, respectively for FW 1 and FW 3 along the  
293 HLR cumulative distribution function curve (CDF; Fig S3). Meanwhile, mean PLR values  
294 observed during the study occurred at 71% for both FW 1 and FW 3 along their respective PLR  
295 cumulative duration curve despite FW 1 having a higher maximum PLR and steeper CDF curve  
296 (Fig S3).

#### 297 *Water Column C:N:P*

298 Dissolved organic carbon, TN and TP concentrations were significantly different between FWs.  
299 Flow-way mean DOC concentrations ( $\chi^2 = 66.2$ ;  $df=1$ ;  $p<0.01$ ; Table 1) and TN concentrations  
300 ( $\chi^2 = 121.9$ ;  $df=1$ ;  $p<0.01$ ; Table 1) were significantly greater for FW 3 than FW 1. Meanwhile,  
301 FW mean TP concentrations were significantly greater for FW 1 than FW 3 ( $\chi^2 = 15.5$ ;  
302  $df=1$ ;  $p<0.01$ ; Table 1). These differences are surprising given that each FW receives identical  
303 sources of water and presumably due to different loading regimes (HLR and PLR; Table S1) and  
304 contain different dominant vegetative communities resulting in differences in overall  
305 biogeochemical cycling. Across FWs, surface water DOC:TP values range from 216 to 14,613  
306 (on a molar basis) with FW 3 having significantly greater values ( $\chi^2 = 38.6$ ,  $df=1$ ,  $p<0.01$ ; Table  
307 1). Meanwhile, surface water DOC:TN values range from 9.3 to 24.0 with FW 1 having  
308 significantly greater mean DOC:TN values ( $\chi^2 = 88.3$ ,  $df=1$ ,  $p<0.01$ ; Table 1). Stoichiometric  
309 ratios of TN:TP ranged from 15.5 to 788.7 across the FWs with FW 3 having significantly  
310 greater TN:TP values than FW1 ( $\chi^2 = 58.7$ ,  $df=1$ ,  $p<0.01$ ; Table 1).

311 Overall FW surface water stoichiometric scaling relationships between DOC, TP and TN  
312 resulted in statistically significant relationships with slopes significantly different from one

313 (Table 2) indicating that nutrient pools scaled independently (allometrically) in the surface water  
314 ecosystem compartment. Moreover, the  $R^2$  varies between models and FWs with the comparison  
315 of DOC to TP in FW 3 having a low  $R^2$  value (0.01) suggesting that the DOC to TP relationship  
316 was highly variable (use decoupled or unpredictable) for this flow-way. Overall FW model  
317 slopes were significantly different between FWs for comparisons of DOC to TP (Likelihood  
318 Ratio (LR) Statistics = 6.1,  $df=1$ ,  $p<0.05$ ), DOC to TN (LR Statistics = 5.0,  $df=1$ ,  $p<0.05$ ), and  
319 TN to TP (LR Statistics = 16.9,  $df=1$ ,  $p<0.01$ ).

320 Much like the overall FW comparison of stoichiometric relationships, DOC by TP and TN by TP  
321 local (inflow, midflow and outflow) stoichiometric comparisons along the FWs resulted in  
322 models with slopes significantly different from one (Table 2) indicating that nutrient pools scaled  
323 independently (allometrically). With respect to DOC to TN, inflow and mid regions of FW 1 and  
324 the mid region of FW 3 resulted in models with slopes that were not significantly different from  
325 one demonstrating isometric scaling of nutrient pools (Table 2 and Fig 3). The remaining DOC  
326 by TN models had slopes significantly different from one and all models had relatively high  $R^2$   
327 values along the inflow to outflow gradient, however it appears that  $R^2$  values were relatively  
328 lower at the inflow region of FW 1 and inflow and mid regions of FW 3 (Table 2). The  $R^2$  values  
329 of the TN by TP models remained relatively constant in FW 1 but declined along FW 3  
330 indicating increased variability in the stoichiometric relationship of TN to TP in the SAV  
331 dominated FW. Stoichiometric relationships between DOC, TN and TP varied along both FWs  
332 (Fig 3). Slopes along FW 1 and FW 3 were significantly different for DOC to TP (LR  
333 Statistic=145.9,  $df=2$ ,  $p<0.01$  and LR Statistic=385.6,  $df=2$ ,  $p<0.01$ , respectively). Slopes along  
334 FW 1 and FW 3 did not significantly differ for TN to TP (LR Statistic=3.3,  $df=2$ ,  $p=0.19$ , LR  
335 Statistic =4.6,  $df=2$ ,  $p=0.10$ , respectively) and DOC to TN slopes did not differ for DOC to TN

336 (LR Statistic=3.8, df=2,  $\rho=0.15$ ) along FW 1 indicating common slopes within each region of the  
337 FW. Meanwhile, slopes along FW 3 significantly differed for DOC to TN (LR Statistic=31.9,  
338 df=2,  $\rho<0.01$ ).

339

#### 340 *Flocculent C:N:P*

341 Floc in FW 3 had a greater mean bulk density and lower mean LOI than floc in FW 1, indicating  
342 that material in FW 1 is contains more organic material than FW 3 (Table 1). Much like the  
343 water column significant differences in floc nutrient content differed between FWs with FW 3  
344 having significantly greater TP ( $\chi^2 = 18.9$ ; df=1; $\rho<0.01$ ), TN ( $\chi^2 = 30.6$ ; df=1; $\rho<0.01$ ) and TC ( $\chi^2$   
345 = 44.5; df=1; $\rho<0.01$ ; Table 1) on an area basis (i.e. mol m<sup>-2</sup>). Across FWs, floc TC:TP values  
346 ranged from 411 to 1,369. Notable differences in stoichiometric ratios between FWs were  
347 apparent with C:P and C:N ratios being significantly different between FWs. Flow-way mean  
348 TC:TP and TC:TN values were significantly larger for FW 3 ( $\chi^2= 7.2$ , df=1, $\rho<0.01$ ,  $\chi^2= 46.7$ ,  
349 df=1, $\rho<0.01$  respectively; Table 1). Meanwhile, floc TN:TP values did not significantly differ  
350 between FWs ( $\chi^2= 0.0006$ , df=1, $\rho=0.94$ ; Table 1). Comparisons of overall stoichiometric scaling  
351 between TC, TN and TP in the floc compartment resulted in slopes significantly different from  
352 one (allometric scaling) except for TC to TN comparisons in FW 3 with a reported slope of 0.99  
353 indicating near isometry between TC to TN (Fig 4 and Table 3). The overall FW models for TC  
354 to TP and TN to TP, respectively, resulted in moderate R<sup>2</sup> values for both FWs while TC to TN  
355 R<sup>2</sup> values were much higher. Slopes of the overall FW models for TC to TP, TC to TN and TN to  
356 TP were not significantly different between FWs (LR Statistic = 0.08, df =1,  $\rho=0.77$ , LR Statistic  
357 = 1.35, df =1,  $\rho=0.25$  and LR Statistic = 0.02, df =1,  $\rho=0.88$ , respectively).

358 At a FW local scale (in-, mid, and outflow) in FW 1, TC to TP slopes at inflow and mid regions  
359 were not significantly different from one while outflow TC to TP was significantly different  
360 from one with a reported slope of 0.78 indicating potential depletion of C relative to P. Local TC  
361 to TP scaling relationships in FW 1 were highly variable with moderate  $R^2$  values at the inflow  
362 region and slightly higher  $R^2$  values at the outflow region indicating some stoichiometric  
363 variability despite slopes for inflow and mid regions not significant from one (Table 3). Total C  
364 to TP slope values in FW 3 along the FW (in-, mid and outflow) were not significantly different  
365 from one with some stoichiometric variability especially in the mid region ( $R^2 = 0.70$ ; Table 3).  
366 The TC to TN relationship for FW 1 outflow region was the only relationship with a slope  
367 significantly different from one with all other slopes being less than one indicating depletion of  
368 C relative to N (Table 3). Generally, local TC to TN  $R^2$  values were high except for mid regions  
369 of FW 1 with an  $R^2$  of 0.87 indicating some stoichiometric variability despite being an isometric  
370 relationship (Table 3). All local floc TN to TP slopes were not significantly different from one  
371 with FW 1 outflow region being the exception with a slope of 0.87 suggesting N depletion  
372 relative to P in this region of the FW (Table 3). All slopes along FW 3 with respect to TN to TP  
373 relationships were not significantly different from one (i.e. isometric scaling). A TN to TP slope  
374 of significantly different from one with a value of 0.32 for FW 3 mid region suggests possible  
375 depletion of N relative to P possibly marking a transition within the FW given the differences in  
376 TN to TP and TC to TP (Table 3). Stoichiometric relationships between floc TC, TN and TP  
377 varied along both FWs (Fig 4). Despite some variability in slope values along FW 1 and 3,  
378 slopes between regions were not significantly different for floc TC to TP (LR Statistic=1.41,  
379  $df=2$ ,  $\rho=0.49$  and LR Statistic=3.49,  $df=2$ ,  $\rho=0.17$ , respectively), TC to TN (LR Statistic=4.59,



380 df=2,  $\rho=0.10$  and LR Statistic=1.14, df=2,  $\rho=0.56$ , respectively) or TN to TP (LR  
381 Statistic=0.006, df=2,  $\rho=1.00$  and LR Statistic=5.86, df=2,  $\rho=0.05$ , respectively).

382

### 383 *Soil C:N:P*

384 Similar to the comparisons of flocc nutrients, soil nutrient concentrations significantly differed  
385 between FWs with FW 1 having significantly greater TP ( $\chi^2 = 8.6$ ; df=1;  $\rho<0.01$ ), TN ( $\chi^2 = 17.1$ ;  
386 df=1;  $\rho<0.01$ ) and TC ( $\chi^2 = 26.3$ ; df=1;  $\rho<0.01$ ) concentrations than FW 3 (Table 1). Across  
387 FWs, soil TC:TP values ranged from 534 to 3551 and soil TC:TN ranged from 13.6 to 25.8 with  
388 significant differences for both ratios between FWs ( $\chi^2 = 4.8$ , df=1,  $\rho<0.05$  and  $\chi^2 = 47.4$ ,  
389 df=1,  $\rho<0.01$ , respectively). Both soil TC:TP and TC:TN values were higher for FW 3 than FW 1  
390 (Table 1). Meanwhile, soil TN:TP values ranged from 22.3 to 179.4 with no significant  
391 difference between FWs ( $\chi^2 = 0.6$ , df=1,  $\rho=0.45$ ).

392 Comparisons of overall stoichiometric scaling relationships between TC, TN and TP in the soil  
393 ecosystem compartment resulted in slope values significantly different from one except for TC to  
394 TN comparisons indicating overall proportional (i.e. isometric) scaling of TC to TN in both FWs  
395 (Fig 5 and Table 3). Overall slope values for TC to TP and TN to TP comparisons in both FWs  
396 were less than one indicating depletion of C relative to P and depletion of N relative to P,  
397 respectively (Table 3). Coefficient of determinations (i.e.  $R^2$ ) for overall comparisons of TC, TN  
398 and TP varied between comparisons and FWs with TC to TN being very strongly coupled in both  
399 FWs while TC to TP and TN to TP are less strongly coupled in FW 3 as indicated by lower  $R^2$   
400 values (Table 3). Overall FW model slopes were significantly different between FWs for  
401 comparisons of soil TC to TP (LR Statistics = 31.5, df=1,  $\rho<0.01$ ) and TN to TP (LR Statistics =

402 31.6,  $df=1$ ,  $\rho<0.01$ ) while TC to TN were not significantly different between FWs (LR Statistics  
403 = 3.65  $df=1$ ,  $\rho=0.16$ ).

404 Local comparisons of soil TC, TN and TP resulted in a variety of scaling relationships both  
405 within and across FWs. Interestingly, within FW 1 TC to TP slopes were significantly different  
406 than one for inflow and mid regions with slope values less than one while outflow was not  
407 significantly different than one. This relationship was reverse in FW 3 where the inflow region  
408 was borderline significant ( $\rho$ -value=0.05) while mid and outflow slope values were significantly  
409 different than one moving from depletion to enrichment of C relative P (Table 3). Total C to TN  
410 relationships isometrically (i.e. proportionally) scaled for each region of FW 1, and the inflow  
411 region of FW 3 as indicated by slope values not significantly different from one (Table 3).  
412 However, TC to TN relationships for FW 3 mid and outflow relationships were significantly  
413 different from one with a slope value greater than one at the mid region suggesting enrichment of  
414 C relative to N and a slope value less than one at the outflow pointing to depletion of C relative  
415 to N (Table 3, Fig 5 and 9). Most of the soil TN to TP relationships were allometric (i.e.  
416 independently scaled) as indicated by slope values significantly different from one except for the  
417 outflow region of FW 1. For FW 1 and FW 3, inflow and mid regions had slopes less than one  
418 indicating the depletion of N relative to P. Meanwhile in the outflow region of FW 3, the TN to  
419 TP slope value greater than one indicated N enrichment relative to P (Table 3, Fig 5 and 9). All  
420 allometric TN to TP relationships had highly variable  $R^2$  values with the lowest values observed  
421 at the mid and outflow regions of FW 3, and none of the  $R^2$  values passed the decoupling  
422 threshold (i.e. 0.25). However, the relatively low  $R^2$  for FW 3 mid region suggested some degree  
423 of decoupling between TN and TP (Table 3). Scaling of variables along FW 1 (as indicated by  
424 slope values) were not significantly different with respect to TC to TP (LR Statistic = 2.4,  $df=2$ ,

425  $\rho=0.30$ ) and TC to TN (LR Statistic = 3.0,  $df=2$ ,  $\rho=0.22$ ) but were significantly different with  
426 respect to TN to TP (LR Statistic = 7.9,  $df=2$ ,  $\rho<0.05$ ). Alternatively, scaling of variables along  
427 FW 3 were significantly different for the comparison of TC to TP (LR Statistic = 18.5,  $df=2$ ,  
428  $\rho<0.01$ ) and TC to TN (LR Statistic = 13.3,  $df=2$ ,  $\rho<0.01$ ), but not significantly different for  
429 scaling of TN to TP (LR Statistic = 3.6,  $df=2$ ,  $\rho=0.16$ ).

430 Further comparisons were made for floc and soil molar ratios as they are part of a decomposition  
431 continuum. Indeed, floc and soil N:P molar ratios were significantly correlated for sites within  
432 FW 3 ( $r_s=0.80$ ,  $\rho<0.01$ ). In FW 1, it appears that soil TN:TP ratio has a maxima of 100 (with one  
433 exception), while there is a maxima in the floc compartment in FW 3, but not in the soil (Fig 6).  
434 Both floc ( $\chi^2 =12.7$ ,  $df=2$ ,  $\rho<0.01$ ) and soil ( $\chi^2 =9.9$ ,  $df=2$ ,  $\rho<0.01$ ) N:P molar ratios were  
435 significantly different along FW 3 with Floc N:P at the mid and outflow regions being  
436 statistically different from the inflow region ( $Z =-2.2$ ,  $\rho<0.05$  and  $Z=-3.6$ ,  $\rho<0.01$ , respectively)  
437 while outflow and mid regions were similar ( $Z =-1.4$ ,  $\rho=0.08$ ). Similarly soil N:P values in FW 3  
438 at the mid and outflow regions were statistically different from the inflow region ( $Z =-7.8$ ,  
439  $\rho<0.05$  and  $Z=-3.1$ ,  $\rho<0.01$ , respectively) while outflow and mid regions were similar ( $Z =-1.6$ ,  
440  $\rho=0.06$ ). FW 1 soil and floc N:P values were positively correlated ( $r_s= 0.64$ ,  $\rho<0.01$ ) and soil and  
441 floc N:P values were significantly different between FW regions ( $\chi^2 =12.0$ ,  $df=2$ ,  $\rho<0.01$  and  $\chi^2$   
442  $=16.1$ ,  $df=2$ ,  $\rho<0.01$ , respectively). Floc N:P values in FW 1 were not significantly different  
443 between inflow and mid regions ( $Z=-1.6$ ,  $\rho=0.06$ ) but inflow ( $Z=-4.0$ ,  $\rho<0.01$ ) and mid ( $Z=-2.1$ ,  
444  $\rho<0.05$ ) regions were significantly different from the outflow. However, soil N:P values were not  
445 significantly different between inflow and mid ( $Z=-1.6$ ,  $\rho=0.054$ ) or mid and outflow ( $Z=-1.6$ ,  
446  $\rho=0.054$ ) but inflow was significantly different from outflow ( $Z=-3.5$ ,  $\rho<0.01$ ).

447 *Vegetation C:N:P*

448 Total P and TC concentrations on a per area basis (i.e. mol m<sup>-2</sup>) in live AGB were significantly  
449 different between FWs ( $\chi^2 = 30.0$ , df = 1,  $\rho < 0.01$  and  $\chi^2 = 40.1$ , df = 1,  $\rho < 0.01$ , respectively)  
450 with FW 1 having higher TP and TC mass per area (Table 1). However, TN did not significantly  
451 differ between FWs ( $\chi^2 = 1.5$ , df = 1,  $\rho = 0.22$ ). Across FWs, live AGB TC:TP values ranged from  
452 237.4 to 3,110 with FW 1 being significantly greater than FW 3 ( $\chi^2 = 4.6$ , df=1,  $\rho < 0.05$ ; Table 1)  
453 due to the C rich EAV tissue. Live AGB TC:TN values ranged from 7.5 to 82.8 with FW 1 being  
454 significantly greater than FW 3 ( $\chi^2 = 51.1$ , df=1,  $\rho < 0.01$ ; Table 1). Meanwhile, live AGB TN:TP  
455 value ranged from 7.4 to 120.4 with FW 3 being significantly greater than FW 1 ( $\chi^2 = 42.2$ ,  
456 df=1,  $\rho < 0.01$ ) (Table 1).

457 Stoichiometric comparison of live AGB nutrient concentrations varied across FWs. In FW 1, TC  
458 to TP and TC to TN comparisons resulted in slope values not significantly different from one  
459 indicating proportional (isometric) scaling of C to N and P in AGB tissue (Table 4). In FW 1, the  
460 TN to TP slope was significantly different from one with a slope less than one suggesting N  
461 depletion relative to P (Table 4). In FW 3, TC to TP and TC to TN comparisons resulted in  
462 slopes significantly different from one with slope values greater than one indicating enrichment  
463 of C relative to P and N in AGB tissue (Table 4). Unlike FW 1, the comparison of TN to TP in  
464 FW 3 resulted in slope not significantly different from one indicating isometric scaling of N and  
465 P in FW 3 AGB tissue (Table 4). Between all comparisons with slope values significantly  
466 different from one, R<sup>2</sup> values were generally high ranging between 0.66 (FW 3; TC to TP) to  
467 0.94 (FW 3; TC to TN Table 4) suggesting a high degree of coupling as expected. Between FWs,  
468 TC to TN slopes did not significantly differ (LR Statistic= 1.5, df =1,  $\rho = 0.22$ ) however it appears  
469 that intercept values significantly differ between SMA models driven by FW 1 having a greater

470 C content (Fig 7). Slope values for TC to TP and TN to TP were significantly different between  
471 FWs (LR Statistic= 5.8, df =1,  $p < 0.05$  and LR Statistic= 5.4, df =1,  $p < 0.05$ , respectively) where  
472 FW 3 had greater slope values for both comparisons (Table 4 and Fig 7).

473

## 474 **Discussion**

475 The foundation of ecological stoichiometric theory is built on the laws of conservation of mass  
476 and constant proportions, which result in a long term balance of energy and elements in the  
477 context of interactions between ecosystem compartments (Helton et al. 2015; Van de Waal et al.  
478 2018). This framework suggests a tight linkage between demand, use and recycling of nutrients  
479 which is ultimately the undercurrent of the Redfield ratio where nutrients are tightly constrained  
480 and driven by the interaction between the ambient environment and biota (Redfield 1958; Sterner  
481 and Elser 2002). Redfield (1958) observed that the abundance and ratio of elements in oceanic  
482 systems are constrained leading to the conclusion that a close interaction between organisms and  
483 internal biogeochemical processes regulate the similarities between the environment and the  
484 organisms manifesting in the characteristic “Redfield ratio”.

485 The predictive power of the Redfield ratio has prompted ecologists to search for similar patterns  
486 and relationships for other ecosystems and to find “Redfield-like” ratios to understand the  
487 balance of chemical elements in an ecological context (Sterner and Elser 2002; Cleveland and  
488 Liptzin 2007). In its broadest term, Redfield-like stoichiometry is achieved when biota have  
489 clearly defined (constrained) nutrient ratios. Conceptually this constrained biotic stoichiometry  
490 may imprint itself on the environment, when the flow of nutrients across the system boundaries  
491 (e.g. ocean surface, water/sediment boundary) are small relative to biota internal cycling rates

492 (ingestion and egestion) combined with pathways of preferential losses of excess nutrients  
493 (Lenton and Watson 2000). The development of a Redfield-like ratio in a system is further  
494 hastened when biota can also preferentially acquire elements from external sources (e.g.  
495 biological N fixation). The combined outcome of in versus out (i.e. biogeochemical balancing)  
496 with sufficient time to reach equilibration/steady state ultimately produces a consistent nutrient  
497 stoichiometry (Lenton and Watson 2000; Sterner 2008).

498 While proportional (constrained) stoichiometric relationships between nutrients is the  
499 underpinning concept of the classic Redfield hypothesis as discussed above, relationships  
500 between C, N and P departed from isometric (proportional) relationships within most  
501 compartments (water column, floc, soil, and vegetation) in our study. Exceptions occur at  
502 specific locations within a FW notably between C and N in floc and soil compartments of FW 3  
503 and FW 1, respectively (Table 3, Fig 8 and Fig 9). Much more prevalent was allometric  
504 (independent) scaling with slope values different from one ( $\beta \neq 1$ ). This deviation from an  
505 isometric relationship indicates the relative enrichment or depletion of one element relative to  
506 another resulting in lower or higher stoichiometric ratios (Fig 1). In most cases, the slope  
507 between nutrient concentrations were less than one (Table 2 and 3) indicating that the relative  
508 change of a more abundant element compared to the relative change to a less abundant element is  
509 muted. For example, an increase in P leads to comparatively smaller increases in N and C (Fig 3,  
510 4 and 5).

511 In the water column, even under optimal nutrient use efficiency that is necessary for generating  
512 isometric scaling (Sterner et al. 2008), short residence time combined with large and variable  
513 external nutrient loading (Table S2 and Fig S2) may prevent adjustment to a potential locally  
514 consistent Redfield-like nutrient stoichiometry similar to observations found in tropical streams

515 and lakes (They et al. 2017). The biogeochemical mosaic hypothesis addresses this cross-scale  
516 contrasts in nutrient dynamics recognizing that biogeochemical processes occur under  
517 contrasting conditions and spatially separated therefore occurring at different temporal and  
518 spatial scale thereby influencing (or hampering) the development of Redfield-like relationships  
519 across ecosystem compartments (Sterner et al. 2008). As observed in this study, inflow regions  
520 experience the highest nutrient load to the FWs and as the water moves along the FW total water  
521 column nutrients including inorganic nutrients are reduced to background concentrations, as per  
522 the design and intent of the system (Goforth 2007; Chen et al. 2015; UF-WBL 2017).  
523 Additionally, considerable allochthonous inputs of nutrients act as resource subsidy where they  
524 exert a strong influence on metabolism and material cycling and may be a critical component to  
525 deviations from the characteristic Redfield ratio (Hessen et al. 2003). Moreover, deviations from  
526 any Redfield-like ratio can have large consequences at larger spatial scales possibly to the point  
527 of system stress (Odum et al. 1979; Valett et al. 2008). Given these conditions, allometric  
528 (independent) scaling in the water column is expected and confirmed by our analysis (Table 2,  
529 Fig 3 and Fig 8). Differences in nutrient relationships may further be affected by nutrient  
530 movement (i.e. dispersion, advection, burial, bioturbation, etc.) from one compartment to  
531 another. In this study, nutrient ratios in vegetation, floc, and soil were different which allowed  
532 for stoichiometric mixing between compartments with differences between and along FWs  
533 (Table 3). For example, high net aquatic productivity occurs within the water column in the SAV  
534 dominated FW 3 (UF-WBL 2017), creating conditions for abiotic immobilization and deposition  
535 of nutrients (Juston et al. 2013; Zamorano et al. 2018). In contrast, primary productivity (low net  
536 aquatic productivity; UF-WBL 2017) occurs outside the water column in the EAV system,

537 likely rendering the water column a dominantly heterotrophic system, as opposed to a  
538 predominantly autotrophic system in FW 3.

539 The relative position of the SMA regression lines in the log-log space can infer changes in  
540 potential limitations and how one nutrient relates to another. Dodds and Smith (2016) using a  
541 large regional dataset demonstrated that based on water column TN and TP concentrations, the  
542 range of values predicts N limitation of algal growth in some ecosystems and P limitation in  
543 others based on the relative position of values compared to the N:P Redfield Ratio of 16:1. The  
544 classic N:P Redfield ratio of 16:1 indicates a roughly balanced supply of N and P, while algae  
545 assemblages generally mirror this ratio under balanced growth conditions. In freshwater systems,  
546 a TN:TP molar ratio of 20:1 may be a better indicator of algal nutrient limitation than dissolved  
547 inorganic fractions of N and P (Guildford and Hecky 2000). Regardless of the metric, the  
548 Everglades STAs are strongly P-limited (Walker 1995; Juston and DeBusk 2006; Walker and  
549 Kadlec 2011; Chen et al. 2015) and for this study (Fig 3) where all surface water TN to TP  
550 values were above the P limitation threshold. Moreover, this study suggests that FW 3 is more P-  
551 limiting than FW 1 based on the relative position of the data (SMA regression) to the 20:1 or  
552 16:1 balanced N to P thresholds ( Fig 3). The resulting SMA slope is slightly (but significantly)  
553 higher in FW 1, implying lower use efficiencies for C and N in the SAV dominated FW 3.  
554 However, it is not clear whether these efficiencies are the main driver of shallow SMA slopes,  
555 given the large differences in biotic and abiotic nutrient pathways discussed above.

556 The absence of a Redfield-like relationship (i.e. constrained SMA slopes  $\approx 1$ ) in the flocc and soil  
557 in our dataset differs from previous work that sought to explore relationships in grassland and  
558 forest soils (Cleveland and Liptzin 2007). Prior studies evaluating the nutrient stoichiometric  
559 relationships within the soil compartment compared nutrients on a molar mass per mass of soil



560 ratio (i.e.  $\text{mmol kg}^{-1}$ )(Cleveland and Liptzin 2007; Xu et al. 2013). Cleveland and Liptzin (2007)  
561 evaluated forested and grassland ecosystems which typically have higher relative mineral C that  
562 highly co-varied with other nutrients. This was also largely the case for Xu et al. (2013) but their  
563 study did also include natural wetland ecosystems in the synthesis of stoichiometric  
564 relationships. Evaluation of this wetland specific data compiled by Xu et al. (2013) indicated  
565 very little variation of C relative to other nutrients consistent with Fig S4 and Fig S5 in this  
566 study which evaluated stoichiometry based on concentrations ( $\text{mmol kg}^{-1}$ ). However, in  
567 wetlands, much of the soil mass consists of C. Therefore, an increase in C changes the mass,  
568 which itself is used to calculate concentrations. In other words, at high C concentrations, the  
569 SMA slope approaches zero, if a macronutrient is a substantial part of the overall soil mass. For  
570 this study, soil nutrient concentrations were expressed on a per area basis, instead of the usual  
571 normalization by mass or volume. We demonstrate the effect of concentration per area  
572 (concentration per area,  $\text{mol m}^{-2}$ ) vs. concentration per mass ( $\text{mol kg}^{-1}$ ) in Fig S1.

573 Flocc can be viewed as the beginning of soil OM diagenesis in natural wetland ecosystems, being  
574 a mixture of leaf litter, other organic matter (i.e. bacterial cells, phytoplankton, algae, consumers,  
575 fecal material, etc.) in various states of decay and inorganic particles (clays and silts) (Droppo  
576 2001; Noe et al. 2003; Neto et al. 2006). This matrix of biologic, chemical and even geologic  
577 material is thus expected to be stoichiometrically sandwiched between primary producers (i.e.  
578 vegetation and algae) on the one hand and soil on the other hand. Conceptually, primary  
579 producers exhibit relatively high C to nutrient ratio, which may even widen stoichiometric values  
580 in fresh litter because of plant's re-translocation before tissue abscission (McGroddy et al. 2004).  
581 Active microbial pools immobilize (or retain) nutrients during early stages of decomposition,  
582 while C is respired for energy resulting in relative nutrient enrichment (Reddy and DeLaune

583 2008). Generally, the reactivity of floc and soils differ significantly with floc being much more  
584 reactive than soils as indicated by higher nutrient mineralization rates, nutrient content and  
585 microbial activity (Wright and Reddy 2001b; Neto et al. 2006). In this decomposition continuum  
586 it is expected that N relative to C increases during the transition from vegetation to floc to soil,  
587 while C:P ratios are expected to decline from vegetation to the floc layer, but then increase again  
588 as P mining becomes the dominant P redistribution mechanism in the soil. This decomposition,  
589 redistribution and nutrient utilization dynamics is apparent in stoichiometric relationships  
590 observed in this study (Fig 4, 5, 6 and 7), with the notable difference that C:N ratios did not  
591 further narrow in their transition from floc to soil.

592 Inspection of N to P stoichiometric relationships between floc and soils also revealed critical  
593 differences between FW1 (EAV) and FW3 (SAV) (Fig 6). In FW3, Floc TN:TP ratios in mid and  
594 outflow regions of the FW with much lower nutrient loading hover mostly around 60 molar ratio,  
595 while soil ratios are widely dispersed and vary between ~60 to ~180. In contrast, in FW 1, floc  
596 TN:TP ratios varied by more than a factor of 2, while soil ratios had a much smaller range. Both  
597 FWs had critically narrower TN:TP ratios at the inflow compartment to other locations in the FW.  
598 The stoichiometry of the midflow section veered more away from inflow characteristics in FW 3  
599 than FW 1. The lack of a N:P ceiling in soil (but not in floc) in FW 3 could indicate that the soil  
600 compartment is continued to be depleted in P with decreasing nutrient load to the system (i.e.  
601 increasing distance downstream). The N:P pattern between floc and soil suggests that the  
602 depletion of P relative to N most likely due vegetation uptake or abiotic immobilization  
603 occurring primarily in floc in FW 1, whereas P depletion occurred mostly in soil in FW 3. This  
604 notion is also confirmed by the differences in N:P slopes of the SMA, where the slopes for floc is  
605 shallower than for soil in FW 1, but steeper in FW 3.

606 Aboveground vegetation SMA slopes also exhibited differences between FWs (i.e. between  
607 EAVs and SAVs). Nutrient stoichiometric relationships in plants reflect to some degrees the  
608 balance between demands of plant growth and nutrient supply rates from sediment and  
609 surrounding water in aquatic ecosystems (Frost et al. 2002). Nutrient and light availability are  
610 key controls on the chemical quality of plant materials and its interaction with the detrital pool  
611 (Evans-White and Halvorson 2017). The relative relationships of C to N or P are also relevant to  
612 the structural composition of the plant where higher C:nutrient values indicate reduced allocation  
613 to low-nutrient structural material (Chimney and Pietro 2006; De Deyn et al. 2008). Nutrient  
614 composition in plant tissues can be an important feature to identify ecological strategies of  
615 species relative to biogeochemical conditions (Tilman 1982). Generally, EAV species invest a  
616 significant quantity of C in their biomass, associated with structural components of different  
617 plant parts and generally have higher net primary production than SAV species (Reddy and  
618 DeLaune 2008; De Deyn et al. 2008). To some degree, SAV could also be light-limited  
619 especially when optical water quality degrades due to the suspension of particulate matter  
620 (Evans-White and Halvorson 2017; Zamorano et al. 2018). However, this seems not to be the  
621 case in FW3 (SAV) with SMA slope suggesting an above-linear increase in C relative to  
622 nutrients and not indicating a limitation for C acquisition. Perhaps with increased nutrient  
623 supply, investments shift to more structural tissues. In contrast, in FW1, relationships remained  
624 isometric except for N:P.

625 Overall, the core concepts of ecological stoichiometry include stoichiometric homeostasis,  
626 threshold elemental ratio and the growth rate hypothesis which lay out the rules for differential  
627 nutrient demand, nutrient recycling, and nutrient transfer from one compartment to the next  
628 (Frost et al. 2002; Sterner and Elser 2002; Van de Waal et al. 2018). Within this framework,

629 comparison of nutrient stoichiometry (C:N:P ratios) under differential nutrient supplies and  
630 across different systems provides insight into the nature of differential nutrient cycling rates and  
631 organization of material, and in particular also nutrient status within the ecosystem in question.  
632 The analysis here confirms earlier work that suggests primarily P limitation (UF-WBL 2017)  
633 where increasing P supply alleviates a deficit of this nutrient relative to others. This allometric  
634 relationship is pervasive in most compartments, especially in FW3 (SAV). The analysis from  
635 inflow to outflow shows a slightly more nuanced picture as the expectation is for increasing P  
636 limitation with distance downstream and thus increasing SMA slopes with P from inflow to  
637 outflow, yet this is more often refuted than confirmed for most compartments. However, drawing  
638 firm conclusions from SMA's along the FW may be limited because of a possible limiting  
639 sample sizes and limited variation of nutrients at specific locations

640 Regarding constrained stoichiometry (allometry vs. isometry), an objective of this work was to  
641 determine whether the relationships are predictable (i.e. *coupled*), with sufficient variance  
642 explained in the SMA relationship. Thus, our definition of coupled accepts both isometric and  
643 allometric scaling (Fig 1). We find that the log-log regressions explain much less variance in the  
644 water column compared to other compartments, to a point that is borderline decoupled by our  
645 definition. A possible mechanism to cause decoupled or unconstrained stoichiometric  
646 relationships in a system would be an external nutrient load that is variable and overwhelms the  
647 local system. High external loads with an “unbalanced” stoichiometry, especially in the case of  
648 stormwater run-off where waters can have a disproportionate amount of N or P ultimately  
649 disrupting local nutrient cycling, and subsequently local stoichiometric ratios. If such load is  
650 large and variable, the system is then in a pervasive state of disequilibrium, leaving the water  
651 column in a borderline decoupled state (low  $R^2$ ) with variable and largely unpredictable

652 stoichiometry. Ultimately, allochthonous inputs have the potential to alter endogenous processes  
653 such as nutrient cycling and decomposition of OM. In this study, nutrient load was variable  
654 across sampling events occurring during specific flow events with large fluctuation in input of  
655 new nutrients (Fig S2). This may be a major reason that stoichiometric relationships in the water  
656 column appear to be close to a decoupled state (i.e.  $R^2 < 0.25$ ). However, on the longer  
657 timescales for which vegetation, floc and soil operate, stoichiometry appears to become more  
658 coupled and thus predictable (high  $R^2$ ). It is interesting, though, that there is no evidence of  
659 stoichiometry becoming more coupled along the FW, suggesting that the mechanisms of  
660 preferential removal or selective fixation cannot restore the stoichiometric imbalance in the water  
661 column over the time it takes to move from inflow to outflow.

662 While not explicitly studied here, differences in uptake rate and nutrient form (i.e. dissolved  
663 versus particulate) can influence stoichiometric relationships, especially when stoichiometry is  
664 analyzed simply based on the water column nutrient content without considering the biotic  
665 component and a nutrient source. The prevailing paradigm of the Redfield ratio is consistency in  
666 both, the mineral nutrients and the organic matter which applies well to oceanic systems.  
667 Meanwhile in lake ecosystems, spatial and temporal variation in nutrient supply, overall higher  
668 seston nutrient content as well as contrasting system configurations and hydrodynamics when  
669 compared to oceanic systems contribute to more overall variability in composition and  
670 stoichiometry (Sterner et al. 2008). Generally, the water column of FW1 and FW3 showed some  
671 characteristics of a lake ecosystem more so than a marine ecosystem exhibiting a high degree of  
672 variability in nutrient stoichiometry. The biogeochemistry of treatment wetlands characterized  
673 here create a systematically decreasing load along the FW in which sedimentation of organic  
674 particulates and transport of dissolved nutrients may lead to preferential stoichiometry of

675 retention in different compartments developing a strong spatial chemical gradient (Engle and  
676 Melack 1993; Sánchez-Carrillo et al. 2001; Angeler et al. 2007). This is evident in our study with  
677 slope values along FWs being highly variable with generally higher variability at the inflow  
678 regions especially with respect to DOC to TN comparisons (Fig 8).

679

### 680 *Conclusion and Further Research*

681 Prior studies of stoichiometry suggest that the relationship between C and nutrients is tightly  
682 constrained and C:N:P stoichiometric relationships are relatively constrained and consistent with  
683 elemental composition of dominant phototrophs (i.e. algae and phytoplankton) in the water  
684 column and microbial biomass in soil (Redfield 1958; Elser et al. 2000, 2007; Cleveland and  
685 Liptzin 2007; Sterner et al. 2008; Xu et al. 2013). At a finer scale, as exemplified in this study  
686 nutrient stoichiometric relationships within treatment wetlands evaluated in this study were  
687 unconstrained through processes influenced by high loading resulting in nutrient enrichment  
688 causing disruption of biotic-feedback loops, variable mineralization/immobilization rates,  
689 selective removal of water column constituents via biotic uptake or, physical settling, and/or  
690 active mining for limiting nutrients in soils. As a consequence, stoichiometric relationships  
691 across different ecosystem compartments varied along nutrient gradients and ecosystem types. At  
692 the onset of this study two hypotheses were suggested. The first hypothesis which stated that  
693 stoichiometric relationships will differ between FWs was supported as the comparison of SMA  
694 slopes was significantly different for most stoichiometric relationships except for TC by TP and  
695 TN by TP in the floc compartment and for TN by TP in live AGB. The second hypothesis that  
696 stoichiometric relationships will change along FWs was supported with most FW regional (i.e.  
697 Inflow, Mid and Outflow) SMA slopes being significantly different within FWs but not

698 consistently between FWs. Moreover, based on FW regional SMA model results stoichiometric  
699 scaling within these regions and the degree of coupling was highly variable along each FW with  
700 respect to C, N and P stoichiometry (Table 2 and 3).

701 Evaluation of stoichiometric relationships within ecosystem compartments provides a greater  
702 understanding of how nutrients and OM cycle through a system relative to one another (i.e.  
703 relative enrichment or depletion) and the degree of process coupling such as the diametrically  
704 opposed relationships between DOC and TP in the water column along each FW. Scaling  
705 properties of nutrients, as indicated by power law slopes in a stoichiometric framework, provide  
706 an understanding of fundamental relationships and processes in natural systems, and variability  
707 in these relationships can offer insight into underlying biogeochemical mechanisms (Brown et al.  
708 2002; Marquet et al. 2005; Wymore *Unpublished Data*). Divergent stoichiometric relationships  
709 of C, N and P from a proportional scaling model (i.e. isometric; Fig 1) suggest how nutrients are  
710 retained within the ecosystem could be used to understand treatment wetland performance and  
711 expectations. In the context of the Everglades STAs, optimization for P-retention must go  
712 beyond a focus on P and P-forms (i.e. organic versus inorganic) but also focus on other  
713 constituents including C and N. Building from this work, future studies should address the  
714 potential for preferential removal and utilization of nutrients from different substrates and  
715 organisms (uptake and mining in macrophytes, immobilization of nutrients) to further understand  
716 ecosystem nutrient uptake and retention.

717

718 **Acknowledgements**

719 We would like to thank SFWMD and UF Wetland Biogeochemistry Laboratory staff members  
720 for providing the data used in this analysis. We would also like to thank Mark Brenner, Sue  
721 Newman, K. Ramesh Reddy, Odi Villapando, Delia Ivanoff and the anonymous peer reviewer(s)  
722 and editor(s) for their efforts and constructive review of this manuscript.

### 723 **Conflict of Interest Statement**

724 The authors declare that they have no conflict of interest.

### 725 **Funding**

726 Financial support for sample collection and analysis was provided by the South Florida Water  
727 Management District (Contract #4600003031).

### 728 **Authors' Contributions**

729 PJ performed data analyses including necessary calculations and statistical analyses and wrote  
730 the manuscript. SG and ALW contributed to data interpretation and writing. RKB and TZO were  
731 involved with data collection and writing. JK, MP and JD were involved in data collection. All  
732 authors read and approved the final manuscript.

### 733 **References**

- 734 Angeler DG, Sánchez-Carrillo S, Rodrigo MA, et al (2007) Does seston size structure reflect fish-mediated  
735 effects on water quality in a degraded semiarid wetland? *Environ Monit Assess* 125:9–17. doi:  
736 10.1007/s10661-006-9234-5
- 737 Bhomia RK, Reddy KR (2018) Influence of Vegetation on Long-term Phosphorus Sequestration in  
738 Subtropical Treatment Wetlands. *J Environ Qual* 47:361. doi: 10.2134/jeq2017.07.0272
- 739 Brown JH, Gupta VK, Li B-L, et al (2002) The fractal nature of nature: power laws, ecological complexity  
740 and biodiversity. *Philos Trans R Soc B Biol Sci* 357:619–626. doi: 10.1098/rstb.2001.0993
- 741 Bruland GL, Osborne TZ, Reddy KR, et al (2007) Recent Changes in Soil Total Phosphorus in the  
742 Everglades: Water Conservation Area 3. *Environ Monit Assess* 129:379–395. doi: 10.1007/s10661-006-  
743 9371-x



- 744 Chen H, Ivanoff D, Pietro K (2015) Long-term phosphorus removal in the Everglades stormwater  
745 treatment areas of South Florida in the United States. *Ecol Eng* 79:158–168. doi:  
746 10.1016/j.ecoleng.2014.12.012
- 747 Chimney M (2017) Performance of the Everglades Stormwater Treatment Areas. In: 2017 South Florida  
748 Environmental Report. South Florida Water Management District, West Palm Beach, FL
- 749 Chimney MJ, Pietro KC (2006) Decomposition of macrophyte litter in a subtropical constructed wetland  
750 in south Florida (USA). *Ecol Eng* 27:301–321. doi: 10.1016/j.ecoleng.2006.05.016
- 751 Cleveland CC, Liptzin D (2007) C:N:P stoichiometry in soil: is there a “Redfield ratio” for the microbial  
752 biomass? *Biogeochemistry* 85:235–252. doi: 10.1007/s10533-007-9132-0
- 753 Collins SM, Oliver SK, Lapierre J-F, et al (2017) Lake nutrient stoichiometry is less predictable than  
754 nutrient concentrations at regional and sub-continental scales. *Ecol Appl* 27:1529–1540. doi:  
755 10.1002/eap.1545
- 756 Corstanje R, Grafius DR, Zawadzka J, et al (2016) A datamining approach to identifying spatial patterns of  
757 phosphorus forms in the Stormwater Treatment Areas in the Everglades, US. *Ecol Eng* 97:567–576. doi:  
758 10.1016/j.ecoleng.2016.10.003
- 759 Davis SM (1991) Growth, decomposition, and nutrient retention of *Cladium jamaicense* Crantz and  
760 *Typha domingensis* Pers. in the Florida Everglades. *Aquat Bot* 40:203–224. doi: 10.1016/0304-  
761 3770(91)90059-E
- 762 De Deyn GB, Cornelissen JHC, Bardgett RD (2008) Plant functional traits and soil carbon sequestration in  
763 contrasting biomes. *Ecol Lett* 11:516–531. doi: 10.1111/j.1461-0248.2008.01164.x
- 764 Dodds W, Smith V (2016) Nitrogen, phosphorus, and eutrophication in streams. *Inland Waters* 6:155–  
765 164. doi: 10.5268/IW-6.2.909
- 766 Dodds WK (2003) Misuse of inorganic N and soluble reactive P concentrations to indicate nutrient status  
767 of surface waters. *J North Am Benthol Soc* 22:171–181
- 768 Dodds WK, Smith VH, Lohman K (2002) Nitrogen and phosphorus relationships to benthic algal biomass  
769 in temperate streams. *Can J Fish Aquat Sci* 59:865–874. doi: 10.1139/f02-063
- 770 Dombrowski J, Powers M, Zamorano M, et al (2018) Appendix 5B-5: Submerged Aquatic Vegetation  
771 Coverage in the Stormwater Treatment Areas Based on Ground Surveys. In: South Florida Environmental  
772 Report. South Florida Water Management District, West Palm Beach, FL
- 773 Droppo IG (2001) Rethinking what constitutes suspended sediment. *Hydrol Process* 15:1551–1564. doi:  
774 10.1002/hyp.228
- 775 Elser JJ, Andersen T, Baron JS, et al (2009) Shifts in Lake N:P Stoichiometry and Nutrient Limitation  
776 Driven by Atmospheric Nitrogen Deposition. *Science* 326:835–837. doi: 10.1126/science.1176199
- 777 Elser JJ, Bracken MES, Cleland EE, et al (2007) Global analysis of nitrogen and phosphorus limitation of  
778 primary producers in freshwater, marine and terrestrial ecosystems. *Ecol Lett* 10:1135–1142. doi:  
779 10.1111/j.1461-0248.2007.01113.x

- 780 Elser JJ, Fagan WF, Denno RF, et al (2000) Nutritional constraints in terrestrial and freshwater food webs.  
781 Nature 408:578
- 782 Engle DL, Melack JM (1993) Consequences of riverine flooding for seston and the periphyton of floating  
783 meadows in an Amazon floodplain lake. *Limnol Oceanogr* 38:1500–1520. doi:  
784 10.4319/lo.1993.38.7.1500
- 785 Evans-White MA, Halvorson HM (2017) Comparing the Ecological Stoichiometry in Green and Brown  
786 Food Webs – A Review and Meta-analysis of Freshwater Food Webs. *Front Microbiol* 8:. doi:  
787 10.3389/fmicb.2017.01184
- 788 Frost PC, Stelzer RS, Lamberti GA, Elser JJ (2002) Ecological stoichiometry of trophic interactions in the  
789 benthos: understanding the role of C:N:P ratios in lentic and lotic habitats. *J North Am Benthol Soc*  
790 21:515–528. doi: 10.2307/1468427
- 791 Geider R, La Roche J (2002) Redfield revisited: variability of C:N:P in marine microalgae and its  
792 biochemical basis. *Eur J Phycol* 37:1–17. doi: 10.1017/S0967026201003456
- 793 Goforth G (2007) Updated STA Phosphorus Modeling for the 2010 Planning Period. South Florida Water  
794 Management District, West Palm Beach, FL
- 795 Guildford SJ, Hecky RE (2000) Total nitrogen, total phosphorus, and nutrient limitation in lakes and  
796 oceans: Is there a common relationship? *Limnol Oceanogr* 45:1213–1223. doi:  
797 10.4319/lo.2000.45.6.1213
- 798 Helton AM, Ardón M, Bernhardt ES (2015) Thermodynamic constraints on the utility of ecological  
799 stoichiometry for explaining global biogeochemical patterns. *Ecol Lett* 18:1049–1056. doi:  
800 10.1111/ele.12487
- 801 Hessen DO, Andersen T, Brettum P, Faafeng BA (2003) Phytoplankton contribution to sestonic mass and  
802 elemental ratios in lakes: Implications for zooplankton nutrition. *Limnol Oceanogr* 48:1289–1296. doi:  
803 10.4319/lo.2003.48.3.1289
- 804 Howard-Williams C (1985) Cycling and retention of nitrogen and phosphorus in wetlands: a theoretical  
805 and applied perspective. *Freshw Biol* 15:391–431. doi: 10.1111/j.1365-2427.1985.tb00212.x
- 806 Julian P, Gerber S, Wright AL, et al (2017) Carbon pool trends and dynamics within a subtropical  
807 peatland during long-term restoration. *Ecol Process* 6:43–57. doi: 10.1186/s13717-017-0110-8
- 808 Juston J, DeBusk TA (2006) Phosphorus mass load and outflow concentration relationships in  
809 stormwater treatment areas for Everglades restoration. *Ecol Eng* 26:206–223. doi:  
810 10.1016/j.ecoleng.2005.09.011
- 811 Juston JM, DeBusk TA (2011) Evidence and implications of the background phosphorus concentration of  
812 submerged aquatic vegetation wetlands in Stormwater Treatment Areas for Everglades restoration.  
813 *Water Resour Res* 47:. doi: 10.1029/2010WR009294
- 814 Juston JM, DeBusk TA, Grace KA, Jackson SD (2013) A model of phosphorus cycling to explore the role of  
815 biomass turnover in submerged aquatic vegetation wetlands for Everglades restoration. *Ecol Model*  
816 251:135–149. doi: 10.1016/j.ecolmodel.2012.12.001

- 817 Kadlec RH, Wallace SD (2009) Treatment wetlands. CRC Press, Boca Raton, FL
- 818 Lenton TM, Watson AJ (2000) Redfield revisited: 1. Regulation of nitrate, phosphate, and oxygen in the  
819 ocean. *Glob Biogeochem Cycles* 14:225–248
- 820 Marquet PA, Quinones RA, Abadas S, et al (2005) Scaling and power-laws in ecological systems. *J Exp*  
821 *Biol* 208:1749–1769. doi: 10.1242/jeb.01588
- 822 McGroddy ME, Daufresne T, Hedin LO (2004) Scaling of C:N:P stoichiometry in forests worldwide:  
823 implications of terrestrial redfield-type ratios. *Ecology* 85:2390–2401. doi: 10.1890/03-0351
- 824 Neto RR, Mead RN, Louda JW, Jaffé R (2006) Organic Biogeochemistry of Detrital Flocculent Material  
825 (Floc) in a Subtropical, Coastal Wetland. *Biogeochemistry* 77:283–304. doi: 10.1007/s10533-005-5042-1
- 826 Newman S, McCormick PV, Miao SL, et al (2004) The effect of phosphorus enrichment on the nutrient  
827 status of a northern Everglades slough. *Wetl Ecol Manag* 12:63–79. doi:  
828 10.1023/B:WETL.0000021664.32137.dd
- 829 Newman S, Osborne TZ, Hagerthey SE, et al (2017) Drivers of landscape evolution: multiple regimes and  
830 their influence on carbon sequestration in a sub-tropical peatland. *Ecol Monogr* 87:578–599. doi:  
831 10.1002/ecm.1269
- 832 Noe GB, Scinto LJ, Taylor J, et al (2003) Phosphorus cycling and partitioning in an oligotrophic Everglades  
833 wetland ecosystem: a radioisotope tracing study. *Freshw Biol* 48:1993–2008. doi: 10.1046/j.1365-  
834 2427.2003.01143.x
- 835 Odum EP, Finn JT, Franz EH (1979) Perturbation Theory and the Subsidy-Stress Gradient. *BioScience*  
836 29:349–352. doi: 10.2307/1307690
- 837 Osborne TZ, Bruland GL, Newman S, et al (2011a) Spatial distributions and eco-partitioning of soil  
838 biogeochemical properties in the Everglades National Park. *Environ Monit Assess* 183:395–408. doi:  
839 10.1007/s10661-011-1928-7
- 840 Osborne TZ, Newman S, Scheidt DJ, et al (2011b) Landscape Patterns of Significant Soil Nutrients and  
841 Contaminants in the Greater Everglades Ecosystem: Past, Present, and Future. *Crit Rev Environ Sci*  
842 *Technol* 41:121–148. doi: 10.1080/10643389.2010.530930
- 843 Reddy KR, DeLaune RD (2008) Biogeochemistry of wetlands: science and applications. CRC Press, Boca  
844 Raton, FL
- 845 Reddy KR, Kadlec RH, Flaig E, Gale PM (1999) Phosphorus Retention in Streams and Wetlands: A Review.  
846 *Crit Rev Environ Sci Technol* 29:83–146. doi: 10.1080/10643389991259182
- 847 Redfield AC (1934) On the proportions of organic derivations in seawater and their relation to the  
848 composition of plankton (reprint). *Benchmark Pap Ecol* 1:
- 849 Redfield AC (1958) The biological control of chemical factors in the environment. *Am Sci* 46:230A–221
- 850 Sánchez-Carrillo S, Álvarez-Cobelas M, Angeler DG (2001) Sedimentation in the semi-arid freshwater  
851 wetland las tablas de Daimiel (Spain). *Wetlands* 21:112–124. doi: 10.1672/0277-  
852 5212(2001)021[0112:SITSAF]2.0.CO;2

- 853 SFWMD (2012) Restoration strategies regional water quality plan. South Florida Water Management  
854 District, West Palm Beach, FL
- 855 Sterner RW (2008) On the Phosphorus Limitation Paradigm for Lakes. *Int Rev Hydrobiol* 93:433–445. doi:  
856 10.1002/iroh.200811068
- 857 Sterner RW, Andersen T, Elser JJ, et al (2008) Scale-dependent carbon: nitrogen: phosphorus seston  
858 stoichiometry in marine and freshwaters. *Limnol Oceanogr* 53:1169
- 859 Sterner RW, Elser JJ (2002) *Ecological Stoichiometry: The Biology of Elements from Molecules to the*  
860 *Biosphere*. Princeton University Press
- 861 They NH, Amado AM, Cotner JB (2017) Redfield Ratios in Inland Waters: Higher Biological Control of  
862 C:N:P Ratios in Tropical Semi-arid High Water Residence Time Lakes. *Front Microbiol* 8:. doi:  
863 10.3389/fmicb.2017.01505
- 864 Tilman D (1982) *Resource Competition and Community Structure*. Princeton University Press
- 865 UF-WBL (2017) Evaluation of Soil Biogeochemical Properties Influencing Phosphorus Flux in the  
866 Everglades Stormwater Treatment areas: 2016–2017 Annual Report. University of Florida, Gainesville, FL
- 867 Valett HM, Thomas SA, Mulholland PJ, et al (2008) Endogenous and Exogenous Control of Ecosystem  
868 Function: N Cycling in Headwater Streams. *Ecology* 89:3515–3527. doi: 10.1890/07-1003.1
- 869 Van de Waal DB, Elser JJ, Martiny AC, et al (2018) Editorial: Progress in Ecological Stoichiometry. *Front*  
870 *Microbiol* 9:. doi: 10.3389/fmicb.2018.01957
- 871 Walker WW (1995) Design Basis for Everglades Stormwater Treatment Areas. *JAWRA J Am Water Resour*  
872 *Assoc* 31:671–685. doi: 10.1111/j.1752-1688.1995.tb03393.x
- 873 Walker WW, Kadlec RH (2011) Modeling Phosphorus Dynamics in Everglades Wetlands and Stormwater  
874 Treatment Areas. *Crit Rev Environ Sci Technol* 41:430–446. doi: 10.1080/10643389.2010.531225
- 875 Warton DI, Duursma RA, Falster DS, Taskinen S (2012) smatr 3- an R package for estimation and  
876 inference about allometric lines: The smatr 3 - an R package. *Methods Ecol Evol* 3:257–259. doi:  
877 10.1111/j.2041-210X.2011.00153.x
- 878 Warton DI, Weber NC (2002) Common Slope Tests for Bivariate Errors-in-Variables Models. *Biom J*  
879 44:161–174. doi: 10.1002/1521-4036(200203)44:2<161::AID-BIMJ161>3.0.CO;2-N
- 880 Warton DI, Wright IJ, Falster DS, Westoby M (2006) Bivariate line-fitting methods for allometry. *Biol Rev*  
881 81:259–291. doi: 10.1017/S1464793106007007
- 882 Wright AL, Reddy KR (2001a) Phosphorus loading effects on extracellular enzyme activity in Everglades  
883 wetland soils. *Soil Sci Soc Am J* 65:588–595
- 884 Wright AL, Reddy KR (2001b) Heterotrophic Microbial Activity in Northern Everglades Wetland Soils. *Soil*  
885 *Sci Soc Am J* 65:1856. doi: 10.2136/sssaj2001.1856

886 Wymore AS, Brereton RL, Ibarra DE, et al (2017) Critical zone structure controls concentration-discharge  
887 relationships and solute generation in forested tropical montane watersheds. *Water Resour Res*  
888 53:6279–6295. doi: 10.1002/2016WR020016

889 Xu X, Thornton PE, Post WM (2013) A global analysis of soil microbial biomass carbon, nitrogen and  
890 phosphorus in terrestrial ecosystems. *Glob Ecol Biogeogr* 22:737–749. doi: 10.1111/geb.12029

891 Zamorano MF, Bhomia RK, Chimney MJ, Ivanoff D (2018) Spatiotemporal changes in soil phosphorus  
892 characteristics in a submerged aquatic vegetation-dominated treatment wetland. *J Environ Manage*  
893 228:363–372. doi: 10.1016/j.jenvman.2018.09.032

894

895

896 **Figures and Tables**

897

898 Figure 1. Top: Conceptual model for power law slope ( $\beta$ ) interpretation relative to log  
899 transformed nutrient concentrations and relationship to stoichiometric ratios (i.e. X:Y). Bottom:  
900 Cross walk and function definitions of constrained/unconstrained and coupled/decoupled.

901 Figure 2. Surface water, soil and vegetation monitoring locations within Everglades Stormwater  
902 Treatment Area-2 Cells 1 (right) and 3 (left). Cell 1 is predominately emergent vegetation and  
903 Cell 3 is predominately submerged aquatic vegetation. Operationally these cells are identified as  
904 flow-way 1 and 3, respectively.

905

906 Figure 3. Stoichiometric relationships between dissolved organic carbon (DOC), total  
907 phosphorus (TP) and total nitrogen (TN) in the surface water ecosystem compartment for  
908 Stormwater Treatment Area 2, flow-ways (FWs) 1 and 3. Inflow, mid, outflow and overall  
909 standardized major axis (SMA) regressions are indicated by lines through the data. Values can be  
910 converted to mass per volume (i.e. milligram per liter) concentration by multiplying each value  
911 by its respective conversion factor (C = 12.01; N = 14.00; P = 30.97).

912 Figure 4. Stoichiometric relationships between total carbon (TC), total phosphorus (TP) and total  
913 nitrogen (TN) in the floc ecosystem compartment for Stormwater Treatment Area 2, flow-ways  
914 (FWs) 1 and 3. Inflow, mid, outflow and overall standardized major axis (SMA) regressions are  
915 indicated by lines through the data. Values can be converted to mass per volume (i.e. milligram  
916 per kilogram) concentration by multiplying each value by its respective conversion factor (C =  
917 12.01; N = 14.00; P = 30.97).

918 Figure 5. Stoichiometric relationships between total carbon (TC), total phosphorus (TP) and total  
919 nitrogen (TN) in the soil ecosystem compartment for Stormwater Treatment Area 2, flow-ways  
920 (FWs) 1 and 3. Inflow, mid, outflow and overall standardized major axis (SMA) regressions  
921 indicated by lines through the data. Values can be converted to mass per volume (i.e. milligram  
922 per kilogram) concentration by multiplying each value by its respective conversion factor (C =  
923 12.01; N = 14.00; P = 30.97).

924 Figure 6. Comparison of floc and soil TN:TP molar ratio with location along the flow-way  
925 identified by size of point (i.e. larger point further down flow path) and distance categories.

926 Figure 7. Stoichiometric relationships between total carbon (TC), total phosphorus (TP) and total  
927 nitrogen (TN) in vegetation ecosystem compartment for Stormwater Treatment Area 2, flow-  
928 ways (FWs) 1 and 3. Inflow, mid, outflow and overall standardized major axis (SMA)  
929 regressions indicated by lines through the data. Values can be converted to mass of nutrient per  
930 mass of soil (i.e. milligram per kilogram) concentration by multiplying each value by its  
931 respective conversion factor (C = 12.01; N = 14.00; P = 30.97).

932 Figure 8. Surface water inflow, mid, outflow and overall standardized major axis slope values  
933 with  $\pm$  95% confidence interval for dissolved organic carbon (DOC), total phosphorus (TP) and

934 total nitrogen (TN) comparisons. Slopes significantly different from one are identified with red  
935 asterisks above the upper 95% confidence interval bar.

936 Figure 9. Flocculent and soil inflow, mid, outflow and overall standardized major axis slope  
937 values with  $\pm$  95% confidence interval for total carbon (TC), total phosphorus (TP) and total  
938 nitrogen (TN) comparisons. Slopes significantly different from one are identified with red  
939 asterisks above the upper 95% confidence interval bar.

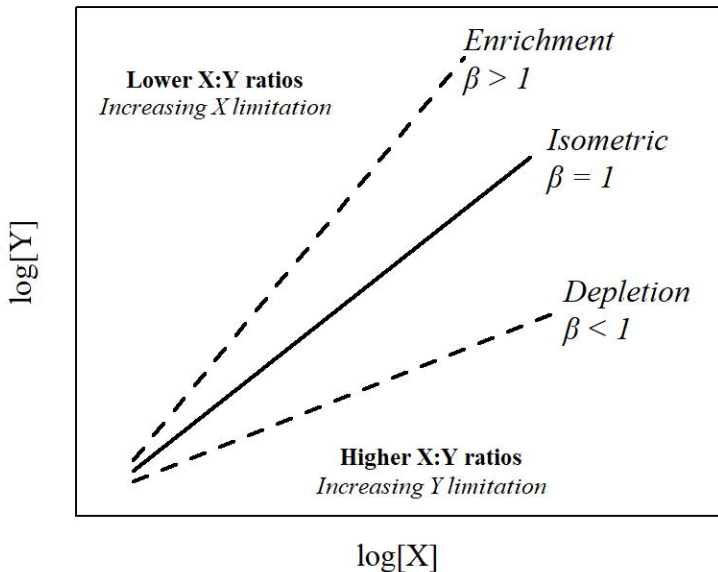

|                                      |           | Process (i.e. slope)                                                         |                                                                                        |
|--------------------------------------|-----------|------------------------------------------------------------------------------|----------------------------------------------------------------------------------------|
|                                      |           | Constrained                                                                  | Unconstrained                                                                          |
| Relativity<br>(i.e. Goodness of fit) | Coupled   | Proportional Scaling<br>(Slope = 1)<br><br>High Correlation<br>(High $R^2$ ) | Dis-proportional<br>Scaling (Slope $\neq 1$ )<br><br>High Correlation<br>(High $R^2$ ) |
|                                      | Decoupled |                                                                              | Dis-proportional<br>Scaling (Slope $\neq 1$ )<br><br>Low Correlation<br>(Low $R^2$ )   |



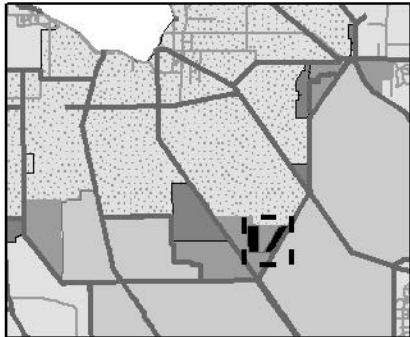

- ✕ Vegetation Monitoring Location
- ✚ Water Quality Monitoring Location
- Soil Monitoring Location
- ▭ STA-2 Study Cells
- Canal
- Water Control Structures
- ▨ Everglades Agricultural Area
- ▩ Everglades Protection Area

Miles

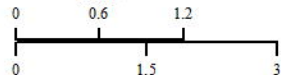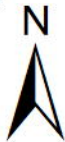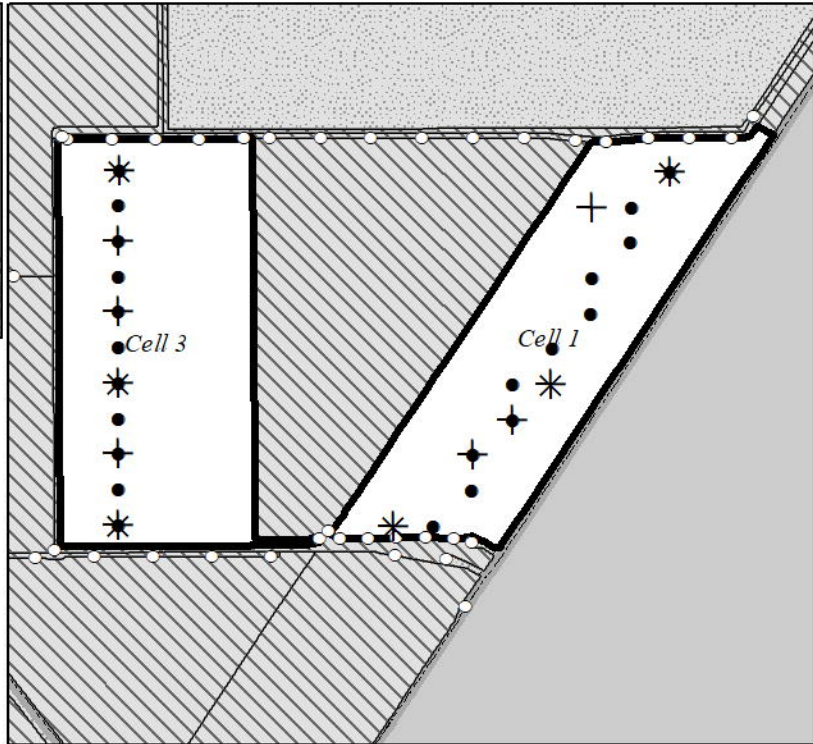

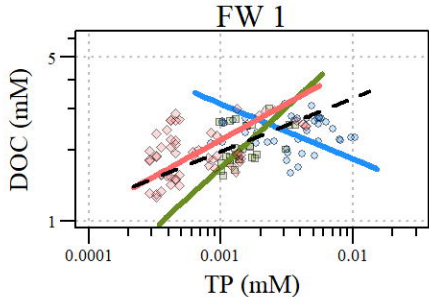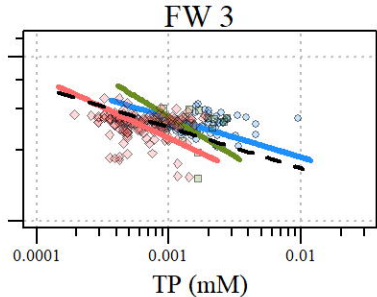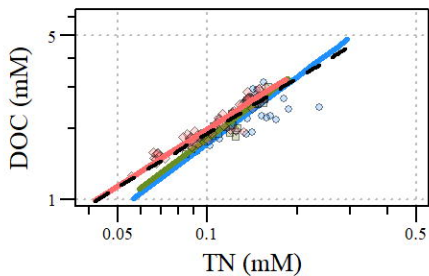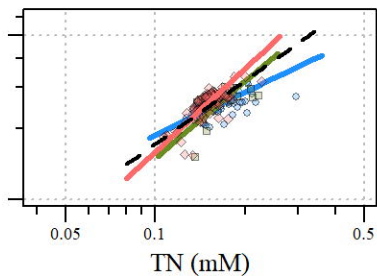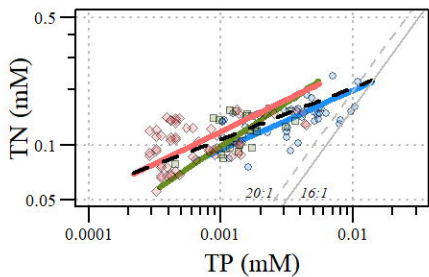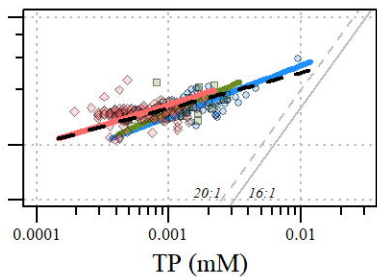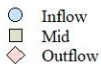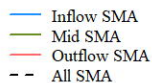

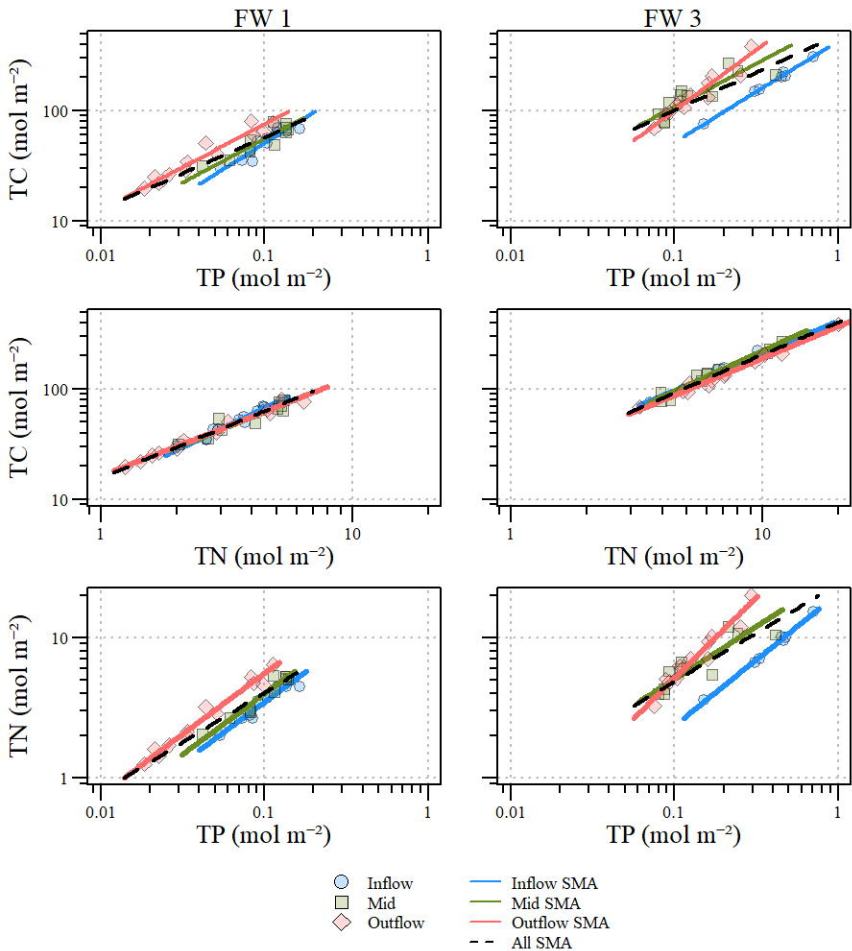

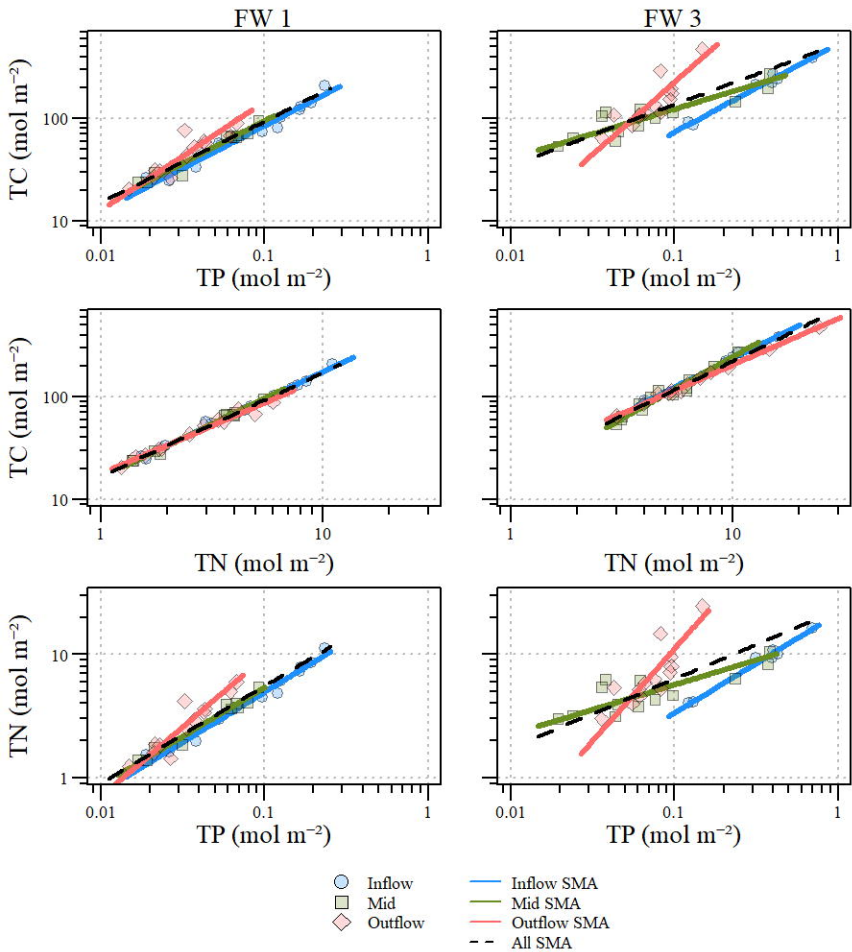

FW 1

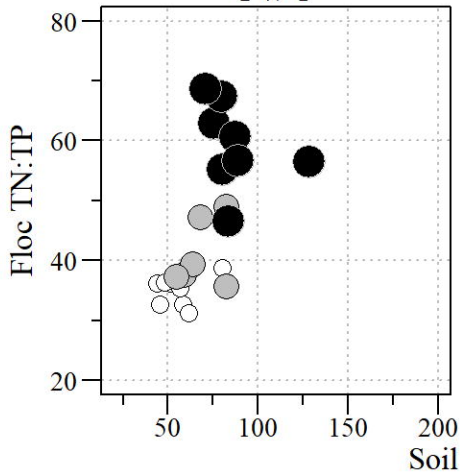

FW 3

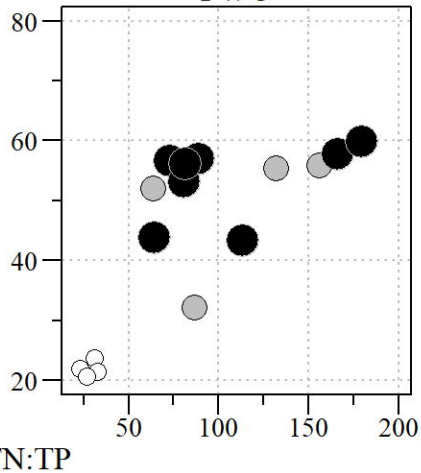

○ Inflow    ● Mid    ● Outflow

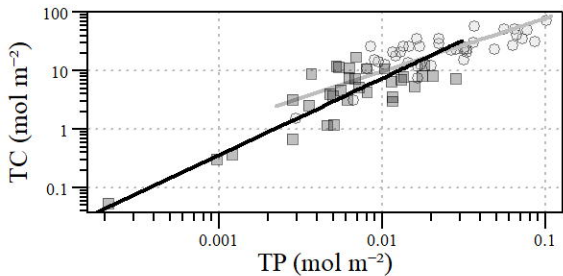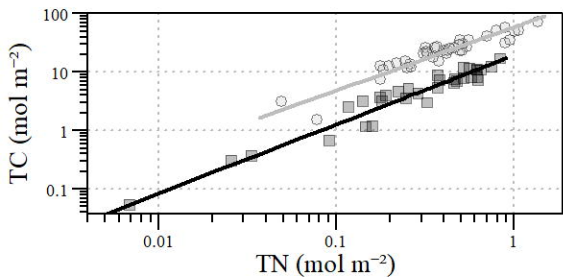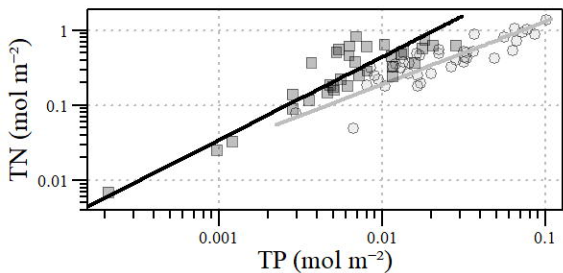

○ FW1      — FW1 SMA  
■ FW3      — FW3 SMA

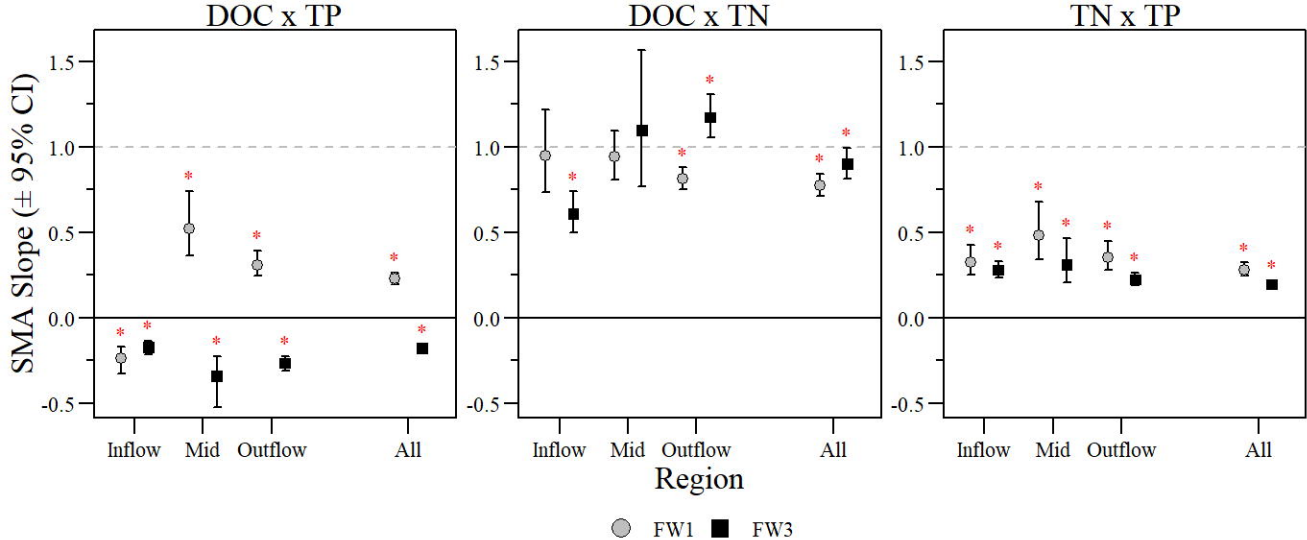

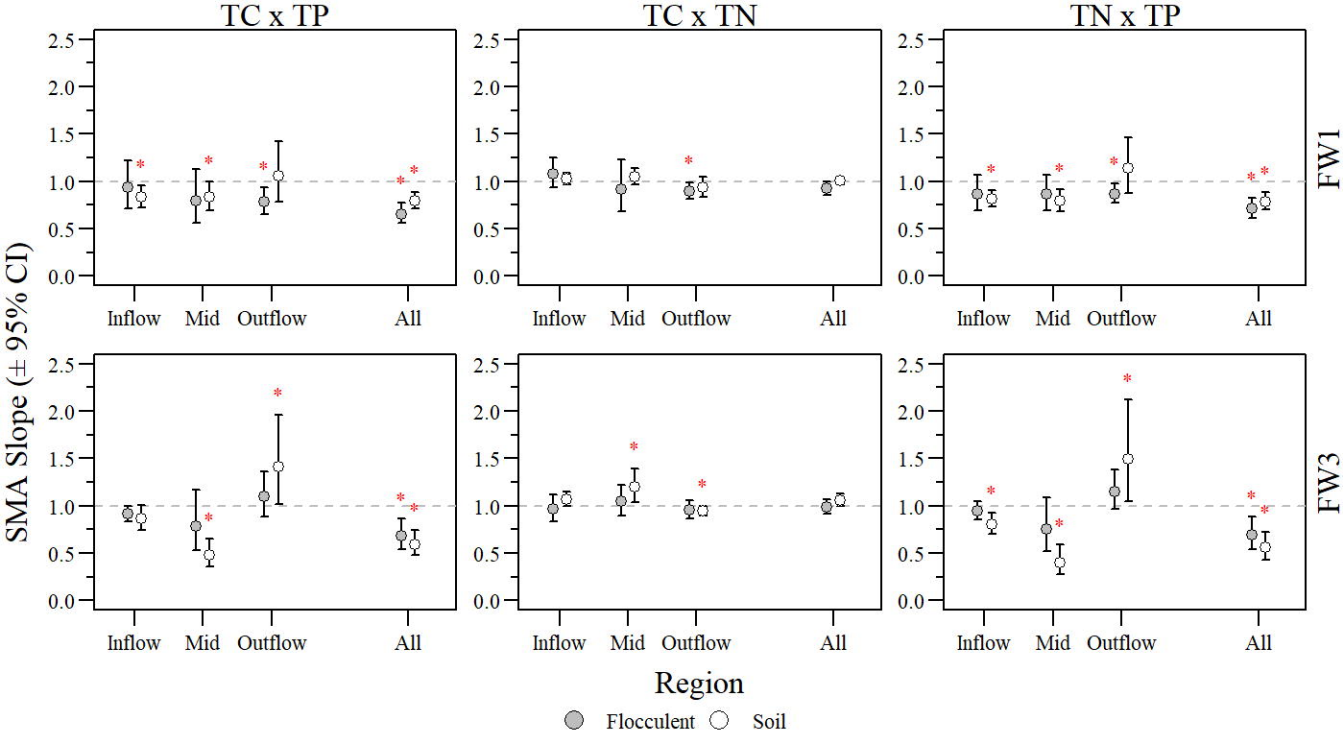



Table 1. Summary statistics for parameters and matrices used in this study of samples collected along the Flow ways 1 and 3 flow-path transect within Stormwater Treatment Area-2. Summary statistics expressed as mean  $\pm$  standard error (sample size). Matrices include surface water, soil flocculent material, recently accreted soil and living aboveground biomass of sampled vegetation. Stoichiometric ratios are expressed as molar ratios and are unitless. (DOC = Dissolved Organic Carbon; TP = Total Phosphorus; TN = Total Nitrogen; TC = Total Carbon; LOI = Loss-On-Ignition).

| Compartment   | Parameter                         | FW 1                     | FW 3                      |
|---------------|-----------------------------------|--------------------------|---------------------------|
| Surface Water | pH (SU) †                         | 7.4 $\pm$ 0.0009 (65608) | 8.4 $\pm$ 0.002 (54698)   |
|               | Dissolved Oxygen (% Sat) †        | 14.5 $\pm$ 0.08 (51125)  | 102.1 $\pm$ 0.34 (52865)  |
|               | DOC (mM)                          | 2.2 $\pm$ 0.04 (140)     | 2.6 $\pm$ 0.02 (249)      |
|               | TP (mM)                           | 0.002 $\pm$ 0.0002 (146) | 0.001 $\pm$ 0.00006 (241) |
|               | TN (mM)                           | 0.1 $\pm$ 0.003 (141)    | 0.2 $\pm$ 0.001 (249)     |
|               | DOC:TP (unitless)                 | 2210 $\pm$ 162 (126)     | 3545 $\pm$ 151 (241)      |
|               | DOC:TN (unitless)                 | 18.7 $\pm$ 0.2 (129)     | 16.6 $\pm$ 0.11 (249)     |
|               | TN:TP (unitless)                  | 117.6 $\pm$ 8.4 (127)    | 206 $\pm$ 8.0 (241)       |
| Floc          | LOI (%)                           | 76.4 $\pm$ 2.1 (34)      | 22.7 $\pm$ 1.2 (35)       |
|               | Bulk Density (g cm <sup>3</sup> ) | 0.03 $\pm$ 0.003 (37)    | 0.12 $\pm$ 0.007 (37)     |
|               | TC (mol m <sup>-2</sup> )         | 50.2 $\pm$ 3.1 (34)      | 159.7 $\pm$ 13.5 (35)     |
|               | TP (mol m <sup>-2</sup> )         | 0.08 $\pm$ 0.007 (34)    | 0.21 $\pm$ 0.03 (35)      |
|               | TN (mol m <sup>-2</sup> )         | 3.5 $\pm$ 0.2 (34)       | 7.8 $\pm$ 0.7 (35)        |
|               | TC:TP (unitless)                  | 671 $\pm$ 38.6 (34)      | 908 $\pm$ 56 (35)         |
|               | TC:TN (unitless)                  | 14.5 $\pm$ 0.2 (34)      | 20.6 $\pm$ 0.3 (35)       |
|               | TN:TP (unitless)                  | 46.0 $\pm$ 2.3 (34)      | 44.3 $\pm$ 2.8 (35)       |
| Soil          | LOI (%)                           | 81.2 $\pm$ 1.4 (34)      | 54.2 $\pm$ 3.4 (34)       |
|               | Bulk Density (g cm <sup>3</sup> ) | 0.08 $\pm$ 0.004 (37)    | 0.22 $\pm$ 0.01 (37)      |
|               | TC (mol m <sup>-2</sup> )         | 63.8 $\pm$ 7.0 (34)      | 156 $\pm$ 17.0 (33)       |
|               | TP (mol m <sup>-2</sup> )         | 0.07 $\pm$ 0.009 (34)    | 16.4 $\pm$ 0.8 (33)       |
|               | TN (mol m <sup>-2</sup> )         | 3.8 $\pm$ 0.4(34)        | 1442 $\pm$ 79.6 (33)      |
|               | TC:TP (unitless)                  | 1125 $\pm$ 55 (34)       | 1605 $\pm$ 149 (33)       |
|               | TC:TN (unitless)                  | 16.9 $\pm$ 0.2 (34)      | 21.6 $\pm$ 0.4 (33)       |
|               | TN:TP (unitless)                  | 66.5 $\pm$ 3.2 (34)      | 78.0 $\pm$ 8.2 (33)       |
| Vegetation    | LOI (%)                           | 92.6 $\pm$ 0.3 (39)      | 53.8 $\pm$ 2.7 (33)       |
|               | Biomass (g cm <sup>2</sup> )      | 719 $\pm$ 67.3 (39)      | 303 $\pm$ 41.7 (33)       |
|               | TC (mol m <sup>-2</sup> )         | 25.5 $\pm$ 2.4 (39)      | 6.1 $\pm$ 0.7 (33)        |
|               | TP (mol m <sup>-2</sup> )         | 0.03 $\pm$ 0.004 (39)    | 0.008 $\pm$ 0.001 (33)    |
|               | TN (mol m <sup>-2</sup> )         | 0.5 $\pm$ 0.05 (39)      | 0.4 $\pm$ 0.04 (33)       |
|               | TC:TP (unitless)                  | 1055 $\pm$ 96.5 (39)     | 845 $\pm$ 116 (33)        |
|               | TC:TN (unitless)                  | 56 $\pm$ 2.0 (39)        | 16.1 $\pm$ 0.8 (33)       |
|               | TN:TP (unitless)                  | 18.2 $\pm$ 1.2 (39)      | 48.1 $\pm$ 4.8 (33)       |

† Data from 15-minute/30-minute logged data using water quality sondes deployed during flow events.

Table 2. Surface water standardized major axis regression results for flow way 1 (FW 1) and FW 3 within Stormwater Treatment Area-2 for Inflow, Mid, Outflow and Entire FW (ALL) regions. Stoichiometric comparisons include Dissolved Organic Carbon to Total Phosphorus (DOC:TP), Dissolved Organic Carbon to Total Nitrogen (DOC:TN) and Total Nitrogen to Total Phosphorus (TN:TP).

| Compartment | Parameter | Region  | FW 1           |       |         |         | FW 3           |       |         |         |
|-------------|-----------|---------|----------------|-------|---------|---------|----------------|-------|---------|---------|
|             |           |         | R <sup>2</sup> | Slope | F-value | p-value | R <sup>2</sup> | Slope | F-value | p-value |
| Water       | DOC x TP  | Inflow  | 0.0001         | -0.24 | 155.8   | <0.01   | 0.0006         | -0.17 | 612.3   | <0.01   |
|             |           | Mid     | 0.19           | 0.52  | 15.9    | <0.01   | 0.01           | -0.34 | 37.0    | <0.01   |
|             |           | Outflow | 0.22           | 0.31  | 150.2   | <0.01   | 0.02           | -0.26 | 437.3   | <0.01   |
|             |           | ALL     | 0.23           | 0.23  | 705.6   | <0.01   | 0.01           | -0.18 | 1834.2  | <0.01   |
|             | DOC x TN  | Inflow  | 0.37           | 0.95  | 0.2     | 0.66    | 0.26           | 0.61  | 27.8    | <0.01   |
|             |           | Mid     | 0.87           | 0.94  | 0.7     | 0.40    | 0.32           | 1.10  | 0.3     | 0.60    |
|             |           | Outflow | 0.91           | 0.81  | 28.5    | <0.01   | 0.57           | 1.17  | 8.6     | <0.01   |
|             |           | ALL     | 0.78           | 0.77  | 38.7    | <0.01   | 0.34           | 0.90  | 4.3     | <0.01   |
|             | TN x TP   | Inflow  | 0.27           | 0.33  | 105.6   | <0.01   | 0.43           | 0.28  | 358.0   | <0.01   |
|             |           | Mid     | 0.27           | 0.48  | 21.9    | <0.01   | 0.13           | 0.31  | 53.2    | <0.01   |
|             |           | Outflow | 0.21           | 0.35  | 107.4   | <0.01   | 0.08           | 0.22  | 672.8   | <0.01   |
|             |           | ALL     | 0.41           | 0.28  | 569.7   | <0.01   | 0.28           | 0.20  | 2019.3  | <0.01   |

Table 3. Flocculent and Soil standardized major axis regression results for flow way 1 (FW 1) and FW 3 within Stormwater Treatment Area-2 for Inflow, Mid, Outflow and Entire FW (ALL) regions. Stoichiometric comparisons include Total Carbon to Total Phosphorus (TC:TP), Total Carbon to Total Nitrogen (TC:TN) and Total Nitrogen to Total Phosphorus (TN:TP).

| Compartment | Parameter | Region  | FW 1           |       |         |         | FW 3           |       |         |         |
|-------------|-----------|---------|----------------|-------|---------|---------|----------------|-------|---------|---------|
|             |           |         | R <sup>2</sup> | Slope | F-value | ρ-value | R <sup>2</sup> | Slope | F-value | ρ-value |
| Floc        | TC x TP   | Inflow  | 0.85           | 0.93  | 0.3     | 0.57    | 0.99           | 0.91  | 6.4     | 0.05    |
|             |           | Mid     | 0.81           | 0.79  | 2.3     | 0.17    | 0.70           | 0.78  | 1.8     | 0.21    |
|             |           | Outflow | 0.93           | 0.78  | 9.7     | <0.05   | 0.91           | 1.10  | 1.0     | 0.35    |
|             |           | ALL     | 0.79           | 0.66  | 28.7    | <0.05   | 0.63           | 0.68  | 11.6    | <0.05   |
|             | TC x TN   | Inflow  | 0.96           | 1.08  | 1.4     | 0.26    | 0.98           | 0.97  | 0.3     | 0.58    |
|             |           | Mid     | 0.87           | 0.92  | 0.5     | 0.52    | 0.96           | 1.05  | 0.4     | 0.54    |
|             |           | Outflow | 0.98           | 0.90  | 6.2     | <0.05   | 0.98           | 0.95  | 1.1     | 0.32    |
|             |           | ALL     | 0.95           | 0.93  | 4.1     | 0.05    | 0.96           | 0.99  | 0.1     | 0.74    |
|             | TN x TP   | Inflow  | 0.90           | 0.86  | 2.4     | 0.16    | 0.99           | 0.95  | 2.2     | 0.20    |
|             |           | Mid     | 0.93           | 0.86  | 2.4     | 0.16    | 0.74           | 0.75  | 3.0     | 0.12    |
|             |           | Outflow | 0.97           | 0.87  | 7.4     | <0.05   | 0.93           | 1.15  | 3.0     | 0.11    |
|             |           | ALL     | 0.83           | 0.71  | 22.9    | <0.05   | 0.60           | 0.69  | 9.9     | <0.05   |
| Soil        | TC x TP   | Inflow  | 0.96           | 0.83  | 9.1     | <0.05   | 0.98           | 0.86  | 6.3     | 0.05    |
|             |           | Mid     | 0.95           | 0.83  | 5.8     | <0.05   | 0.80           | 0.48  | 34.5    | <0.05   |
|             |           | Outflow | 0.81           | 1.06  | 0.2     | 0.69    | 0.74           | 1.41  | 5.3     | <0.05   |
|             |           | ALL     | 0.90           | 0.79  | 17.4    | <0.05   | 0.63           | 0.59  | 24.5    | <0.05   |
|             | TC x TN   | Inflow  | 0.99           | 1.02  | 0.7     | 0.44    | 1.00           | 1.07  | 6.0     | 0.06    |
|             |           | Mid     | 0.99           | 1.05  | 1.8     | 0.22    | 0.95           | 1.20  | 7.7     | <0.05   |
|             |           | Outflow | 0.97           | 0.93  | 1.8     | 0.21    | 0.99           | 0.95  | 5.1     | <0.05   |
|             |           | ALL     | 0.99           | 1.01  | 0.2     | 0.67    | 0.97           | 1.06  | 3.7     | 0.06    |
|             | TN x TP   | Inflow  | 0.98           | 0.81  | 19.8    | <0.05   | 0.99           | 0.80  | 16.3    | <0.05   |
|             |           | Mid     | 0.97           | 0.79  | 14.4    | <0.05   | 0.66           | 0.40  | 35.0    | <0.05   |
|             |           | Outflow | 0.86           | 1.13  | 1.2     | 0.31    | 0.71           | 1.49  | 6.3     | <0.05   |
|             |           | ALL     | 0.90           | 0.79  | 19.2    | <0.05   | 0.49           | 0.56  | 22.9    | <0.05   |

Table 4. Live above ground biomass (AGB) nutrient concentration standardized major axis regression results for flow way 1 (FW 1) and FW 3 within Stormwater Treatment Area-2. Stoichiometric comparisons include Total Carbon to Total Phosphorus (TC:TP), Total Carbon to Total Nitrogen (TC:TN) and Total Nitrogen to Total Phosphorus (TN:TP).

| Compartment | Parameter | FW 1           |       |         |         | FW 3           |       |         |         |
|-------------|-----------|----------------|-------|---------|---------|----------------|-------|---------|---------|
|             |           | R <sup>2</sup> | Slope | F-value | ρ-value | R <sup>2</sup> | Slope | F-value | ρ-value |
| Live AGB    | TC x TP   | 0.58           | 0.90  | 0.9     | 0.35    | 0.66           | 1.31  | 6.7     | <0.05   |
|             | TC x TN   | 0.88           | 1.08  | 1.8     | 0.19    | 0.94           | 1.18  | 14.9    | <0.01   |
|             | TN x TP   | 0.75           | 0.84  | 4.7     | <0.05   | 0.79           | 1.11  | 1.5     | 0.23    |
